# Supplementary material for: Seasonally modulated nonlinear effects of PM2.5 on pediatric respiratory health: evidence from a time-series analysis in urban China
Source: PeerJ. 2025 Oct 10;13:e20187. doi: 10.7717/peerj.20187 (PMC12517280; doi:10.7717/peerj.20187)
Supplement: Supplemental Information 1 [file peerj-13-20187-s001.xlsx]

## Sheet: Sheet2
date	respiratory diseases	time	year	month	day	season	mean temperature	mean relative humidity	mean wind speed	mean dew point temperature	day of the week	Holiday	CO	ozone	PM2.5	sex
2018-01-01	18	1	2018	1	1	4	14.6	72.75	1.625	9.45	Monday	1	1.52	50.6	101.4	1
2018-01-01	18	1	2018	1	1	4	14.6	72.75	1.625	9.45	Monday	1	1.52	50.6	101.4	2
2018-01-02	14	2	2018	1	2	4	17.9625	74.875	1.25	13.1875	Tuesday	1	1.58333	52.9167	93.5	1
2018-01-02	14	2	2018	1	2	4	17.9625	74.875	1.25	13.1875	Tuesday	1	1.58333	52.9167	93.5	2
2018-01-03	27	3	2018	1	3	4	19.775	74.5	1.375	14.65	Wednesday	1	1.8125	82.0833	106.917	1
2018-01-03	27	3	2018	1	3	4	19.775	74.5	1.375	14.65	Wednesday	1	1.8125	82.0833	106.917	2
2018-01-04	20	4	2018	1	4	4	19.8	77.875	1.5	15.5375	Thursday	0	0.986957	44.1667	44.1667	1
2018-01-04	20	4	2018	1	4	4	19.8	77.875	1.5	15.5375	Thursday	0	0.986957	44.1667	44.1667	2
2018-01-05	22	5	2018	1	5	4	15.4125	81.5	3.125	12.2	Friday	0	1.125	6.875	31.5417	1
2018-01-05	22	5	2018	1	5	4	15.4125	81.5	3.125	12.2	Friday	0	1.125	6.875	31.5417	2
2018-01-06	16	6	2018	1	6	4	12.4375	97.25	3	12.0375	Saturday	0	1.22083	3.875	21.4167	1
2018-01-06	16	6	2018	1	6	4	12.4375	97.25	3	12.0375	Saturday	0	1.22083	3.875	21.4167	2
2018-01-07	18	7	2018	1	7	4	15.775	96.5	1.5	15.1625	Sunday	0	1.1375	7.25	27.1667	1
2018-01-07	18	7	2018	1	7	4	15.775	96.5	1.5	15.1625	Sunday	0	1.1375	7.25	27.1667	2
2018-01-08	15	8	2018	1	8	4	10.4	95.75	5.125	9.7	Monday	0	1.19524	6.41667	20.9167	1
2018-01-08	15	8	2018	1	8	4	10.4	95.75	5.125	9.7	Monday	0	1.19524	6.41667	20.9167	2
2018-01-09	16	9	2018	1	9	4	6.9	83.5	3.25	4.15	Tuesday	0	0.817391	39.625	40.0833	1
2018-01-09	16	9	2018	1	9	4	6.9	83.5	3.25	4.15	Tuesday	0	0.817391	39.625	40.0833	2
2018-01-10	17	10	2018	1	10	4	10.3625	57.625	2.375	1.7	Wednesday	0	0.6	48.8333	21.7083	1
2018-01-10	17	10	2018	1	10	4	10.3625	57.625	2.375	1.7	Wednesday	0	0.6	48.8333	21.7083	2
2018-01-11	21	11	2018	1	11	4	10.0625	57.5	2.75	0.675	Thursday	0	0.56087	56.0417	18.25	1
2018-01-11	21	11	2018	1	11	4	10.0625	57.5	2.75	0.675	Thursday	0	0.56087	56.0417	18.25	2
2018-01-12	11	12	2018	1	12	4	8.925	61.25	2.875	0.35	Friday	0	0.725	47.2083	23.25	1
2018-01-12	11	12	2018	1	12	4	8.925	61.25	2.875	0.35	Friday	0	0.725	47.2083	23.25	2
2018-01-13	28	13	2018	1	13	4	10.575	58.875	1.75	1.4375	Saturday	0	0.820833	47.913	41.9583	1
2018-01-13	28	13	2018	1	13	4	10.575	58.875	1.75	1.4375	Saturday	0	0.820833	47.913	41.9583	2
2018-01-14	21	14	2018	1	14	4	11.6875	73	1.375	5.9	Sunday	0	1.22917	52.7917	59.8696	1
2018-01-14	21	14	2018	1	14	4	11.6875	73	1.375	5.9	Sunday	0	1.22917	52.7917	59.8696	2
2018-01-15	26	15	2018	1	15	4	12.4875	73.875	2	6.6	Monday	0	1.83333	50.75	78.7917	1
2018-01-15	26	15	2018	1	15	4	12.4875	73.875	2	6.6	Monday	0	1.83333	50.75	78.7917	2
2018-01-16	27	16	2018	1	16	4	14.0625	76.625	1.875	8.9625	Tuesday	0	1.70833	46.5417	87.375	1
2018-01-16	27	16	2018	1	16	4	14.0625	76.625	1.875	8.9625	Tuesday	0	1.70833	46.5417	87.375	2
2018-01-17	19	17	2018	1	17	4	16.625	73.125	1.625	10.75	Wednesday	0	2.32083	49.9167	133.792	1
2018-01-17	19	17	2018	1	17	4	16.625	73.125	1.625	10.75	Wednesday	0	2.32083	49.9167	133.792	2
2018-01-18	26	18	2018	1	18	4	17.0875	77.625	1.5	12.275	Thursday	0	2.44783	69.5652	145.792	1
2018-01-18	26	18	2018	1	18	4	17.0875	77.625	1.5	12.275	Thursday	0	2.44783	69.5652	145.792	2
2018-01-19	20	19	2018	1	19	4	19.8	74.5	1.625	14.7875	Friday	0	1.35417	41.7917	132.875	1
2018-01-19	20	19	2018	1	19	4	19.8	74.5	1.625	14.7875	Friday	0	1.35417	41.7917	132.875	2
2018-01-20	19	20	2018	1	20	4	19.5	82.25	1.875	16.2625	Saturday	0	1.19583	14.7083	116.87	1
2018-01-20	19	20	2018	1	20	4	19.5	82.25	1.875	16.2625	Saturday	0	1.19583	14.7083	116.87	2
2018-01-21	22	21	2018	1	21	4	18.925	88	1.625	16.6875	Sunday	0	0.975	44.4167	88.2917	1
2018-01-21	22	21	2018	1	21	4	18.925	88	1.625	16.6875	Sunday	0	0.975	44.4167	88.2917	2
2018-01-22	22	22	2018	1	22	4	19.1375	78.75	2.375	15.025	Monday	0	1.51667	53.3333	137.958	1
2018-01-22	22	22	2018	1	22	4	19.1375	78.75	2.375	15.025	Monday	0	1.51667	53.3333	137.958	2
2018-01-23	24	23	2018	1	23	4	17.0583	68.25	1.72917	13.1042	Tuesday	0	1.51667	13.125	90.7917	1
2018-01-23	24	23	2018	1	23	4	17.0583	68.25	1.72917	13.1042	Tuesday	0	1.51667	13.125	90.7917	2
2018-01-24	13	24	2018	1	24	4	18.0792	51.0417	1.91667	13.475	Wednesday	0	1.15	56.1667	75.0417	1
2018-01-24	13	24	2018	1	24	4	18.0792	51.0417	1.91667	13.475	Wednesday	0	1.15	56.1667	75.0417	2
2018-01-25	20	25	2018	1	25	4	18.7167	50.6957	1.9375	13.7625	Thursday	0	0.754545	54.913	43.375	1
2018-01-25	20	25	2018	1	25	4	18.7167	50.6957	1.9375	13.7625	Thursday	0	0.754545	54.913	43.375	2
2018-01-26	18	26	2018	1	26	4	11.5125	59.3261	4.25	7	Friday	0	0.96	12.4545	33.087	1
2018-01-26	18	26	2018	1	26	4	11.5125	59.3261	4.25	7	Friday	0	0.96	12.4545	33.087	2
2018-01-27	13	27	2018	1	27	4	13.4292	73.5417	2.64583	8.56667	Saturday	0	0.991667	19.5833	39.625	1
2018-01-27	13	27	2018	1	27	4	13.4292	73.5417	2.64583	8.56667	Saturday	0	0.991667	19.5833	39.625	2
2018-01-28	16	28	2018	1	28	4	8.22083	71.8542	4.89583	5.125	Sunday	0	1.0375	8.58333	29.1667	1
2018-01-28	16	28	2018	1	28	4	8.22083	71.8542	4.89583	5.125	Sunday	0	1.0375	8.58333	29.1667	2
2018-01-29	23	29	2018	1	29	4	5.8	85.5	5.79167	2.24167	Monday	0	0.879167	24.75	13.2083	1
2018-01-29	23	29	2018	1	29	4	5.8	85.5	5.79167	2.24167	Monday	0	0.879167	24.75	13.2083	2
2018-01-30	13	30	2018	1	30	4	5.32083	74.7292	3.95833	3.875	Tuesday	0	0.920833	21.7917	27.3333	1
2018-01-30	13	30	2018	1	30	4	5.32083	74.7292	3.95833	3.875	Tuesday	0	0.920833	21.7917	27.3333	2
2018-01-31	16	31	2018	1	31	4	5.95417	57.25	5.41667	0.983333	Wednesday	0	1.12083	25.75	16.875	1
2018-01-31	16	31	2018	1	31	4	5.95417	57.25	5.41667	0.983333	Wednesday	0	1.12083	25.75	16.875	2
2018-02-01	16	32	2018	2	1	4	10.05	61.8542	4.20833	0.729167	Thursday	0	0.856522	64.2174	53	1
2018-02-01	16	32	2018	2	1	4	10.05	61.8542	4.20833	0.729167	Thursday	0	0.856522	64.2174	53	2
2018-02-02	14	33	2018	2	2	4	8.37917	60.2083	4.95833	-1.51667	Friday	0	0.670833	60.7083	42.5833	1
2018-02-02	14	33	2018	2	2	4	8.37917	60.2083	4.95833	-1.51667	Friday	0	0.670833	60.7083	42.5833	2
2018-02-03	8	34	2018	2	3	4	9.9125	70.625	5.625	-4.27917	Saturday	0	0.625	92.625	36.75	1
2018-02-03	8	34	2018	2	3	4	9.9125	70.625	5.625	-4.27917	Saturday	0	0.625	92.625	36.75	2
2018-02-04	16	35	2018	2	4	4	7.77083	87.1875	5.9375	-8.6875	Sunday	0	0.658333	80.375	36.2083	1
2018-02-04	16	35	2018	2	4	4	7.77083	87.1875	5.9375	-8.6875	Sunday	0	0.658333	80.375	36.2083	2
2018-02-05	16	36	2018	2	5	4	8.27083	77.5208	5.79167	-9.5375	Monday	0	0.633333	67.5833	25.3333	1
2018-02-05	16	36	2018	2	5	4	8.27083	77.5208	5.79167	-9.5375	Monday	0	0.633333	67.5833	25.3333	2
2018-02-06	11	37	2018	2	6	4	10.3667	95.25	3.22917	-3.7375	Tuesday	0	0.883333	56.5	39	1
2018-02-06	11	37	2018	2	6	4	10.3667	95.25	3.22917	-3.7375	Tuesday	0	0.883333	56.5	39	2
2018-02-07	14	38	2018	2	7	4	10.4667	57.2222	2.0625	-3.7875	Wednesday	0	0.991667	29.75	43.25	1
2018-02-07	14	38	2018	2	7	4	10.4667	57.2222	2.0625	-3.7875	Wednesday	0	0.991667	29.75	43.25	2
2018-02-08	31	39	2018	2	8	4	13.1917	67.4375	2	2.00833	Thursday	0	0.895652	63.2174	45.0435	1
2018-02-08	31	39	2018	2	8	4	13.1917	67.4375	2	2.00833	Thursday	0	0.895652	63.2174	45.0435	2
2018-02-09	15	40	2018	2	9	4	14.4583	58.9167	1.47917	9.57083	Friday	0	0.833333	24.75	58.5833	1
2018-02-09	15	40	2018	2	9	4	14.4583	58.9167	1.47917	9.57083	Friday	0	0.833333	24.75	58.5833	2
2018-02-10	10	41	2018	2	10	4	14.4	72.875	3.08333	8.6	Saturday	0	1.02083	36.375	79.9583	1
2018-02-10	10	41	2018	2	10	4	14.4	72.875	3.08333	8.6	Saturday	0	1.02083	36.375	79.9583	2
2018-02-11	11	42	2018	2	11	4	13.9542	84.9583	5.33333	2.7625	Sunday	0	0.891667	89.2917	57.2083	1
2018-02-11	11	42	2018	2	11	4	13.9542	84.9583	5.33333	2.7625	Sunday	0	0.891667	89.2917	57.2083	2
2018-02-12	15	43	2018	2	12	4	13.275	71.1667	3.4375	0.683333	Monday	0	0.816667	92.5	42.6667	1
2018-02-12	15	43	2018	2	12	4	13.275	71.1667	3.4375	0.683333	Monday	0	0.816667	92.5	42.6667	2
2018-02-13	9	44	2018	2	13	4	14.4	96.25	1.3125	2.7625	Tuesday	0	0.808333	93.5417	44.8333	1
2018-02-13	9	44	2018	2	13	4	14.4	96.25	1.3125	2.7625	Tuesday	0	0.808333	93.5417	44.8333	2
2018-02-14	8	45	2018	2	14	4	17.7458	56.8125	2.29167	11.0833	Wednesday	0	0.786957	76.7826	40.2917	1
2018-02-14	8	45	2018	2	14	4	17.7458	56.8125	2.29167	11.0833	Wednesday	0	0.786957	76.7826	40.2917	2
2018-02-15	7	46	2018	2	15	4	19.0958	61.8125	1.08333	15.0458	Thursday	1	0.665217	86.087	42.6087	1
2018-02-15	7	46	2018	2	15	4	19.0958	61.8125	1.08333	15.0458	Thursday	1	0.665217	86.087	42.6087	2
2018-02-16	8	47	2018	2	16	4	20.7708	59.9792	1.41667	15.4708	Friday	1	0.891667	69.0833	114.875	1
2018-02-16	8	47	2018	2	16	4	20.7708	59.9792	1.41667	15.4708	Friday	1	0.891667	69.0833	114.875	2
2018-02-17	11	48	2018	2	17	4	19.6625	70.7292	2.52083	14.6208	Saturday	1	0.883333	53.375	66.2083	1
2018-02-17	11	48	2018	2	17	4	19.6625	70.7292	2.52083	14.6208	Saturday	1	0.883333	53.375	66.2083	2
2018-02-18	11	49	2018	2	18	4	21.275	83.7708	1.77083	16.2917	Sunday	1	0.645833	81	40.0417	1
2018-02-18	11	49	2018	2	18	4	21.275	83.7708	1.77083	16.2917	Sunday	1	0.645833	81	40.0417	2
2018-02-19	13	50	2018	2	19	4	23.0875	73.3958	1.52273	18.3708	Monday	1	0.6375	69.9583	45.4583	1
2018-02-19	13	50	2018	2	19	4	23.0875	73.3958	1.52273	18.3708	Monday	1	0.6375	69.9583	45.4583	2
2018-02-20	16	51	2018	2	20	4	23.0208	92.4375	1.33333	19.05	Tuesday	1	0.641667	46.5	46.7083	1
2018-02-20	16	51	2018	2	20	4	23.0208	92.4375	1.33333	19.05	Tuesday	1	0.641667	46.5	46.7083	2
2018-02-21	10	52	2018	2	21	4	15.7125	57.4167	3.79167	12.6792	Wednesday	1	0.730435	21.9583	37.4167	1
2018-02-21	10	52	2018	2	21	4	15.7125	57.4167	3.79167	12.6792	Wednesday	1	0.730435	21.9583	37.4167	2
2018-02-22	3	53	2018	2	22	4	11.2667	63.6458	4.04167	9.40833	Thursday	0	0.775	25.4167	7.70833	1
2018-02-22	3	53	2018	2	22	4	11.2667	63.6458	4.04167	9.40833	Thursday	0	0.775	25.4167	7.70833	2
2018-02-23	11	54	2018	2	23	4	14.4292	61.8125	2.08333	11.225	Friday	0	0.7125	31.7083	17.875	1
2018-02-23	11	54	2018	2	23	4	14.4292	61.8125	2.08333	11.225	Friday	0	0.7125	31.7083	17.875	2
2018-02-24	5	55	2018	2	24	4	17.525	63.9583	1.22917	14.8208	Saturday	0	0.925	21.25	37.4783	1
2018-02-24	5	55	2018	2	24	4	17.525	63.9583	1.22917	14.8208	Saturday	0	0.925	21.25	37.4783	2
2018-02-25	12	56	2018	2	25	4	17.4042	87.25	3.33333	12.9208	Sunday	0	1	18.625	28.3333	1
2018-02-25	12	56	2018	2	25	4	17.4042	87.25	3.33333	12.9208	Sunday	0	1	18.625	28.3333	2
2018-02-26	17	57	2018	2	26	4	19.325	77.3958	2.27083	12.5667	Monday	0	0.658333	57.0417	28.9583	1
2018-02-26	17	57	2018	2	26	4	19.325	77.3958	2.27083	12.5667	Monday	0	0.658333	57.0417	28.9583	2
2018-02-27	18	58	2018	2	27	4	21.1417	71.25	2.29167	14.8958	Tuesday	0	0.579167	64.0417	26.4167	1
2018-02-27	18	58	2018	2	27	4	21.1417	71.25	2.29167	14.8958	Tuesday	0	0.579167	64.0417	26.4167	2
2018-02-28	9	59	2018	2	28	4	22.0833	58.5625	1.29167	17.6125	Wednesday	0	0.729167	56.9583	49.4583	1
2018-02-28	9	59	2018	2	28	4	22.0833	58.5625	1.29167	17.6125	Wednesday	0	0.729167	56.9583	49.4583	2
2018-03-01	13	60	2018	3	1	1	23.4833	62.6383	2.52083	18.0875	Thursday	0	0.791667	57.8696	68.375	1
2018-03-01	13	60	2018	3	1	1	23.4833	62.6383	2.52083	18.0875	Thursday	0	0.791667	57.8696	68.375	2
2018-03-02	13	61	2018	3	2	1	24.0167	57.9375	2.41667	19.325	Friday	0	0.608333	50.0417	54.7083	1
2018-03-02	13	61	2018	3	2	1	24.0167	57.9375	2.41667	19.325	Friday	0	0.608333	50.0417	54.7083	2
2018-03-03	14	62	2018	3	3	1	24.1625	59.25	2.89583	20.6625	Saturday	0	0.504167	43.0833	37.3333	1
2018-03-03	14	62	2018	3	3	1	24.1625	59.25	2.89583	20.6625	Saturday	0	0.504167	43.0833	37.3333	2
2018-03-04	19	63	2018	3	4	1	24.9958	87.3125	4.5	21.9333	Sunday	0	0.4125	22.25	32.1667	1
2018-03-04	19	63	2018	3	4	1	24.9958	87.3125	4.5	21.9333	Sunday	0	0.4125	22.25	32.1667	2
2018-03-05	16	64	2018	3	5	1	24.2333	72.5625	2.4375	19.6667	Monday	0	0.458333	13.3333	27.1667	1
2018-03-05	16	64	2018	3	5	1	24.2333	72.5625	2.4375	19.6667	Monday	0	0.458333	13.3333	27.1667	2
2018-03-06	12	65	2018	3	6	1	20.4833	35.7708	2.5625	16.2875	Tuesday	0	0.641667	24.9583	28.9167	1
2018-03-06	12	65	2018	3	6	1	20.4833	35.7708	2.5625	16.2875	Tuesday	0	0.641667	24.9583	28.9167	2
2018-03-07	12	66	2018	3	7	1	17.25	77.6596	3.14583	13.25	Wednesday	0	0.4625	73.3333	30.2083	1
2018-03-07	12	66	2018	3	7	1	17.25	77.6596	3.14583	13.25	Wednesday	0	0.4625	73.3333	30.2083	2
2018-03-08	13	67	2018	3	8	1	10.7792	64.6087	4.97917	6.1375	Thursday	0	0.595652	30.5217	7.375	1
2018-03-08	13	67	2018	3	8	1	10.7792	64.6087	4.97917	6.1375	Thursday	0	0.595652	30.5217	7.375	2
2018-03-09	18	68	2018	3	9	1	13.6542	56.087	4.54167	4.11667	Friday	0	0.6125	78.0417	18.2917	1
2018-03-09	18	68	2018	3	9	1	13.6542	56.087	4.54167	4.11667	Friday	0	0.6125	78.0417	18.2917	2
2018-03-10	18	69	2018	3	10	1	16.3042	68.5625	1.6875	6.24583	Saturday	0	0.854167	79.9583	47.0417	1
2018-03-10	18	69	2018	3	10	1	16.3042	68.5625	1.6875	6.24583	Saturday	0	0.854167	79.9583	47.0417	2
2018-03-11	14	70	2018	3	11	1	17.4458	78.1458	1.22917	8.1875	Sunday	0	0.775	110.917	39.5	1
2018-03-11	14	70	2018	3	11	1	17.4458	78.1458	1.22917	8.1875	Sunday	0	0.775	110.917	39.5	2
2018-03-12	23	71	2018	3	12	1	19.925	73.7917	1.39583	13.2	Monday	0	0.8375	65.3333	37.375	1
2018-03-12	23	71	2018	3	12	1	19.925	73.7917	1.39583	13.2	Monday	0	0.8375	65.3333	37.375	2
2018-03-13	21	72	2018	3	13	1	22.0833	31.375	1.91667	15.4083	Tuesday	0	0.8875	65.9583	36.4583	1
2018-03-13	21	72	2018	3	13	1	22.0833	31.375	1.91667	15.4083	Tuesday	0	0.8875	65.9583	36.4583	2
2018-03-14	20	73	2018	3	14	1	22.1208	67.3617	2.52083	17.75	Wednesday	0	0.85	34.6667	41.25	1
2018-03-14	20	73	2018	3	14	1	22.1208	67.3617	2.52083	17.75	Wednesday	0	0.85	34.6667	41.25	2
2018-03-15	19	74	2018	3	15	1	21.3042	68.7708	1.39583	18.875	Thursday	0	1.06957	23.2174	59.125	1
2018-03-15	19	74	2018	3	15	1	21.3042	68.7708	1.39583	18.875	Thursday	0	1.06957	23.2174	59.125	2
2018-03-16	34	75	2018	3	16	1	23.7417	56.5417	1.35417	18.9833	Friday	0	0.858333	49.0417	83.8261	1
2018-03-16	34	75	2018	3	16	1	23.7417	56.5417	1.35417	18.9833	Friday	0	0.858333	49.0417	83.8261	2
2018-03-17	18	76	2018	3	17	1	21.5917	81.5417	2.95833	17.1083	Saturday	0	0.5625	65.625	39.625	1
2018-03-17	18	76	2018	3	17	1	21.5917	81.5417	2.95833	17.1083	Saturday	0	0.5625	65.625	39.625	2
2018-03-18	21	77	2018	3	18	1	22.675	63.7292	2.3125	18.9583	Sunday	0	0.566667	68.3333	32.2917	1
2018-03-18	21	77	2018	3	18	1	22.675	63.7292	2.3125	18.9583	Sunday	0	0.566667	68.3333	32.2917	2
2018-03-19	16	78	2018	3	19	1	20.0542	73.0417	2.1875	18.6167	Monday	0	0.629167	29.625	37.7917	1
2018-03-19	16	78	2018	3	19	1	20.0542	73.0417	2.1875	18.6167	Monday	0	0.629167	29.625	37.7917	2
2018-03-20	18	79	2018	3	20	1	15.725	29.5	6.5	8.9	Tuesday	0	0.8	61	9.58333	1
2018-03-20	18	79	2018	3	20	1	15.725	29.5	6.5	8.9	Tuesday	0	0.8	61	9.58333	2
2018-03-21	9	80	2018	3	21	1	16.9333	74.8958	5.10417	6.325	Wednesday	0	0.708333	81.0417	16.8333	1
2018-03-21	9	80	2018	3	21	1	16.9333	74.8958	5.10417	6.325	Wednesday	0	0.708333	81.0417	16.8333	2
2018-03-22	19	81	2018	3	22	1	17.8333	67.9583	1.89362	7.35833	Thursday	0	0.709091	84.6522	38.5217	1
2018-03-22	19	81	2018	3	22	1	17.8333	67.9583	1.89362	7.35833	Thursday	0	0.709091	84.6522	38.5217	2
2018-03-23	23	82	2018	3	23	1	20.4083	60.6042	1.97917	10.275	Friday	0	0.9375	96.5	66.75	1
2018-03-23	23	82	2018	3	23	1	20.4083	60.6042	1.97917	10.275	Friday	0	0.9375	96.5	66.75	2
2018-03-24	13	83	2018	3	24	1	21.4833	73.125	2.02083	16.3917	Saturday	0	0.7625	79.7083	47.7917	1
2018-03-24	13	83	2018	3	24	1	21.4833	73.125	2.02083	16.3917	Saturday	0	0.7625	79.7083	47.7917	2
2018-03-25	23	84	2018	3	25	1	21.0625	58.4375	1.70833	17.1792	Sunday	0	0.795833	73.1667	39.125	1
2018-03-25	23	84	2018	3	25	1	21.0625	58.4375	1.70833	17.1792	Sunday	0	0.795833	73.1667	39.125	2
2018-03-26	23	85	2018	3	26	1	20.7667	77.1875	1.91667	16.5833	Monday	0	1.10417	70.7917	71.6667	1
2018-03-26	23	85	2018	3	26	1	20.7667	77.1875	1.91667	16.5833	Monday	0	1.10417	70.7917	71.6667	2
2018-03-27	20	86	2018	3	27	1	22.1792	39.3333	1.29167	15.3333	Tuesday	0	1.00833	83.5833	47.2083	1
2018-03-27	20	86	2018	3	27	1	22.1792	39.3333	1.29167	15.3333	Tuesday	0	1.00833	83.5833	47.2083	2
2018-03-28	27	87	2018	3	28	1	23.5875	68.8542	1.97917	17.1	Wednesday	0	0.891667	110.792	83.9167	1
2018-03-28	27	87	2018	3	28	1	23.5875	68.8542	1.97917	17.1	Wednesday	0	0.891667	110.792	83.9167	2
2018-03-29	16	88	2018	3	29	1	23.2958	64.8333	1.70833	17.5	Thursday	0	0.778261	98.75	52.25	1
2018-03-29	16	88	2018	3	29	1	23.2958	64.8333	1.70833	17.5	Thursday	0	0.778261	98.75	52.25	2
2018-03-30	27	89	2018	3	30	1	23.4125	59.5319	1.625	19.2875	Friday	0	0.908333	79.25	65.5833	1
2018-03-30	27	89	2018	3	30	1	23.4125	59.5319	1.625	19.2875	Friday	0	0.908333	79.25	65.5833	2
2018-03-31	21	90	2018	3	31	1	23.2125	75.766	1.44681	18.0125	Saturday	0	0.604167	109.667	24.5833	1
2018-03-31	21	90	2018	3	31	1	23.2125	75.766	1.44681	18.0125	Saturday	0	0.604167	109.667	24.5833	2
2018-04-01	21	91	2018	4	1	1	24.5875	59.8958	1.8125	18.1417	Sunday	0	0.645833	128	40.9583	1
2018-04-01	21	91	2018	4	1	1	24.5875	59.8958	1.8125	18.1417	Sunday	0	0.645833	128	40.9583	2
2018-04-02	26	92	2018	4	2	1	25.0375	75.3542	2.125	19.2042	Monday	0	0.794737	132.789	55.1579	1
2018-04-02	26	92	2018	4	2	1	25.0375	75.3542	2.125	19.2042	Monday	0	0.794737	132.789	55.1579	2
2018-04-03	17	93	2018	4	3	1	24.3958	54.9792	2.60417	18.1833	Tuesday	0	0.725	76.5833	50.25	1
2018-04-03	17	93	2018	4	3	1	24.3958	54.9792	2.60417	18.1833	Tuesday	0	0.725	76.5833	50.25	2
2018-04-04	23	94	2018	4	4	1	25.2458	65.2708	2.125	18.3208	Wednesday	0	0.63913	63.3913	32.6667	1
2018-04-04	23	94	2018	4	4	1	25.2458	65.2708	2.125	18.3208	Wednesday	0	0.63913	63.3913	32.6667	2
2018-04-05	15	95	2018	4	5	1	25.2167	76.2609	2.83333	18.4125	Thursday	1	0.516667	63.0417	24.5833	1
2018-04-05	15	95	2018	4	5	1	25.2167	76.2609	2.83333	18.4125	Thursday	1	0.516667	63.0417	24.5833	2
2018-04-06	24	96	2018	4	6	1	15.2625	58.4894	6.61702	9.54583	Friday	1	0.7125	45.4583	19.8333	1
2018-04-06	24	96	2018	4	6	1	15.2625	58.4894	6.61702	9.54583	Friday	1	0.7125	45.4583	19.8333	2
2018-04-07	20	97	2018	4	7	1	15.5125	71.5833	4.45833	6.15417	Saturday	1	0.629167	74.0833	33.0417	1
2018-04-07	20	97	2018	4	7	1	15.5125	71.5833	4.45833	6.15417	Saturday	1	0.629167	74.0833	33.0417	2
2018-04-08	22	98	2018	4	8	1	18.3542	81.8125	1.39583	5.79167	Sunday	0	0.829167	92.1667	45.5417	1
2018-04-08	22	98	2018	4	8	1	18.3542	81.8125	1.39583	5.79167	Sunday	0	0.829167	92.1667	45.5417	2
2018-04-09	23	99	2018	4	9	1	22.3125	69.8333	2.125	15.8458	Monday	0	1.0125	94.375	60.5417	1
2018-04-09	23	99	2018	4	9	1	22.3125	69.8333	2.125	15.8458	Monday	0	1.0125	94.375	60.5417	2
2018-04-10	25	100	2018	4	10	1	24.1083	59.9792	2.33333	17.6042	Tuesday	0	0.85	88.9583	37.1667	1
2018-04-10	25	100	2018	4	10	1	24.1083	59.9792	2.33333	17.6042	Tuesday	0	0.85	88.9583	37.1667	2
2018-04-11	19	101	2018	4	11	1	25.4812	63.7083	2.5	19.9625	Wednesday	0	0.904167	42.5417	38.75	1
2018-04-11	19	101	2018	4	11	1	25.4812	63.7083	2.5	19.9625	Wednesday	0	0.904167	42.5417	38.75	2
2018-04-12	26	102	2018	4	12	1	25.7375	77.0652	2.89362	21.7458	Thursday	0	0.714286	25.7391	21.3636	1
2018-04-12	26	102	2018	4	12	1	25.7375	77.0652	2.89362	21.7458	Thursday	0	0.714286	25.7391	21.3636	2
2018-04-13	18	103	2018	4	13	1	26.0708	60.4375	3.64583	22.125	Friday	0	0.441667	19.7727	17.875	1
2018-04-13	18	103	2018	4	13	1	26.0708	60.4375	3.64583	22.125	Friday	0	0.441667	19.7727	17.875	2
2018-04-14	16	104	2018	4	14	1	21.375	77.125	3.8125	18.0917	Saturday	0	0.508333	19.875	20.0417	1
2018-04-14	16	104	2018	4	14	1	21.375	77.125	3.8125	18.0917	Saturday	0	0.508333	19.875	20.0417	2
2018-04-15	33	105	2018	4	15	1	17.4417	63.3125	4.89583	13.0333	Sunday	0	0.721739	35.25	17.875	1
2018-04-15	33	105	2018	4	15	1	17.4417	63.3125	4.89583	13.0333	Sunday	0	0.721739	35.25	17.875	2
2018-04-16	21	106	2018	4	16	1	15.2625	64.9167	2.16667	12.7833	Monday	0	0.679167	32.1667	28.9167	1
2018-04-16	21	106	2018	4	16	1	15.2625	64.9167	2.16667	12.7833	Monday	0	0.679167	32.1667	28.9167	2
2018-04-17	14	107	2018	4	17	1	21.1167	62.5	1.14583	14.2292	Tuesday	0	0.716667	91.9167	52.9583	1
2018-04-17	14	107	2018	4	17	1	21.1167	62.5	1.14583	14.2292	Tuesday	0	0.716667	91.9167	52.9583	2
2018-04-18	20	108	2018	4	18	1	23.1042	76.8542	1.4375	17.9458	Wednesday	0	0.975	96	89.2083	1
2018-04-18	20	108	2018	4	18	1	23.1042	76.8542	1.4375	17.9458	Wednesday	0	0.975	96	89.2083	2
2018-04-19	15	109	2018	4	19	1	23.0917	68.0652	1.02083	19.5042	Thursday	0	0.9	100.318	76.2917	1
2018-04-19	15	109	2018	4	19	1	23.0917	68.0652	1.02083	19.5042	Thursday	0	0.9	100.318	76.2917	2
2018-04-20	22	110	2018	4	20	1	23.7917	56.7292	1.59574	19.4458	Friday	0	0.7375	59.6667	50.625	1
2018-04-20	22	110	2018	4	20	1	23.7917	56.7292	1.59574	19.4458	Friday	0	0.7375	59.6667	50.625	2
2018-04-21	28	111	2018	4	21	1	24.8292	75.625	2.60417	20.3583	Saturday	0	0.604167	43.125	28.5833	1
2018-04-21	28	111	2018	4	21	1	24.8292	75.625	2.60417	20.3583	Saturday	0	0.604167	43.125	28.5833	2
2018-04-22	20	112	2018	4	22	1	25.6583	60.1667	3.125	21.5792	Sunday	0	0.620833	27.2083	38.125	1
2018-04-22	20	112	2018	4	22	1	25.6583	60.1667	3.125	21.5792	Sunday	0	0.620833	27.2083	38.125	2
2018-04-23	24	113	2018	4	23	1	25.1375	65.9792	2.44444	22.4542	Monday	0	0.582353	44.0588	25.5882	1
2018-04-23	24	113	2018	4	23	1	25.1375	65.9792	2.44444	22.4542	Monday	0	0.582353	44.0588	25.5882	2
2018-04-24	21	114	2018	4	24	1	23.0542	64.1042	3.55319	18.7958	Tuesday	0	0.841667	16.4167	22.875	1
2018-04-24	21	114	2018	4	24	1	23.0542	64.1042	3.55319	18.7958	Tuesday	0	0.841667	16.4167	22.875	2
2018-04-25	21	115	2018	4	25	1	23.2043	58.625	2.45833	18.3565	Wednesday	0	0.9	47.4783	37.75	1
2018-04-25	21	115	2018	4	25	1	23.2043	58.625	2.45833	18.3565	Wednesday	0	0.9	47.4783	37.75	2
2018-04-26	20	116	2018	4	26	1	22.0833	68.4792	1.33333	20.6917	Thursday	0	1.325	8.95833	66.9583	1
2018-04-26	20	116	2018	4	26	1	22.0833	68.4792	1.33333	20.6917	Thursday	0	1.325	8.95833	66.9583	2
2018-04-27	26	117	2018	4	27	1	23.5667	62.0208	1.41667	21.1292	Friday	0	1.24167	25.5417	58.7917	1
2018-04-27	26	117	2018	4	27	1	23.5667	62.0208	1.41667	21.1292	Friday	0	1.24167	25.5417	58.7917	2
2018-04-28	18	118	2018	4	28	1	23.4708	80.7292	1.5	22.1667	Saturday	0	1.23333	46.2917	52.3333	1
2018-04-28	18	118	2018	4	28	1	23.4708	80.7292	1.5	22.1667	Saturday	0	1.23333	46.2917	52.3333	2
2018-04-29	25	119	2018	4	29	1	25.0958	59.8125	0.833333	22.4542	Sunday	1	0.717391	61.5217	32	1
2018-04-29	25	119	2018	4	29	1	25.0958	59.8125	0.833333	22.4542	Sunday	1	0.717391	61.5217	32	2
2018-04-30	22	120	2018	4	30	1	25.875	68.0625	1.15217	23.2208	Monday	1	0.66087	43.5217	30.4348	1
2018-04-30	22	120	2018	4	30	1	25.875	68.0625	1.15217	23.2208	Monday	1	0.66087	43.5217	30.4348	2
2018-05-01	14	121	2018	5	1	1	26.7583	65.5	1.82609	24.0875	Tuesday	1	0.641667	36.7917	20.9167	1
2018-05-01	14	121	2018	5	1	1	26.7583	65.5	1.82609	24.0875	Tuesday	1	0.641667	36.7917	20.9167	2
2018-05-02	23	122	2018	5	2	1	27.1625	59.3542	1.89583	22.7917	Wednesday	0	0.65	68.1667	27	1
2018-05-02	23	122	2018	5	2	1	27.1625	59.3542	1.89583	22.7917	Wednesday	0	0.65	68.1667	27	2
2018-05-03	14	123	2018	5	3	1	27.0292	69.4375	4.02083	20.4333	Thursday	0	0.704348	74.3043	30	1
2018-05-03	14	123	2018	5	3	1	27.0292	69.4375	4.02083	20.4333	Thursday	0	0.704348	74.3043	30	2
2018-05-04	26	124	2018	5	4	1	23.8042	64.2766	2.36957	20.6417	Friday	0	0.875	90.5833	27.375	1
2018-05-04	26	124	2018	5	4	1	23.8042	64.2766	2.36957	20.6417	Friday	0	0.875	90.5833	27.375	2
2018-05-05	25	125	2018	5	5	1	27.0833	79.7292	3.02128	22.0208	Saturday	0	0.617391	69.3043	18.3913	1
2018-05-05	25	125	2018	5	5	1	27.0833	79.7292	3.02128	22.0208	Saturday	0	0.617391	69.3043	18.3913	2
2018-05-06	13	126	2018	5	6	1	27.8667	74.2708	3.08333	23.8917	Sunday	0	0.595833	43.6667	17.0833	1
2018-05-06	13	126	2018	5	6	1	27.8667	74.2708	3.08333	23.8917	Sunday	0	0.595833	43.6667	17.0833	2
2018-05-07	20	127	2018	5	7	1	25.8333	64.75	3.35417	23.2667	Monday	0	0.582353	67.1176	11.3529	1
2018-05-07	20	127	2018	5	7	1	25.8333	64.75	3.35417	23.2667	Monday	0	0.582353	67.1176	11.3529	2
2018-05-08	19	128	2018	5	8	1	25.9458	63.4375	2.29167	21.575	Tuesday	0	0.886364	34.4545	28.7727	1
2018-05-08	19	128	2018	5	8	1	25.9458	63.4375	2.29167	21.575	Tuesday	0	0.886364	34.4545	28.7727	2
2018-05-09	24	129	2018	5	9	1	22.575	60.2083	2.60417	21.0042	Wednesday	0	1.03043	30.6522	31.6957	1
2018-05-09	24	129	2018	5	9	1	22.575	60.2083	2.60417	21.0042	Wednesday	0	1.03043	30.6522	31.6957	2
2018-05-10	21	130	2018	5	10	1	23.2	70.5333	2.29167	19.8292	Thursday	0	0.721739	75.913	25	1
2018-05-10	21	130	2018	5	10	1	23.2	70.5333	2.29167	19.8292	Thursday	0	0.721739	75.913	25	2
2018-05-11	25	131	2018	5	11	1	25.0458	76.7083	1.75	21.7333	Friday	0	0.608333	67.1667	27.375	1
2018-05-11	25	131	2018	5	11	1	25.0458	76.7083	1.75	21.7333	Friday	0	0.608333	67.1667	27.375	2
2018-05-12	18	132	2018	5	12	1	27.0583	79.0833	1.7234	23.4792	Saturday	0	0.654167	48.2083	26.3333	1
2018-05-12	18	132	2018	5	12	1	27.0583	79.0833	1.7234	23.4792	Saturday	0	0.654167	48.2083	26.3333	2
2018-05-13	16	133	2018	5	13	1	27.2208	72.6667	2.1875	23.4083	Sunday	0	0.733333	54.75	20.9583	1
2018-05-13	16	133	2018	5	13	1	27.2208	72.6667	2.1875	23.4083	Sunday	0	0.733333	54.75	20.9583	2
2018-05-14	23	134	2018	5	14	1	29.2875	63.6875	2.34043	24.3375	Monday	0	0.675	57.4167	18.5417	1
2018-05-14	23	134	2018	5	14	1	29.2875	63.6875	2.34043	24.3375	Monday	0	0.675	57.4167	18.5417	2
2018-05-15	20	135	2018	5	15	1	29.0375	68.7708	3.59574	23.3625	Tuesday	0	0.580952	61.8095	17.2857	1
2018-05-15	20	135	2018	5	15	1	29.0375	68.7708	3.59574	23.3625	Tuesday	0	0.580952	61.8095	17.2857	2
2018-05-16	26	136	2018	5	16	1	29.1583	54.5208	3.20833	23.2833	Wednesday	0	0.556522	47.5652	18.2917	1
2018-05-16	26	136	2018	5	16	1	29.1583	54.5208	3.20833	23.2833	Wednesday	0	0.556522	47.5652	18.2917	2
2018-05-17	26	137	2018	5	17	1	29.3292	72.3333	2.66667	24.5625	Thursday	0	0.620833	47.75	16.8333	1
2018-05-17	26	137	2018	5	17	1	29.3292	72.3333	2.66667	24.5625	Thursday	0	0.620833	47.75	16.8333	2
2018-05-18	19	138	2018	5	18	1	30.35	84.9362	2.5625	24.4458	Friday	0	0.635294	85.7647	21.5294	1
2018-05-18	19	138	2018	5	18	1	30.35	84.9362	2.5625	24.4458	Friday	0	0.635294	85.7647	21.5294	2
2018-05-19	16	139	2018	5	19	1	31.1458	79.4375	2.39583	23.8708	Saturday	0	0.645833	76.5417	23.2917	1
2018-05-19	16	139	2018	5	19	1	31.1458	79.4375	2.39583	23.8708	Saturday	0	0.645833	76.5417	23.2917	2
2018-05-20	22	140	2018	5	20	1	31.0542	77.2292	2.5625	23.7208	Sunday	0	0.620833	65.75	18.5417	1
2018-05-20	22	140	2018	5	20	1	31.0542	77.2292	2.5625	23.7208	Sunday	0	0.620833	65.75	18.5417	2
2018-05-21	27	141	2018	5	21	1	31.2458	67.3958	2.26087	22.6875	Monday	0	0.641667	71.2174	20.7917	1
2018-05-21	27	141	2018	5	21	1	31.2458	67.3958	2.26087	22.6875	Monday	0	0.641667	71.2174	20.7917	2
2018-05-22	23	142	2018	5	22	1	31.0583	78.0833	1.97917	22.5583	Tuesday	0	0.688235	69.6471	20.7647	1
2018-05-22	23	142	2018	5	22	1	31.0583	78.0833	1.97917	22.5583	Tuesday	0	0.688235	69.6471	20.7647	2
2018-05-23	18	143	2018	5	23	1	31.7333	49.3125	1.82222	23.4417	Wednesday	0	0.75	133.208	28.375	1
2018-05-23	18	143	2018	5	23	1	31.7333	49.3125	1.82222	23.4417	Wednesday	0	0.75	133.208	28.375	2
2018-05-24	20	144	2018	5	24	1	31	74.4792	3.72917	22.5208	Thursday	0	0.63913	85.7826	24.0417	1
2018-05-24	20	144	2018	5	24	1	31	74.4792	3.72917	22.5208	Thursday	0	0.63913	85.7826	24.0417	2
2018-05-25	17	145	2018	5	25	1	31.4375	71.3333	3.375	23.2667	Friday	0	0.520833	75.7917	15.4583	1
2018-05-25	17	145	2018	5	25	1	31.4375	71.3333	3.375	23.2667	Friday	0	0.520833	75.7917	15.4583	2
2018-05-26	23	146	2018	5	26	1	31.6625	74.0625	3.52083	24.1583	Saturday	0	0.575	66.7917	16.625	1
2018-05-26	23	146	2018	5	26	1	31.6625	74.0625	3.52083	24.1583	Saturday	0	0.575	66.7917	16.625	2
2018-05-27	26	147	2018	5	27	1	27.7292	72.2083	2.91304	23.8958	Sunday	0	0.691667	55.0417	20.0833	1
2018-05-27	26	147	2018	5	27	1	27.7292	72.2083	2.91304	23.8958	Sunday	0	0.691667	55.0417	20.0833	2
2018-05-28	16	148	2018	5	28	1	29.98	73.0426	2.3125	22.575	Monday	0	0.854167	91.0833	37.0833	1
2018-05-28	16	148	2018	5	28	1	29.98	73.0426	2.3125	22.575	Monday	0	0.854167	91.0833	37.0833	2
2018-05-29	9	149	2018	5	29	1	31.1652	67.9167	2.65957	22.087	Tuesday	0	0.775	98.9167	27.375	1
2018-05-29	9	149	2018	5	29	1	31.1652	67.9167	2.65957	22.087	Tuesday	0	0.775	98.9167	27.375	2
2018-05-30	23	150	2018	5	30	1	30.9083	48.4167	2.14583	23.05	Wednesday	0	0.725	73.0417	23.375	1
2018-05-30	23	150	2018	5	30	1	30.9083	48.4167	2.14583	23.05	Wednesday	0	0.725	73.0417	23.375	2
2018-05-31	21	151	2018	5	31	1	31.6208	75.5208	2.25532	22.0958	Thursday	0	0.620833	84.4348	21.0833	1
2018-05-31	21	151	2018	5	31	1	31.6208	75.5208	2.25532	22.0958	Thursday	0	0.620833	84.4348	21.0833	2
2018-06-01	30	152	2018	6	1	2	28.2083	65.3125	2.86364	24.325	Friday	0	0.7625	70.5833	27.75	1
2018-06-01	30	152	2018	6	1	2	28.2083	65.3125	2.86364	24.325	Friday	0	0.7625	70.5833	27.75	2
2018-06-02	19	153	2018	6	2	2	27.9875	80.9375	1.97917	24.3333	Saturday	0	0.8625	106.167	32.75	1
2018-06-02	19	153	2018	6	2	2	27.9875	80.9375	1.97917	24.3333	Saturday	0	0.8625	106.167	32.75	2
2018-06-03	15	154	2018	6	3	2	28.2417	76.7917	2.19149	23.7667	Sunday	0	0.7875	134.292	28.125	1
2018-06-03	15	154	2018	6	3	2	28.2417	76.7917	2.19149	23.7667	Sunday	0	0.7875	134.292	28.125	2
2018-06-04	23	155	2018	6	4	2	28.413	77.4583	2.55556	23.8913	Monday	0	0.816667	76.25	21.5417	1
2018-06-04	23	155	2018	6	4	2	28.413	77.4583	2.55556	23.8913	Monday	0	0.816667	76.25	21.5417	2
2018-06-05	21	156	2018	6	5	2	26.7375	73.9792	2.20833	24.8375	Tuesday	0	0.841667	44.875	18.375	1
2018-06-05	21	156	2018	6	5	2	26.7375	73.9792	2.20833	24.8375	Tuesday	0	0.841667	44.875	18.375	2
2018-06-06	16	157	2018	6	6	2	26.3542	50.1458	2.61702	24.7542	Wednesday	0	0.858333	19.0833	15.0417	1
2018-06-06	16	157	2018	6	6	2	26.3542	50.1458	2.61702	24.7542	Wednesday	0	0.858333	19.0833	15.0417	2
2018-06-07	19	158	2018	6	7	2	25.3792	70.5532	3.46809	24.4542	Thursday	0	0.808696	23.5217	10.2083	1
2018-06-07	19	158	2018	6	7	2	25.3792	70.5532	3.46809	24.4542	Thursday	0	0.808696	23.5217	10.2083	2
2018-06-08	8	159	2018	6	8	2	25.0083	68.1667	4.22917	24.375	Friday	0	0.591667	48.5833	10.2917	1
2018-06-08	8	159	2018	6	8	2	25.0083	68.1667	4.22917	24.375	Friday	0	0.591667	48.5833	10.2917	2
2018-06-09	29	160	2018	6	9	2	26.7917	75.375	2.47917	24.2042	Saturday	0	0.6875	42.4583	14.2917	1
2018-06-09	29	160	2018	6	9	2	26.7917	75.375	2.47917	24.2042	Saturday	0	0.6875	42.4583	14.2917	2
2018-06-10	21	161	2018	6	10	2	29.0667	77.4894	3.47917	21.1125	Sunday	0	0.8875	87.5417	35.9167	1
2018-06-10	21	161	2018	6	10	2	29.0667	77.4894	3.47917	21.1125	Sunday	0	0.8875	87.5417	35.9167	2
2018-06-11	11	162	2018	6	11	2	29.4292	68.6458	1.75	20.9958	Monday	0	0.891667	144.042	42.5417	1
2018-06-11	11	162	2018	6	11	2	29.4292	68.6458	1.75	20.9958	Monday	0	0.891667	144.042	42.5417	2
2018-06-12	28	163	2018	6	12	2	25.4542	74.6875	3.15217	23.5958	Tuesday	0	0.8125	92.2083	43.6667	1
2018-06-12	28	163	2018	6	12	2	25.4542	74.6875	3.15217	23.5958	Tuesday	0	0.8125	92.2083	43.6667	2
2018-06-13	19	164	2018	6	13	2	24.3167	53.3125	3.39583	22.275	Wednesday	0	0.9125	40.2083	23.4167	1
2018-06-13	19	164	2018	6	13	2	24.3167	53.3125	3.39583	22.275	Wednesday	0	0.9125	40.2083	23.4167	2
2018-06-14	19	165	2018	6	14	2	26.8917	79.2979	3.35417	21.3	Thursday	0	0.826087	63.3913	18.4167	1
2018-06-14	19	165	2018	6	14	2	26.8917	79.2979	3.35417	21.3	Thursday	0	0.826087	63.3913	18.4167	2
2018-06-15	18	166	2018	6	15	2	26.825	66.1875	2.625	22.05	Friday	0	0.75	64.5833	18.75	1
2018-06-15	18	166	2018	6	15	2	26.825	66.1875	2.625	22.05	Friday	0	0.75	64.5833	18.75	2
2018-06-16	27	167	2018	6	16	2	28.9083	64.0417	1.97917	22.3042	Saturday	0	0.841667	143.083	29.8333	1
2018-06-16	27	167	2018	6	16	2	28.9083	64.0417	1.97917	22.3042	Saturday	0	0.841667	143.083	29.8333	2
2018-06-17	17	168	2018	6	17	2	29.7542	84.8333	2.02083	23.5542	Sunday	0	0.770833	148.417	38.4167	1
2018-06-17	17	168	2018	6	17	2	29.7542	84.8333	2.02083	23.5542	Sunday	0	0.770833	148.417	38.4167	2
2018-06-18	23	169	2018	6	18	2	30.3125	75.6458	2.5	24.5458	Monday	1	0.779167	119.458	34.5833	1
2018-06-18	23	169	2018	6	18	2	30.3125	75.6458	2.5	24.5458	Monday	1	0.779167	119.458	34.5833	2
2018-06-19	19	170	2018	6	19	2	30.375	72.9375	3.28889	25.5375	Tuesday	0	0.682609	60.2174	13.7826	1
2018-06-19	19	170	2018	6	19	2	30.375	72.9375	3.28889	25.5375	Tuesday	0	0.682609	60.2174	13.7826	2
2018-06-20	18	171	2018	6	20	2	31	57.8542	3	25.6333	Wednesday	0	0.720833	68.1667	17.5833	1
2018-06-20	18	171	2018	6	20	2	31	57.8542	3	25.6333	Wednesday	0	0.720833	68.1667	17.5833	2
2018-06-21	25	172	2018	6	21	2	29.4	86.4375	2.66667	25.175	Thursday	0	0.804348	55.087	23.9565	1
2018-06-21	25	172	2018	6	21	2	29.4	86.4375	2.66667	25.175	Thursday	0	0.804348	55.087	23.9565	2
2018-06-22	12	173	2018	6	22	2	27.2375	54.4583	2.19565	25.2917	Friday	0	0.879167	32.0417	19.5	1
2018-06-22	12	173	2018	6	22	2	27.2375	54.4583	2.19565	25.2917	Friday	0	0.879167	32.0417	19.5	2
2018-06-23	21	174	2018	6	23	2	26.55	53.5208	2.35417	24.4958	Saturday	0	0.85	25.1667	12.25	1
2018-06-23	21	174	2018	6	23	2	26.55	53.5208	2.35417	24.4958	Saturday	0	0.85	25.1667	12.25	2
2018-06-24	32	175	2018	6	24	2	28.95	76.2826	3	24.0167	Sunday	0	0.883333	33.0417	16.5833	1
2018-06-24	32	175	2018	6	24	2	28.95	76.2826	3	24.0167	Sunday	0	0.883333	33.0417	16.5833	2
2018-06-25	26	176	2018	6	25	2	27.2375	80.5349	3.22917	24.7417	Monday	0	0.820833	30.875	12	1
2018-06-25	26	176	2018	6	25	2	27.2375	80.5349	3.22917	24.7417	Monday	0	0.820833	30.875	12	2
2018-06-26	13	177	2018	6	26	2	27.25	73.0417	2.20833	24.4417	Tuesday	0	0.95	36.5652	15.1739	1
2018-06-26	13	177	2018	6	26	2	27.25	73.0417	2.20833	24.4417	Tuesday	0	0.95	36.5652	15.1739	2
2018-06-27	12	178	2018	6	27	2	29.9167	58.9583	2.04167	24.0625	Wednesday	0	0.686957	68.4348	21.4783	1
2018-06-27	12	178	2018	6	27	2	29.9167	58.9583	2.04167	24.0625	Wednesday	0	0.686957	68.4348	21.4783	2
2018-06-28	18	179	2018	6	28	2	30.75	78.8958	2.2766	24.0417	Thursday	0	0.569565	73.1304	18.75	1
2018-06-28	18	179	2018	6	28	2	30.75	78.8958	2.2766	24.0417	Thursday	0	0.569565	73.1304	18.75	2
2018-06-29	20	180	2018	6	29	2	31.1208	43.125	3	23.8333	Friday	0	0.645833	80.9583	17.9583	1
2018-06-29	20	180	2018	6	29	2	31.1208	43.125	3	23.8333	Friday	0	0.645833	80.9583	17.9583	2
2018-06-30	22	181	2018	6	30	2	30.4542	63.375	2.9375	25.2833	Saturday	0	0.670833	61.7083	16.5833	1
2018-06-30	22	181	2018	6	30	2	30.4542	63.375	2.9375	25.2833	Saturday	0	0.670833	61.7083	16.5833	2
2018-07-01	10	182	2018	7	1	2	30.4625	74.9375	2.875	24.8292	Sunday	0	0.7	69	17.7083	1
2018-07-01	10	182	2018	7	1	2	30.4625	74.9375	2.875	24.8292	Sunday	0	0.7	69	17.7083	2
2018-07-02	20	183	2018	7	2	2	28.4455	82.6875	2.66667	25.1045	Monday	0	0.8	45.8333	18.5833	1
2018-07-02	20	183	2018	7	2	2	28.4455	82.6875	2.66667	25.1045	Monday	0	0.8	45.8333	18.5833	2
2018-07-03	15	184	2018	7	3	2	28.4235	70.1667	2.61702	26.0529	Tuesday	0	0.852174	44.0435	19.3913	1
2018-07-03	15	184	2018	7	3	2	28.4235	70.1667	2.61702	26.0529	Tuesday	0	0.852174	44.0435	19.3913	2
2018-07-04	16	185	2018	7	4	2	31.3542	59.7292	3.58333	25.4208	Wednesday	0	0.783333	67.0417	18.2083	1
2018-07-04	16	185	2018	7	4	2	31.3542	59.7292	3.58333	25.4208	Wednesday	0	0.783333	67.0417	18.2083	2
2018-07-05	12	186	2018	7	5	2	29.9083	69.5833	3.23913	25.8458	Thursday	0	0.695652	52.0435	18.0833	1
2018-07-05	12	186	2018	7	5	2	29.9083	69.5833	3.23913	25.8458	Thursday	0	0.695652	52.0435	18.0833	2
2018-07-06	20	187	2018	7	6	2	28.4167	39.0833	2.60465	25.45	Friday	0	0.641667	46.3913	18.2083	1
2018-07-06	20	187	2018	7	6	2	28.4167	39.0833	2.60465	25.45	Friday	0	0.641667	46.3913	18.2083	2
2018-07-07	19	188	2018	7	7	2	25.9458	80.7708	2.08511	24.7	Saturday	0	0.720833	28	17.375	1
2018-07-07	19	188	2018	7	7	2	25.9458	80.7708	2.08511	24.7	Saturday	0	0.720833	28	17.375	2
2018-07-08	16	189	2018	7	8	2	28.1238	73.375	2.47917	24.681	Sunday	0	0.779167	34.75	24.625	1
2018-07-08	16	189	2018	7	8	2	28.1238	73.375	2.47917	24.681	Sunday	0	0.779167	34.75	24.625	2
2018-07-09	21	190	2018	7	9	2	28.5292	67.9167	2.72917	24.2125	Monday	0	0.659091	30.2273	15.8333	1
2018-07-09	21	190	2018	7	9	2	28.5292	67.9167	2.72917	24.2125	Monday	0	0.659091	30.2273	15.8333	2
2018-07-10	13	191	2018	7	10	2	30.5542	79.7083	1.91489	23.625	Tuesday	0	0.604545	68.0909	20.4583	1
2018-07-10	13	191	2018	7	10	2	30.5542	79.7083	1.91489	23.625	Tuesday	0	0.604545	68.0909	20.4583	2
2018-07-11	11	192	2018	7	11	2	31.8042	60.6667	2.125	24.5667	Wednesday	0	0.695833	134.333	37.1667	1
2018-07-11	11	192	2018	7	11	2	31.8042	60.6667	2.125	24.5667	Wednesday	0	0.695833	134.333	37.1667	2
2018-07-12	14	193	2018	7	12	2	30.5833	74	2.77083	23.8	Thursday	0	0.61	74.3913	15.7083	1
2018-07-12	14	193	2018	7	12	2	30.5833	74	2.77083	23.8	Thursday	0	0.61	74.3913	15.7083	2
2018-07-13	18	194	2018	7	13	2	27.6	51.6875	3.27083	24.6792	Friday	0	0.361538	44.4167	12.9167	1
2018-07-13	18	194	2018	7	13	2	27.6	51.6875	3.27083	24.6792	Friday	0	0.361538	44.4167	12.9167	2
2018-07-14	20	195	2018	7	14	2	27.3708	90.875	2.72917	24.3792	Saturday	0	0.554167	20.9167	12.2083	1
2018-07-14	20	195	2018	7	14	2	27.3708	90.875	2.72917	24.3792	Saturday	0	0.554167	20.9167	12.2083	2
2018-07-15	25	196	2018	7	15	2	27.7042	75.3125	2.83333	24.0083	Sunday	0	0.9125	33.125	11.25	1
2018-07-15	25	196	2018	7	15	2	27.7042	75.3125	2.83333	24.0083	Sunday	0	0.9125	33.125	11.25	2
2018-07-16	24	197	2018	7	16	2	29.575	62.4792	2.14583	23.8042	Monday	0	0.869565	63.625	19.9583	1
2018-07-16	24	197	2018	7	16	2	29.575	62.4792	2.14583	23.8042	Monday	0	0.869565	63.625	19.9583	2
2018-07-17	18	198	2018	7	17	2	31.525	78.0417	2.72917	24.2	Tuesday	0	0.817391	76.7917	30.2917	1
2018-07-17	18	198	2018	7	17	2	31.525	78.0417	2.72917	24.2	Tuesday	0	0.817391	76.7917	30.2917	2
2018-07-18	14	199	2018	7	18	2	30.0958	64.7292	2.89583	23.6292	Wednesday	0	0.708333	46.4583	15.1667	1
2018-07-18	14	199	2018	7	18	2	30.0958	64.7292	2.89583	23.6292	Wednesday	0	0.708333	46.4583	15.1667	2
2018-07-19	17	200	2018	7	19	2	30.1083	77.875	2.9375	23.8542	Thursday	0	0.686957	55.7391	16.1667	1
2018-07-19	17	200	2018	7	19	2	30.1083	77.875	2.9375	23.8542	Thursday	0	0.686957	55.7391	16.1667	2
2018-07-20	14	201	2018	7	20	2	30.8917	57.125	2.85417	23.9583	Friday	0	0.691667	67.2917	13.7917	1
2018-07-20	14	201	2018	7	20	2	30.8917	57.125	2.85417	23.9583	Friday	0	0.691667	67.2917	13.7917	2
2018-07-21	14	202	2018	7	21	2	30.8042	85.9583	2.20833	24.2833	Saturday	0	0.675	90.1667	25.5417	1
2018-07-21	14	202	2018	7	21	2	30.8042	85.9583	2.20833	24.2833	Saturday	0	0.675	90.1667	25.5417	2
2018-07-22	20	203	2018	7	22	2	30.4792	82.8125	2.54167	22.5625	Sunday	0	0.595833	65.0417	16.6667	1
2018-07-22	20	203	2018	7	22	2	30.4792	82.8125	2.54167	22.5625	Sunday	0	0.595833	65.0417	16.6667	2
2018-07-23	23	204	2018	7	23	2	27.4792	58.25	3.16667	24.9917	Monday	0	0.811765	15.4706	16.5882	1
2018-07-23	23	204	2018	7	23	2	27.4792	58.25	3.16667	24.9917	Monday	0	0.811765	15.4706	16.5882	2
2018-07-24	16	205	2018	7	24	2	27.5333	83.6667	3.25	25.6208	Tuesday	0	0.895833	36.3333	14.875	1
2018-07-24	16	205	2018	7	24	2	27.5333	83.6667	3.25	25.6208	Tuesday	0	0.895833	36.3333	14.875	2
2018-07-25	17	206	2018	7	25	2	28.025	59.8298	2.33333	24.8583	Wednesday	0	0.831818	33.8261	22.1667	1
2018-07-25	17	206	2018	7	25	2	28.025	59.8298	2.33333	24.8583	Wednesday	0	0.831818	33.8261	22.1667	2
2018-07-26	17	207	2018	7	26	2	27.3792	73.9565	1.95833	25.2083	Thursday	0	0.75	33.4583	28.7917	1
2018-07-26	17	207	2018	7	26	2	27.3792	73.9565	1.95833	25.2083	Thursday	0	0.75	33.4583	28.7917	2
2018-07-27	19	208	2018	7	27	2	29.3292	71.7021	2.14583	24.6583	Friday	0	0.625	44.625	17.5833	1
2018-07-27	19	208	2018	7	27	2	29.3292	71.7021	2.14583	24.6583	Friday	0	0.625	44.625	17.5833	2
2018-07-28	17	209	2018	7	28	2	30.5417	89.9375	2.31915	23.9792	Saturday	0	0.608333	44.1667	13.875	1
2018-07-28	17	209	2018	7	28	2	30.5417	89.9375	2.31915	23.9792	Saturday	0	0.608333	44.1667	13.875	2
2018-07-29	20	210	2018	7	29	2	29.9292	72.1875	2.125	23.9792	Sunday	0	0.729167	44.0833	14.5417	1
2018-07-29	20	210	2018	7	29	2	29.9292	72.1875	2.125	23.9792	Sunday	0	0.729167	44.0833	14.5417	2
2018-07-30	18	211	2018	7	30	2	29.4208	58.3542	1.97917	24.05	Monday	0	0.975	50.7917	18.8333	1
2018-07-30	18	211	2018	7	30	2	29.4208	58.3542	1.97917	24.05	Monday	0	0.975	50.7917	18.8333	2
2018-07-31	17	212	2018	7	31	2	29.5667	80.75	2.14583	24.6792	Tuesday	0	1.00833	55.2083	21.5833	1
2018-07-31	17	212	2018	7	31	2	29.5667	80.75	2.14583	24.6792	Tuesday	0	1.00833	55.2083	21.5833	2
2018-08-01	10	213	2018	8	1	2	30.9208	69.9362	2.22917	24.5667	Wednesday	0	0.933333	71.2917	18.4583	1
2018-08-01	10	213	2018	8	1	2	30.9208	69.9362	2.22917	24.5667	Wednesday	0	0.933333	71.2917	18.4583	2
2018-08-02	22	214	2018	8	2	2	28.7208	67.6875	2.45833	25.0458	Thursday	0	0.73913	69.375	20.5833	1
2018-08-02	22	214	2018	8	2	2	28.7208	67.6875	2.45833	25.0458	Thursday	0	0.73913	69.375	20.5833	2
2018-08-03	17	215	2018	8	3	2	27.8667	59.6875	2.02083	25.2667	Friday	0	0.616667	40.5833	22.7917	1
2018-08-03	17	215	2018	8	3	2	27.8667	59.6875	2.02083	25.2667	Friday	0	0.616667	40.5833	22.7917	2
2018-08-04	15	216	2018	8	4	2	30.1417	90.1875	1.75	25.1292	Saturday	0	0.695238	82.7619	23.7619	1
2018-08-04	15	216	2018	8	4	2	30.1417	90.1875	1.75	25.1292	Saturday	0	0.695238	82.7619	23.7619	2
2018-08-05	20	217	2018	8	5	2	29.6417	76.2292	1.97917	25.1083	Sunday	0	0.619048	91.5714	24.381	1
2018-08-05	20	217	2018	8	5	2	29.6417	76.2292	1.97917	25.1083	Sunday	0	0.619048	91.5714	24.381	2
2018-08-06	14	218	2018	8	6	2	29.1083	66.7083	2.375	23.8208	Monday	0	0.73	95.35	34.15	1
2018-08-06	14	218	2018	8	6	2	29.1083	66.7083	2.375	23.8208	Monday	0	0.73	95.35	34.15	2
2018-08-07	14	219	2018	8	7	2	29.0125	51.7708	2	23.3958	Tuesday	0	0.895238	128.143	46.6667	1
2018-08-07	14	219	2018	8	7	2	29.0125	51.7708	2	23.3958	Tuesday	0	0.895238	128.143	46.6667	2
2018-08-08	13	220	2018	8	8	2	31.2273	50.1489	1.9375	23.6909	Wednesday	0	0.738095	94.8095	25.2381	1
2018-08-08	13	220	2018	8	8	2	31.2273	50.1489	1.9375	23.6909	Wednesday	0	0.738095	94.8095	25.2381	2
2018-08-09	14	221	2018	8	9	2	31.4	69.6042	2.9375	23.05	Thursday	0	0.505	86.4737	22.1	1
2018-08-09	14	221	2018	8	9	2	31.4	69.6042	2.9375	23.05	Thursday	0	0.505	86.4737	22.1	2
2018-08-10	19	222	2018	8	10	2	28.7625	64.0833	3.75	24.3417	Friday	0	0.509524	46.4762	14.9048	1
2018-08-10	19	222	2018	8	10	2	28.7625	64.0833	3.75	24.3417	Friday	0	0.509524	46.4762	14.9048	2
2018-08-11	17	223	2018	8	11	2	28.15	88.1667	3.10417	24.9542	Saturday	0	0.566667	37.4286	14.4762	1
2018-08-11	17	223	2018	8	11	2	28.15	88.1667	3.10417	24.9542	Saturday	0	0.566667	37.4286	14.4762	2
2018-08-12	15	224	2018	8	12	2	29.3083	80.6458	2.08333	24.7333	Sunday	0	0.665	47.7	20.25	1
2018-08-12	15	224	2018	8	12	2	29.3083	80.6458	2.08333	24.7333	Sunday	0	0.665	47.7	20.25	2
2018-08-13	16	225	2018	8	13	2	29.4818	63.383	2.39583	25.05	Monday	0	0.625	84.1	27.3333	1
2018-08-13	16	225	2018	8	13	2	29.4818	63.383	2.39583	25.05	Monday	0	0.625	84.1	27.3333	2
2018-08-14	20	226	2018	8	14	2	30.013	56.0625	3.08333	24.6565	Tuesday	0	0.547619	65.0476	19.2857	1
2018-08-14	20	226	2018	8	14	2	30.013	56.0625	3.08333	24.6565	Tuesday	0	0.547619	65.0476	19.2857	2
2018-08-15	14	227	2018	8	15	2	28.4917	42.2083	3.375	24.6208	Wednesday	0	0.609524	85.2857	19.0952	1
2018-08-15	14	227	2018	8	15	2	28.4917	42.2083	3.375	24.6208	Wednesday	0	0.609524	85.2857	19.0952	2
2018-08-16	18	228	2018	8	16	2	28.4875	79.375	3.375	24.5667	Thursday	0	0.595	58.3684	17.5	1
2018-08-16	18	228	2018	8	16	2	28.4875	79.375	3.375	24.5667	Thursday	0	0.595	58.3684	17.5	2
2018-08-17	25	229	2018	8	17	2	27.6292	63.8125	2.16667	24.7958	Friday	0	0.631579	70.8421	24.2105	1
2018-08-17	25	229	2018	8	17	2	27.6292	63.8125	2.16667	24.7958	Friday	0	0.631579	70.8421	24.2105	2
2018-08-18	18	230	2018	8	18	2	28.6458	85.3542	1.70833	25.2833	Saturday	0	0.747619	82.2381	30.0476	1
2018-08-18	18	230	2018	8	18	2	28.6458	85.3542	1.70833	25.2833	Saturday	0	0.747619	82.2381	30.0476	2
2018-08-19	9	231	2018	8	19	2	28.3292	76.9375	1.66667	24.8625	Sunday	0	0.766667	87.1905	24.3333	1
2018-08-19	9	231	2018	8	19	2	28.3292	76.9375	1.66667	24.8625	Sunday	0	0.766667	87.1905	24.3333	2
2018-08-20	10	232	2018	8	20	2	28.7833	66.0417	1.60417	25.4625	Monday	0	0.92381	95.2857	38.8095	1
2018-08-20	10	232	2018	8	20	2	28.7833	66.0417	1.60417	25.4625	Monday	0	0.92381	95.2857	38.8095	2
2018-08-21	10	233	2018	8	21	2	29.7667	35.4792	2.29167	24.7833	Tuesday	0	0.878947	149.105	44.3158	1
2018-08-21	10	233	2018	8	21	2	29.7667	35.4792	2.29167	24.7833	Tuesday	0	0.878947	149.105	44.3158	2
2018-08-22	9	234	2018	8	22	2	28.5708	45.1875	2.14583	25.1042	Wednesday	0	0.815789	98.4737	23.4211	1
2018-08-22	9	234	2018	8	22	2	28.5708	45.1875	2.14583	25.1042	Wednesday	0	0.815789	98.4737	23.4211	2
2018-08-23	13	235	2018	8	23	2	29.3167	81.25	1.77083	24.6792	Thursday	0	0.994444	136.588	52.3889	1
2018-08-23	13	235	2018	8	23	2	29.3167	81.25	1.77083	24.6792	Thursday	0	0.994444	136.588	52.3889	2
2018-08-24	14	236	2018	8	24	2	31.3	65.2083	2.5625	23.7292	Friday	0	1.09231	104.615	53.7692	1
2018-08-24	14	236	2018	8	24	2	31.3	65.2083	2.5625	23.7292	Friday	0	1.09231	104.615	53.7692	2
2018-08-25	19	237	2018	8	25	2	31.2708	77.6667	3.47917	20.9792	Saturday	0	0.935294	146.176	35.2941	1
2018-08-25	19	237	2018	8	25	2	31.2708	77.6667	3.47917	20.9792	Saturday	0	0.935294	146.176	35.2941	2
2018-08-26	7	238	2018	8	26	2	28.1083	73.1042	3.60417	22.425	Sunday	0	1.1	54	54.5	1
2018-08-26	7	238	2018	8	26	2	28.1083	73.1042	3.60417	22.425	Sunday	0	1.1	54	54.5	2
2018-08-27	15	239	2018	8	27	2	26.6958	75.0417	2.25	24.4542	Monday	0	1.14706	69.5294	34.3529	1
2018-08-27	15	239	2018	8	27	2	26.6958	75.0417	2.25	24.4542	Monday	0	1.14706	69.5294	34.3529	2
2018-08-28	13	240	2018	8	28	2	25.4208	30.2292	2.39583	24.075	Tuesday	0	0.95	91.75	22.5	1
2018-08-28	13	240	2018	8	28	2	25.4208	30.2292	2.39583	24.075	Tuesday	0	0.95	91.75	22.5	2
2018-08-29	8	241	2018	8	29	2	26.25	52.7292	2.625	24.1833	Wednesday	0	0.794118	66.3125	11.4118	1
2018-08-29	8	241	2018	8	29	2	26.25	52.7292	2.625	24.1833	Wednesday	0	0.794118	66.3125	11.4118	2
2018-08-30	11	242	2018	8	30	2	25.6708	87.8125	2.33333	24.3083	Thursday	0	0.65	32	7.5	1
2018-08-30	11	242	2018	8	30	2	25.6708	87.8125	2.33333	24.3083	Thursday	0	0.65	32	7.5	2
2018-08-31	10	243	2018	8	31	2	25.7375	67.625	2.3125	24.3	Friday	0	0.521429	38.2857	15.6429	1
2018-08-31	10	243	2018	8	31	2	25.7375	67.625	2.3125	24.3	Friday	0	0.521429	38.2857	15.6429	2
2018-09-01	8	244	2018	9	1	3	25.7917	71.0833	2.04167	24.1125	Saturday	0	0.525	5.75	19.75	1
2018-09-01	8	244	2018	9	1	3	25.7917	71.0833	2.04167	24.1125	Saturday	0	0.525	5.75	19.75	2
2018-09-02	6	245	2018	9	2	3	26.225	85.25	1.85417	24.1792	Sunday	0	0.492857	45.2143	16.4286	1
2018-09-02	6	245	2018	9	2	3	26.225	85.25	1.85417	24.1792	Sunday	0	0.492857	45.2143	16.4286	2
2018-09-03	11	246	2018	9	3	3	28.2292	83.3333	1.875	24.2708	Monday	0	0.475	60.6667	17.6667	1
2018-09-03	11	246	2018	9	3	3	28.2292	83.3333	1.875	24.2708	Monday	0	0.475	60.6667	17.6667	2
2018-09-04	11	247	2018	9	4	3	30.1167	24.9167	1.58333	24.75	Tuesday	0	0.5375	77	23.0833	1
2018-09-04	11	247	2018	9	4	3	30.1167	24.9167	1.58333	24.75	Tuesday	0	0.5375	77	23.0833	2
2018-09-05	11	248	2018	9	5	3	29.9375	52.7826	2.14894	24.8333	Wednesday	0	0.5875	93.6667	28.4583	1
2018-09-05	11	248	2018	9	5	3	29.9375	52.7826	2.14894	24.8333	Wednesday	0	0.5875	93.6667	28.4583	2
2018-09-06	13	249	2018	9	6	3	29.3	87	2.625	24.3875	Thursday	0	0.641667	96.0435	30.25	1
2018-09-06	13	249	2018	9	6	3	29.3	87	2.625	24.3875	Thursday	0	0.641667	96.0435	30.25	2
2018-09-07	12	250	2018	9	7	3	27.3667	45.8298	2.5	23.225	Friday	0	0.7625	104.417	32.125	1
2018-09-07	12	250	2018	9	7	3	27.3667	45.8298	2.5	23.225	Friday	0	0.7625	104.417	32.125	2
2018-09-08	12	251	2018	9	8	3	26.6417	70.3404	4.20833	19.6125	Saturday	0	0.720833	85.1667	23.3333	1
2018-09-08	12	251	2018	9	8	3	26.6417	70.3404	4.20833	19.6125	Saturday	0	0.720833	85.1667	23.3333	2
2018-09-09	11	252	2018	9	9	3	27.275	72.3125	3.95833	19.9667	Sunday	0	0.6625	96.0833	30.2083	1
2018-09-09	11	252	2018	9	9	3	27.275	72.3125	3.95833	19.9667	Sunday	0	0.6625	96.0833	30.2083	2
2018-09-10	20	253	2018	9	10	3	26.9375	73.6875	2.04167	20.3583	Monday	0	0.820833	64.7917	30.5	1
2018-09-10	20	253	2018	9	10	3	26.9375	73.6875	2.04167	20.3583	Monday	0	0.820833	64.7917	30.5	2
2018-09-11	9	254	2018	9	11	3	28.2087	27.2917	2.97917	18.2217	Tuesday	0	0.791304	92.6522	35.3478	1
2018-09-11	9	254	2018	9	11	3	28.2087	27.2917	2.97917	18.2217	Tuesday	0	0.791304	92.6522	35.3478	2
2018-09-12	10	255	2018	9	12	3	27.6208	46.5417	3.70213	22.0125	Wednesday	0	0.725	77.4167	30.6667	1
2018-09-12	10	255	2018	9	12	3	27.6208	46.5417	3.70213	22.0125	Wednesday	0	0.725	77.4167	30.6667	2
2018-09-13	16	256	2018	9	13	3	28.4391	81.7292	2.29167	23.887	Thursday	0	0.645833	54.4783	21	1
2018-09-13	16	256	2018	9	13	3	28.4391	81.7292	2.29167	23.887	Thursday	0	0.645833	54.4783	21	2
2018-09-14	12	257	2018	9	14	3	30.9625	27.3958	2.77083	23.9375	Friday	0	0.704167	67.8333	25.4167	1
2018-09-14	12	257	2018	9	14	3	30.9625	27.3958	2.77083	23.9375	Friday	0	0.704167	67.8333	25.4167	2
2018-09-15	20	258	2018	9	15	3	33.7	73.8958	5.47917	21.6529	Saturday	0	0.65	73.2083	30.5	1
2018-09-15	20	258	2018	9	15	3	33.7	73.8958	5.47917	21.6529	Saturday	0	0.65	73.2083	30.5	2
2018-09-16	13	259	2018	9	16	3	25.5316	70.9375	11	23.3053	Sunday	0	0.529167	53.2917	9.75	1
2018-09-16	13	259	2018	9	16	3	25.5316	70.9375	11	23.3053	Sunday	0	0.529167	53.2917	9.75	2
2018-09-17	11	260	2018	9	17	3	27.6667	73.5625	4.875	24.3667	Monday	0	0.531579	46.3684	8.15789	1
2018-09-17	11	260	2018	9	17	3	27.6667	73.5625	4.875	24.3667	Monday	0	0.531579	46.3684	8.15789	2
2018-09-18	19	261	2018	9	18	3	26.9	39.4375	2.66667	23.6143	Tuesday	0	0.554167	42.4167	10.9167	1
2018-09-18	19	261	2018	9	18	3	26.9	39.4375	2.66667	23.6143	Tuesday	0	0.554167	42.4167	10.9167	2
2018-09-19	15	262	2018	9	19	3	29.1955	36.7917	1.79167	23.4545	Wednesday	0	0.816667	68.3333	27.7917	1
2018-09-19	15	262	2018	9	19	3	29.1955	36.7917	1.79167	23.4545	Wednesday	0	0.816667	68.3333	27.7917	2
2018-09-20	13	263	2018	9	20	3	29.1588	82.5625	1.79167	24.6706	Thursday	0	0.9375	98.1667	41.7917	1
2018-09-20	13	263	2018	9	20	3	29.1588	82.5625	1.79167	24.6706	Thursday	0	0.9375	98.1667	41.7917	2
2018-09-21	12	264	2018	9	21	3	29.5292	23.3958	1.85417	24.3333	Friday	0	0.721739	98.913	35.2083	1
2018-09-21	12	264	2018	9	21	3	29.5292	23.3958	1.85417	24.3333	Friday	0	0.721739	98.913	35.2083	2
2018-09-22	19	265	2018	9	22	3	29.475	76.625	1.75	23.8625	Saturday	0	0.754167	88.75	30.8333	1
2018-09-22	19	265	2018	9	22	3	29.475	76.625	1.75	23.8625	Saturday	0	0.754167	88.75	30.8333	2
2018-09-23	6	266	2018	9	23	3	28.6909	72.7708	2.3125	24.4136	Sunday	0	0.566667	51.3913	23.8333	1
2018-09-23	6	266	2018	9	23	3	28.6909	72.7708	2.3125	24.4136	Sunday	0	0.566667	51.3913	23.8333	2
2018-09-24	16	267	2018	9	24	3	25.025	69.0208	2.27083	23.225	Monday	1	0.635	57.5	22.65	1
2018-09-24	16	267	2018	9	24	3	25.025	69.0208	2.27083	23.225	Monday	1	0.635	57.5	22.65	2
2018-09-25	20	268	2018	9	25	3	26.8542	35.9167	2.16667	23.1958	Tuesday	0	0.65625	88.5	21.3125	1
2018-09-25	20	268	2018	9	25	3	26.8542	35.9167	2.16667	23.1958	Tuesday	0	0.65625	88.5	21.3125	2
2018-09-26	14	269	2018	9	26	3	28.6333	40	1.8125	22.8167	Wednesday	0	0.666667	101.458	28.7917	1
2018-09-26	14	269	2018	9	26	3	28.6333	40	1.8125	22.8167	Wednesday	0	0.666667	101.458	28.7917	2
2018-09-27	8	270	2018	9	27	3	27.2542	71.7234	2.6875	20.8542	Thursday	0	0.673913	67.5217	36.9524	1
2018-09-27	8	270	2018	9	27	3	27.2542	71.7234	2.6875	20.8542	Thursday	0	0.673913	67.5217	36.9524	2
2018-09-28	17	271	2018	9	28	3	24.2875	37.2708	4.39583	18.275	Friday	0	0.47619	58.5238	29.8571	1
2018-09-28	17	271	2018	9	28	3	24.2875	37.2708	4.39583	18.275	Friday	0	0.47619	58.5238	29.8571	2
2018-09-29	17	272	2018	9	29	3	25.6208	67.2708	4.29167	17.4292	Saturday	0	0.454167	85.4583	27.75	1
2018-09-29	17	272	2018	9	29	3	25.6208	67.2708	4.29167	17.4292	Saturday	0	0.454167	85.4583	27.75	2
2018-09-30	16	273	2018	9	30	3	25.4708	73.5208	3.4375	15.4417	Sunday	0	0.5125	104.167	30.6667	1
2018-09-30	16	273	2018	9	30	3	25.4708	73.5208	3.4375	15.4417	Sunday	0	0.5125	104.167	30.6667	2
2018-10-01	14	274	2018	10	1	3	25.8917	76.3542	2.3125	14.6333	Monday	1	0.675	103.458	33.4167	1
2018-10-01	14	274	2018	10	1	3	25.8917	76.3542	2.3125	14.6333	Monday	1	0.675	103.458	33.4167	2
2018-10-02	18	275	2018	10	2	3	25.3958	66.9583	2.41667	13.4292	Tuesday	1	0.795833	117	32.625	1
2018-10-02	18	275	2018	10	2	3	25.3958	66.9583	2.41667	13.4292	Tuesday	1	0.795833	117	32.625	2
2018-10-03	23	276	2018	10	3	3	25.5208	46.3958	2.9375	12.3375	Wednesday	1	0.952174	113.957	34.913	1
2018-10-03	23	276	2018	10	3	3	25.5208	46.3958	2.9375	12.3375	Wednesday	1	0.952174	113.957	34.913	2
2018-10-04	18	277	2018	10	4	3	25.5208	76.7234	3.75	11.775	Thursday	1	0.795	112.762	34.8261	1
2018-10-04	18	277	2018	10	4	3	25.5208	76.7234	3.75	11.775	Thursday	1	0.795	112.762	34.8261	2
2018-10-05	8	278	2018	10	5	3	24.575	39.6458	3.77083	11.1875	Friday	1	0.654167	140.458	36.0417	1
2018-10-05	8	278	2018	10	5	3	24.575	39.6458	3.77083	11.1875	Friday	1	0.654167	140.458	36.0417	2
2018-10-06	19	279	2018	10	6	3	24.6917	58.1042	3.33333	11.8458	Saturday	1	0.690909	113	29.4167	1
2018-10-06	19	279	2018	10	6	3	24.6917	58.1042	3.33333	11.8458	Saturday	1	0.690909	113	29.4167	2
2018-10-07	21	280	2018	10	7	3	25.5417	72.5625	1.83333	15.5583	Sunday	1	0.920833	100.5	48.0833	1
2018-10-07	21	280	2018	10	7	3	25.5417	72.5625	1.83333	15.5583	Sunday	1	0.920833	100.5	48.0833	2
2018-10-08	14	281	2018	10	8	3	26.4083	81.4792	1.60417	19.9417	Monday	0	0.766667	138.125	66.4167	1
2018-10-08	14	281	2018	10	8	3	26.4083	81.4792	1.60417	19.9417	Monday	0	0.766667	138.125	66.4167	2
2018-10-09	16	282	2018	10	9	3	26.8125	76.9375	1.54167	20.9875	Tuesday	0	0.5125	125.5	44.6667	1
2018-10-09	16	282	2018	10	9	3	26.8125	76.9375	1.54167	20.9875	Tuesday	0	0.5125	125.5	44.6667	2
2018-10-10	23	283	2018	10	10	3	20.6458	42.0417	3.4375	17.1125	Wednesday	0	0.5875	63.2917	48.625	1
2018-10-10	23	283	2018	10	10	3	20.6458	42.0417	3.4375	17.1125	Wednesday	0	0.5875	63.2917	48.625	2
2018-10-11	13	284	2018	10	11	3	20.4542	85.5833	4.39583	14.2375	Thursday	0	0.630435	63.375	21.4167	1
2018-10-11	13	284	2018	10	11	3	20.4542	85.5833	4.39583	14.2375	Thursday	0	0.630435	63.375	21.4167	2
2018-10-12	11	285	2018	10	12	3	22.4167	31.25	2.27083	15.9625	Friday	0	0.775	55.1667	32.0833	1
2018-10-12	11	285	2018	10	12	3	22.4167	31.25	2.27083	15.9625	Friday	0	0.775	55.1667	32.0833	2
2018-10-13	8	286	2018	10	13	3	22.7417	60.8333	1.54167	18.2958	Saturday	0	0.854167	45.75	35.5417	1
2018-10-13	8	286	2018	10	13	3	22.7417	60.8333	1.54167	18.2958	Saturday	0	0.854167	45.75	35.5417	2
2018-10-14	7	287	2018	10	14	3	24.9	70.1064	1.77083	20.6625	Sunday	0	0.786364	50.2727	34.7273	1
2018-10-14	7	287	2018	10	14	3	24.9	70.1064	1.77083	20.6625	Sunday	0	0.786364	50.2727	34.7273	2
2018-10-15	17	288	2018	10	15	3	21.7375	86.0833	2.54167	19.8917	Monday	0	0.558333	23.625	25.6667	1
2018-10-15	17	288	2018	10	15	3	21.7375	86.0833	2.54167	19.8917	Monday	0	0.558333	23.625	25.6667	2
2018-10-16	9	289	2018	10	16	3	21.0667	49.8958	3.27083	18.1667	Tuesday	0	0.766667	22.2917	15.6667	1
2018-10-16	9	289	2018	10	16	3	21.0667	49.8958	3.27083	18.1667	Tuesday	0	0.766667	22.2917	15.6667	2
2018-10-17	10	290	2018	10	17	3	20.4292	38.2917	2.71739	17.7875	Wednesday	0	0.682609	15.2609	13.087	1
2018-10-17	10	290	2018	10	17	3	20.4292	38.2917	2.71739	17.7875	Wednesday	0	0.682609	15.2609	13.087	2
2018-10-18	12	291	2018	10	18	3	21.625	88.1667	1.8125	17.6833	Thursday	0	0.617391	19.625	23	1
2018-10-18	12	291	2018	10	18	3	21.625	88.1667	1.8125	17.6833	Thursday	0	0.617391	19.625	23	2
2018-10-19	15	292	2018	10	19	3	23.1474	36.0417	2.20833	19.2211	Friday	0	0.791667	40.5417	35.3333	1
2018-10-19	15	292	2018	10	19	3	23.1474	36.0417	2.20833	19.2211	Friday	0	0.791667	40.5417	35.3333	2
2018-10-20	10	293	2018	10	20	3	23.6458	54.6875	1.45833	20.7458	Saturday	0	0.775	42.25	43.2917	1
2018-10-20	10	293	2018	10	20	3	23.6458	54.6875	1.45833	20.7458	Saturday	0	0.775	42.25	43.2917	2
2018-10-21	11	294	2018	10	21	3	25.7261	78	2.10417	20.2957	Sunday	0	0.48	72.9	26.25	1
2018-10-21	11	294	2018	10	21	3	25.7261	78	2.10417	20.2957	Sunday	0	0.48	72.9	26.25	2
2018-10-22	18	295	2018	10	22	3	23.7083	85.1667	2.45833	19.9917	Monday	0	0.554167	52.2083	33.7917	1
2018-10-22	18	295	2018	10	22	3	23.7083	85.1667	2.45833	19.9917	Monday	0	0.554167	52.2083	33.7917	2
2018-10-23	14	296	2018	10	23	3	22.225	34.9583	3.375	17.39	Tuesday	0	0.770833	28.7083	23	1
2018-10-23	14	296	2018	10	23	3	22.225	34.9583	3.375	17.39	Tuesday	0	0.770833	28.7083	23	2
2018-10-24	19	297	2018	10	24	3	23.0826	46.0417	1.65957	18.887	Wednesday	0	0.863158	24.2105	33.9	1
2018-10-24	19	297	2018	10	24	3	23.0826	46.0417	1.65957	18.887	Wednesday	0	0.863158	24.2105	33.9	2
2018-10-25	9	298	2018	10	25	3	24.9208	88.6809	1.33333	21.3792	Thursday	0	1.04762	71.9048	57.2857	1
2018-10-25	9	298	2018	10	25	3	24.9208	88.6809	1.33333	21.3792	Thursday	0	1.04762	71.9048	57.2857	2
2018-10-26	17	299	2018	10	26	3	24.1833	38.1667	2.6875	19.2	Friday	0	0.847059	40.625	50.1176	1
2018-10-26	17	299	2018	10	26	3	24.1833	38.1667	2.6875	19.2	Friday	0	0.847059	40.625	50.1176	2
2018-10-27	9	300	2018	10	27	3	22.925	61.2128	3.77083	11.225	Saturday	0	0.616667	76.2917	20.2917	1
2018-10-27	9	300	2018	10	27	3	22.925	61.2128	3.77083	11.225	Saturday	0	0.616667	76.2917	20.2917	2
2018-10-28	13	301	2018	10	28	3	22.0208	85.5417	2.47917	9.34583	Sunday	0	0.808333	75.5	24.6667	1
2018-10-28	13	301	2018	10	28	3	22.0208	85.5417	2.47917	9.34583	Sunday	0	0.808333	75.5	24.6667	2
2018-10-29	22	302	2018	10	29	3	22.9391	85.7292	2.97917	8.96087	Monday	0	0.786957	59.8261	24.6364	1
2018-10-29	22	302	2018	10	29	3	22.9391	85.7292	2.97917	8.96087	Monday	0	0.786957	59.8261	24.6364	2
2018-10-30	16	303	2018	10	30	3	23.7417	42.5833	4.73913	5.9125	Tuesday	0	0.570833	77.25	25.875	1
2018-10-30	16	303	2018	10	30	3	23.7417	42.5833	4.73913	5.9125	Tuesday	0	0.570833	77.25	25.875	2
2018-10-31	14	304	2018	10	31	3	23.9958	48.8511	6.16667	3.075	Wednesday	0	0.682609	102.304	24.9565	1
2018-10-31	14	304	2018	10	31	3	23.9958	48.8511	6.16667	3.075	Wednesday	0	0.682609	102.304	24.9565	2
2018-11-01	22	305	2018	11	1	3	21.9708	86.9348	6.45833	9.67083	Thursday	0	0.669565	101.957	38.2609	1
2018-11-01	22	305	2018	11	1	3	21.9708	86.9348	6.45833	9.67083	Thursday	0	0.669565	101.957	38.2609	2
2018-11-02	17	306	2018	11	2	3	18.575	55.3542	4.3125	15.2208	Friday	0	0.604348	82.5217	55.7391	1
2018-11-02	17	306	2018	11	2	3	18.575	55.3542	4.3125	15.2208	Friday	0	0.604348	82.5217	55.7391	2
2018-11-03	13	307	2018	11	3	3	21.6583	70.9583	2.35417	16.9875	Saturday	0	0.3375	39.75	15.25	1
2018-11-03	13	307	2018	11	3	3	21.6583	70.9583	2.35417	16.9875	Saturday	0	0.3375	39.75	15.25	2
2018-11-04	12	308	2018	11	4	3	22.1417	88.7292	1.45833	19.1167	Sunday	0	0.556522	16.9583	36	1
2018-11-04	12	308	2018	11	4	3	22.1417	88.7292	1.45833	19.1167	Sunday	0	0.556522	16.9583	36	2
2018-11-05	13	309	2018	11	5	3	24.7333	85.7917	1.14583	19.8542	Monday	0	0.96087	50.5417	63.625	1
2018-11-05	13	309	2018	11	5	3	24.7333	85.7917	1.14583	19.8542	Monday	0	0.96087	50.5417	63.625	2
2018-11-06	17	310	2018	11	6	3	24.5708	61.3958	1.16667	19.4375	Tuesday	0	0.618182	64.9524	44.0909	1
2018-11-06	17	310	2018	11	6	3	24.5708	61.3958	1.16667	19.4375	Tuesday	0	0.618182	64.9524	44.0909	2
2018-11-07	19	311	2018	11	7	3	23.0583	49.5652	3.04167	17.6625	Wednesday	0	0.66087	45.5217	58.7826	1
2018-11-07	19	311	2018	11	7	3	23.0583	49.5652	3.04167	17.6625	Wednesday	0	0.66087	45.5217	58.7826	2
2018-11-08	26	312	2018	11	8	3	20.6958	80.25	4.47917	14.5292	Thursday	0	0.726087	41.7391	38.3333	1
2018-11-08	26	312	2018	11	8	3	20.6958	80.25	4.47917	14.5292	Thursday	0	0.726087	41.7391	38.3333	2
2018-11-09	16	313	2018	11	9	3	23.3583	44.4468	2.02083	16.3375	Friday	0	0.786957	54.087	31.6087	1
2018-11-09	16	313	2018	11	9	3	23.3583	44.4468	2.02083	16.3375	Friday	0	0.786957	54.087	31.6087	2
2018-11-10	16	314	2018	11	10	3	22.8417	65.6042	1.5625	19.1667	Saturday	0	1.1875	29.75	74.875	1
2018-11-10	16	314	2018	11	10	3	22.8417	65.6042	1.5625	19.1667	Saturday	0	1.1875	29.75	74.875	2
2018-11-11	15	315	2018	11	11	3	24.675	84.7917	1.52083	19.9708	Sunday	0	1.275	56.2083	67.6667	1
2018-11-11	15	315	2018	11	11	3	24.675	84.7917	1.52083	19.9708	Sunday	0	1.275	56.2083	67.6667	2
2018-11-12	21	316	2018	11	12	3	23.0833	93.4792	3.02083	17.1542	Monday	0	0.73913	67.7917	54.4583	1
2018-11-12	21	316	2018	11	12	3	23.0833	93.4792	3.02083	17.1542	Monday	0	0.73913	67.7917	54.4583	2
2018-11-13	19	317	2018	11	13	3	22.9792	72.9167	2.14583	16.6667	Tuesday	0	0.616667	69.9583	31.6957	1
2018-11-13	19	317	2018	11	13	3	22.9792	72.9167	2.14583	16.6667	Tuesday	0	0.616667	69.9583	31.6957	2
2018-11-14	23	318	2018	11	14	3	24.4417	61.125	2.25	18.6083	Wednesday	0	0.491667	81.9167	32.8333	1
2018-11-14	23	318	2018	11	14	3	24.4417	61.125	2.25	18.6083	Wednesday	0	0.491667	81.9167	32.8333	2
2018-11-15	30	319	2018	11	15	3	23.8458	69.1042	1.95833	19.8292	Thursday	0	0.395652	57.7826	25.087	1
2018-11-15	30	319	2018	11	15	3	23.8458	69.1042	1.95833	19.8292	Thursday	0	0.395652	57.7826	25.087	2
2018-11-16	11	320	2018	11	16	3	20.5235	21.2917	2.41667	18.7824	Friday	0	0.641667	23.125	32.25	1
2018-11-16	11	320	2018	11	16	3	20.5235	21.2917	2.41667	18.7824	Friday	0	0.641667	23.125	32.25	2
2018-11-17	15	321	2018	11	17	3	28.125	53.1875	1.77083	16.5	Saturday	0	0.704167	4.75	19.9167	1
2018-11-17	15	321	2018	11	17	3	28.125	53.1875	1.77083	16.5	Saturday	0	0.704167	4.75	19.9167	2
2018-11-18	17	322	2018	11	18	3	28.6875	85.375	2.52083	17.4	Sunday	0	0.95	5.83333	54	1
2018-11-18	17	322	2018	11	18	3	28.6875	85.375	2.52083	17.4	Sunday	0	0.95	5.83333	54	2
2018-11-19	18	323	2018	11	19	3	28.8958	90.2292	3.77083	13.4	Monday	0	0.7125	26.0417	9.95833	1
2018-11-19	18	323	2018	11	19	3	28.8958	90.2292	3.77083	13.4	Monday	0	0.7125	26.0417	9.95833	2
2018-11-20	7	324	2018	11	20	3	28.9375	72.7083	1.95833	14.5	Tuesday	0	1.025	8.95833	48.5	1
2018-11-20	7	324	2018	11	20	3	28.9375	72.7083	1.95833	14.5	Tuesday	0	1.025	8.95833	48.5	2
2018-11-21	10	325	2018	11	21	3	30.2083	62.1064	3.1875	15.4	Wednesday	0	1.35833	14.125	52.375	1
2018-11-21	10	325	2018	11	21	3	30.2083	62.1064	3.1875	15.4	Wednesday	0	1.35833	14.125	52.375	2
2018-11-22	15	326	2018	11	22	3	13.5	63.8222	5.66667	7.5	Thursday	0	0.785714	51.3913	19	1
2018-11-22	15	326	2018	11	22	3	13.5	63.8222	5.66667	7.5	Thursday	0	0.785714	51.3913	19	2
2018-11-23	11	327	2018	11	23	3	17.2917	22.3333	2.5625	10.475	Friday	0	1.02917	59.375	44.5833	1
2018-11-23	11	327	2018	11	23	3	17.2917	22.3333	2.5625	10.475	Friday	0	1.02917	59.375	44.5833	2
2018-11-24	9	328	2018	11	24	3	19.3458	69.8542	1.58333	13.8292	Saturday	0	1.27083	45.1667	55.625	1
2018-11-24	9	328	2018	11	24	3	19.3458	69.8542	1.58333	13.8292	Saturday	0	1.27083	45.1667	55.625	2
2018-11-25	11	329	2018	11	25	3	18.25	84.7292	1.5625	15.0375	Sunday	0	1.19167	31.4583	51.4167	1
2018-11-25	11	329	2018	11	25	3	18.25	84.7292	1.5625	15.0375	Sunday	0	1.19167	31.4583	51.4167	2
2018-11-26	19	330	2018	11	26	3	19.3208	87.375	1.9375	14.0792	Monday	0	1.125	36.5	37.3333	1
2018-11-26	19	330	2018	11	26	3	19.3208	87.375	1.9375	14.0792	Monday	0	1.125	36.5	37.3333	2
2018-11-27	11	331	2018	11	27	3	20.7417	74.7708	1.45833	14.9625	Tuesday	0	1.0875	31.0833	48.2083	1
2018-11-27	11	331	2018	11	27	3	20.7417	74.7708	1.45833	14.9625	Tuesday	0	1.0875	31.0833	48.2083	2
2018-11-28	19	332	2018	11	28	3	18.7333	47.4783	1.54167	14.1917	Wednesday	0	1.25833	9.79167	56.5	1
2018-11-28	19	332	2018	11	28	3	18.7333	47.4783	1.54167	14.1917	Wednesday	0	1.25833	9.79167	56.5	2
2018-11-29	22	333	2018	11	29	3	19.4167	67.75	1.52083	11.7	Thursday	0	1.1913	32.6087	55.9583	1
2018-11-29	22	333	2018	11	29	3	19.4167	67.75	1.52083	11.7	Thursday	0	1.1913	32.6087	55.9583	2
2018-11-30	18	334	2018	11	30	3	21.3833	44.6042	1.5625	16.4292	Friday	0	1.02917	78.7917	80.2083	1
2018-11-30	18	334	2018	11	30	3	21.3833	44.6042	1.5625	16.4292	Friday	0	1.02917	78.7917	80.2083	2
2018-12-01	16	335	2018	12	1	4	20.5	80.4167	1.875	17.8708	Saturday	0	0.766667	49.3333	62.2083	1
2018-12-01	16	335	2018	12	1	4	20.5	80.4167	1.875	17.8708	Saturday	0	0.766667	49.3333	62.2083	2
2018-12-02	34	336	2018	12	2	4	22.5	75	2.04167	17.1625	Sunday	0	0.675	41.75	51.0417	1
2018-12-02	34	336	2018	12	2	4	22.5	75	2.04167	17.1625	Sunday	0	0.675	41.75	51.0417	2
2018-12-03	16	337	2018	12	3	4	22.8167	81.8333	1.58333	18.675	Monday	0	0.516667	37.125	28.5	1
2018-12-03	16	337	2018	12	3	4	22.8167	81.8333	1.58333	18.675	Monday	0	0.516667	37.125	28.5	2
2018-12-04	18	338	2018	12	4	4	23.7375	70.2083	1.33333	18.6417	Tuesday	0	0.7625	48.8333	41.0833	1
2018-12-04	18	338	2018	12	4	4	23.7375	70.2083	1.33333	18.6417	Tuesday	0	0.7625	48.8333	41.0833	2
2018-12-05	24	339	2018	12	5	4	23.8375	58.3111	1.95833	19.3833	Wednesday	0	0.6625	39.2917	47.125	1
2018-12-05	24	339	2018	12	5	4	23.8375	58.3111	1.95833	19.3833	Wednesday	0	0.6625	39.2917	47.125	2
2018-12-06	24	340	2018	12	6	4	21.9083	77.1702	2.60417	16.7792	Thursday	0	0.663636	54.2174	38.75	1
2018-12-06	24	340	2018	12	6	4	21.9083	77.1702	2.60417	16.7792	Thursday	0	0.663636	54.2174	38.75	2
2018-12-07	10	341	2018	12	7	4	13.8625	32.7708	5.14583	9.29167	Friday	0	1.0625	6.375	19.0833	1
2018-12-07	10	341	2018	12	7	4	13.8625	32.7708	5.14583	9.29167	Friday	0	1.0625	6.375	19.0833	2
2018-12-08	13	342	2018	12	8	4	11.5	74.9583	5.25	7.68333	Saturday	0	0.929167	10.0833	9.95833	1
2018-12-08	13	342	2018	12	8	4	11.5	74.9583	5.25	7.68333	Saturday	0	0.929167	10.0833	9.95833	2
2018-12-09	12	343	2018	12	9	4	9.51667	82.4043	3.70833	7.15417	Sunday	0	0.843478	7.3913	8.34783	1
2018-12-09	12	343	2018	12	9	4	9.51667	82.4043	3.70833	7.15417	Sunday	0	0.843478	7.3913	8.34783	2
2018-12-10	18	344	2018	12	10	4	12.7458	79.1667	3.64583	7.79583	Monday	0	0.854167	10.1667	20.2917	1
2018-12-10	18	344	2018	12	10	4	12.7458	79.1667	3.64583	7.79583	Monday	0	0.854167	10.1667	20.2917	2
2018-12-11	17	345	2018	12	11	4	11.15	69.1818	5.64583	5.91667	Tuesday	0	0.991667	9.95833	19.0417	1
2018-12-11	17	345	2018	12	11	4	11.15	69.1818	5.64583	5.91667	Tuesday	0	0.991667	9.95833	19.0417	2
2018-12-12	16	346	2018	12	12	4	9.3125	67.5455	4.75	4.775	Wednesday	0	0.82381	14.7619	16.9524	1
2018-12-12	16	346	2018	12	12	4	9.3125	67.5455	4.75	4.775	Wednesday	0	0.82381	14.7619	16.9524	2
2018-12-13	18	347	2018	12	13	4	11.4458	76.3958	4.58333	5.5375	Thursday	0	0.83913	19.2609	28	1
2018-12-13	18	347	2018	12	13	4	11.4458	76.3958	4.58333	5.5375	Thursday	0	0.83913	19.2609	28	2
2018-12-14	12	348	2018	12	14	4	13.5917	41.5208	3.97917	7.925	Friday	0	0.718182	24.4167	23.7083	1
2018-12-14	12	348	2018	12	14	4	13.5917	41.5208	3.97917	7.925	Friday	0	0.718182	24.4167	23.7083	2
2018-12-15	22	349	2018	12	15	4	16.2458	68.9583	2.66667	10.5375	Saturday	0	0.9625	25.0417	36.75	1
2018-12-15	22	349	2018	12	15	4	16.2458	68.9583	2.66667	10.5375	Saturday	0	0.9625	25.0417	36.75	2
2018-12-16	23	350	2018	12	16	4	14.7083	90.625	4.52083	8.325	Sunday	0	1.225	20.2917	37.875	1
2018-12-16	23	350	2018	12	16	4	14.7083	90.625	4.52083	8.325	Sunday	0	1.225	20.2917	37.875	2
2018-12-17	21	351	2018	12	17	4	13.9958	89.25	3.85417	3.64583	Monday	0	1.02222	46.2778	22.7222	1
2018-12-17	21	351	2018	12	17	4	13.9958	89.25	3.85417	3.64583	Monday	0	1.02222	46.2778	22.7222	2
2018-12-18	26	352	2018	12	18	4	15.7583	76.7292	1.33333	6.4375	Tuesday	0	1.27083	45.125	47.7917	1
2018-12-18	26	352	2018	12	18	4	15.7583	76.7292	1.33333	6.4375	Tuesday	0	1.27083	45.125	47.7917	2
2018-12-19	24	353	2018	12	19	4	19.4875	63.6667	1.39583	14.2917	Wednesday	0	1.55833	31.5833	56.7917	1
2018-12-19	24	353	2018	12	19	4	19.4875	63.6667	1.39583	14.2917	Wednesday	0	1.55833	31.5833	56.7917	2
2018-12-20	14	354	2018	12	20	4	21.8333	72.5833	1.02083	18.3	Thursday	0	1.31667	40.4444	43.25	1
2018-12-20	14	354	2018	12	20	4	21.8333	72.5833	1.02083	18.3	Thursday	0	1.31667	40.4444	43.25	2
2018-12-21	21	355	2018	12	21	4	22.575	42.625	1.66667	17.7708	Friday	0	0.9	39.1875	33.5625	1
2018-12-21	21	355	2018	12	21	4	22.575	42.625	1.66667	17.7708	Friday	0	0.9	39.1875	33.5625	2
2018-12-22	22	356	2018	12	22	4	22.725	68.9792	1.89583	16.8542	Saturday	0	0.8	41	62	1
2018-12-22	22	356	2018	12	22	4	22.725	68.9792	1.89583	16.8542	Saturday	0	0.8	41	62	2
2018-12-23	22	357	2018	12	23	4	18.0958	88.5208	5.45833	11.8917	Sunday	0	1.2	17	105	1
2018-12-23	22	357	2018	12	23	4	18.0958	88.5208	5.45833	11.8917	Sunday	0	1.2	17	105	2
2018-12-24	28	358	2018	12	24	4	15.15	86.8958	3.77083	12.1	Monday	0	0.9	88	111	1
2018-12-24	28	358	2018	12	24	4	15.15	86.8958	3.77083	12.1	Monday	0	0.9	88	111	2
2018-12-25	21	359	2018	12	25	4	17.625	79.1875	1.58333	14.6958	Tuesday	0	0.6	119	80	1
2018-12-25	21	359	2018	12	25	4	17.625	79.1875	1.58333	14.6958	Tuesday	0	0.6	119	80	2
2018-12-26	23	360	2018	12	26	4	19.9708	60.4043	2.64583	14.7417	Wednesday	0	1.5	41	82	1
2018-12-26	23	360	2018	12	26	4	19.9708	60.4043	2.64583	14.7417	Wednesday	0	1.5	41	82	2
2018-12-27	20	361	2018	12	27	4	16.675	80.4889	4.77083	9.97083	Thursday	0	0.8	37.1429	23.8571	1
2018-12-27	20	361	2018	12	27	4	16.675	80.4889	4.77083	9.97083	Thursday	0	0.8	37.1429	23.8571	2
2018-12-28	22	362	2018	12	28	4	13.1125	51.4583	5.95833	5.95417	Friday	0	0.468182	25.6522	22.7826	1
2018-12-28	22	362	2018	12	28	4	13.1125	51.4583	5.95833	5.95417	Friday	0	0.468182	25.6522	22.7826	2
2018-12-29	21	363	2018	12	29	4	9.1875	71.5417	6.5625	1.6875	Saturday	0	0.420833	22.375	20.875	1
2018-12-29	21	363	2018	12	29	4	9.1875	71.5417	6.5625	1.6875	Saturday	0	0.420833	22.375	20.875	2
2018-12-30	24	364	2018	12	30	4	7.20417	87.5833	5.65957	1.93333	Sunday	0	0.466667	24.5833	40.8696	1
2018-12-30	24	364	2018	12	30	4	7.20417	87.5833	5.65957	1.93333	Sunday	0	0.466667	24.5833	40.8696	2
2018-12-31	20	365	2018	12	31	4	7.15417	83.8542	4.66667	3.34583	Monday	0	0.483333	16.8333	31.2917	1
2018-12-31	20	365	2018	12	31	4	7.15417	83.8542	4.66667	3.34583	Monday	0	0.483333	16.8333	31.2917	2
2019-01-01	20	366	2019	1	1	4	9.11667	87.75	4.97917	4.22083	Tuesday	1	0.4875	25	30.9583	1
2019-01-01	20	366	2019	1	1	4	9.11667	87.75	4.97917	4.22083	Tuesday	1	0.4875	25	30.9583	2
2019-01-02	22	367	2019	1	2	4	8.92083	49.2174	4.33333	5.88333	Wednesday	1	0.6625	9.95833	25.75	1
2019-01-02	22	367	2019	1	2	4	8.92083	49.2174	4.33333	5.88333	Wednesday	1	0.6625	9.95833	25.75	2
2019-01-03	20	368	2019	1	3	4	13.4083	72.9792	2.72917	8.84167	Thursday	1	0.626087	10	28.4583	1
2019-01-03	20	368	2019	1	3	4	13.4083	72.9792	2.72917	8.84167	Thursday	1	0.626087	10	28.4583	2
2019-01-04	28	369	2019	1	4	4	14.85	57.4375	1.41667	12.9167	Friday	0	1.19167	4.5	62.375	1
2019-01-04	28	369	2019	1	4	4	14.85	57.4375	1.41667	12.9167	Friday	0	1.19167	4.5	62.375	2
2019-01-05	25	370	2019	1	5	4	13.8	67.4167	3.35417	11.025	Saturday	0	1.25	4.375	48.9583	1
2019-01-05	25	370	2019	1	5	4	13.8	67.4167	3.35417	11.025	Saturday	0	1.25	4.375	48.9583	2
2019-01-06	23	371	2019	1	6	4	13.2792	86.125	2.89583	10.2708	Sunday	0	0.983333	7.70833	18.7083	1
2019-01-06	23	371	2019	1	6	4	13.2792	86.125	2.89583	10.2708	Sunday	0	0.983333	7.70833	18.7083	2
2019-01-07	17	372	2019	1	7	4	15.2208	72.8333	1.70833	12.1792	Monday	0	1.30833	4.875	64.5833	1
2019-01-07	17	372	2019	1	7	4	15.2208	72.8333	1.70833	12.1792	Monday	0	1.30833	4.875	64.5833	2
2019-01-08	24	373	2019	1	8	4	13.3875	76.4375	4.3125	9.225	Tuesday	0	1.17083	7.04167	28.5	1
2019-01-08	24	373	2019	1	8	4	13.3875	76.4375	4.3125	9.225	Tuesday	0	1.17083	7.04167	28.5	2
2019-01-09	24	374	2019	1	9	4	14.8125	46.1957	2.95833	10.2208	Wednesday	0	1.175	15.0833	37.875	1
2019-01-09	24	374	2019	1	9	4	14.8125	46.1957	2.95833	10.2208	Wednesday	0	1.175	15.0833	37.875	2
2019-01-10	15	375	2019	1	10	4	17.0083	69.383	1.78723	12.9333	Thursday	0	1.48261	8.30435	73.625	1
2019-01-10	15	375	2019	1	10	4	17.0083	69.383	1.78723	12.9333	Thursday	0	1.48261	8.30435	73.625	2
2019-01-11	29	376	2019	1	11	4	18.1125	34.8333	2.0625	14.3625	Friday	0	1.75	13.6364	105.875	1
2019-01-11	29	376	2019	1	11	4	18.1125	34.8333	2.0625	14.3625	Friday	0	1.75	13.6364	105.875	2
2019-01-12	21	377	2019	1	12	4	17.2458	74.4167	2.35417	13.2583	Saturday	0	1.5375	9.04167	62.9583	1
2019-01-12	21	377	2019	1	12	4	17.2458	74.4167	2.35417	13.2583	Saturday	0	1.5375	9.04167	62.9583	2
2019-01-13	23	378	2019	1	13	4	18.1542	75.6458	1.52083	13.8667	Sunday	0	1.48333	13.4583	71.1667	1
2019-01-13	23	378	2019	1	13	4	18.1542	75.6458	1.52083	13.8667	Sunday	0	1.48333	13.4583	71.1667	2
2019-01-14	25	379	2019	1	14	4	18.7625	80.7021	1.875	14.0333	Monday	0	1.5375	18.5417	83.9583	1
2019-01-14	25	379	2019	1	14	4	18.7625	80.7021	1.875	14.0333	Monday	0	1.5375	18.5417	83.9583	2
2019-01-15	29	380	2019	1	15	4	16.0458	85.6667	4.35417	10.1833	Tuesday	0	1.4125	15.5	70.9167	1
2019-01-15	29	380	2019	1	15	4	16.0458	85.6667	4.35417	10.1833	Tuesday	0	1.4125	15.5	70.9167	2
2019-01-16	16	381	2019	1	16	4	12.8833	45.4348	4.625	6.15417	Wednesday	0	1.1125	24.25	23.75	1
2019-01-16	16	381	2019	1	16	4	12.8833	45.4348	4.625	6.15417	Wednesday	0	1.1125	24.25	23.75	2
2019-01-17	19	382	2019	1	17	4	13.5167	63.5625	4.25	5.9125	Thursday	0	1.14783	54.1304	31.3478	1
2019-01-17	19	382	2019	1	17	4	13.5167	63.5625	4.25	5.9125	Thursday	0	1.14783	54.1304	31.3478	2
2019-01-18	22	383	2019	1	18	4	15.1958	38.1458	2.02083	8.82083	Friday	0	1.09524	27.4286	42.381	1
2019-01-18	22	383	2019	1	18	4	15.1958	38.1458	2.02083	8.82083	Friday	0	1.09524	27.4286	42.381	2
2019-01-19	18	384	2019	1	19	4	18.7583	72.8542	1.41667	12.8208	Saturday	0	1.29583	55.0417	86.125	1
2019-01-19	18	384	2019	1	19	4	18.7583	72.8542	1.41667	12.8208	Saturday	0	1.29583	55.0417	86.125	2
2019-01-20	20	385	2019	1	20	4	16.7292	73.6458	4	9.82083	Sunday	0	1.04167	31.5417	61.9167	1
2019-01-20	20	385	2019	1	20	4	16.7292	73.6458	4	9.82083	Sunday	0	1.04167	31.5417	61.9167	2
2019-01-21	30	386	2019	1	21	4	13.3333	80.8125	5.66667	4.48333	Monday	0	0.825	61.375	32.1667	1
2019-01-21	30	386	2019	1	21	4	13.3333	80.8125	5.66667	4.48333	Monday	0	0.825	61.375	32.1667	2
2019-01-22	13	387	2019	1	22	4	12.8333	82.4167	4.16667	2.06667	Tuesday	0	0.895833	71.875	71.9583	1
2019-01-22	13	387	2019	1	22	4	12.8333	82.4167	4.16667	2.06667	Tuesday	0	0.895833	71.875	71.9583	2
2019-01-23	27	388	2019	1	23	4	14.4333	48.6667	1.64583	2.6625	Wednesday	0	0.877273	51.8636	62.9091	1
2019-01-23	27	388	2019	1	23	4	14.4333	48.6667	1.64583	2.6625	Wednesday	0	0.877273	51.8636	62.9091	2
2019-01-24	19	389	2019	1	24	4	15.7542	61.5417	1.41667	6.7375	Thursday	0	1.03043	59.6522	88	1
2019-01-24	19	389	2019	1	24	4	15.7542	61.5417	1.41667	6.7375	Thursday	0	1.03043	59.6522	88	2
2019-01-25	27	390	2019	1	25	4	18.8667	46.6458	1.79167	8.48333	Friday	0	0.970588	55.1176	95.9412	1
2019-01-25	27	390	2019	1	25	4	18.8667	46.6458	1.79167	8.48333	Friday	0	0.970588	55.1176	95.9412	2
2019-01-26	22	391	2019	1	26	4	16.4708	77.5833	4.5625	4.52083	Saturday	0	0.708333	74.0833	43.8333	1
2019-01-26	22	391	2019	1	26	4	16.4708	77.5833	4.5625	4.52083	Saturday	0	0.708333	74.0833	43.8333	2
2019-01-27	16	392	2019	1	27	4	16.0417	70.2083	1.5	7.425	Sunday	0	0.77619	77.5238	66.6667	1
2019-01-27	16	392	2019	1	27	4	16.0417	70.2083	1.5	7.425	Sunday	0	0.77619	77.5238	66.6667	2
2019-01-28	24	393	2019	1	28	4	16.9583	74.0208	1.60417	9.80417	Monday	0	0.6875	86.875	55.125	1
2019-01-28	24	393	2019	1	28	4	16.9583	74.0208	1.60417	9.80417	Monday	0	0.6875	86.875	55.125	2
2019-01-29	25	394	2019	1	29	4	18.375	60.5625	1.58696	10.3833	Tuesday	0	0.758333	62.875	56.2917	1
2019-01-29	25	394	2019	1	29	4	18.375	60.5625	1.58696	10.3833	Tuesday	0	0.758333	62.875	56.2917	2
2019-01-30	19	395	2019	1	30	4	20.1958	58.2917	2.0625	13.2333	Wednesday	0	0.556522	64.6957	33	1
2019-01-30	19	395	2019	1	30	4	20.1958	58.2917	2.0625	13.2333	Wednesday	0	0.556522	64.6957	33	2
2019-01-31	22	396	2019	1	31	4	19.1958	62.3333	3.5	11.125	Thursday	0	0.670588	45.6471	21.4118	1
2019-01-31	22	396	2019	1	31	4	19.1958	62.3333	3.5	11.125	Thursday	0	0.670588	45.6471	21.4118	2
2019-02-01	19	397	2019	2	1	4	15.0708	49.0208	3.83333	7.29167	Friday	0	0.891667	63.5	19.4167	1
2019-02-01	19	397	2019	2	1	4	15.0708	49.0208	3.83333	7.29167	Friday	0	0.891667	63.5	19.4167	2
2019-02-02	19	398	2019	2	2	4	19.3542	67.4792	1.5	13.9917	Saturday	0	0.652174	65.7826	26.9565	1
2019-02-02	19	398	2019	2	2	4	19.3542	67.4792	1.5	13.9917	Saturday	0	0.652174	65.7826	26.9565	2
2019-02-03	10	399	2019	2	3	4	21.0708	77.9375	1.22917	16.9083	Sunday	0	0.413043	75.3913	25.4348	1
2019-02-03	10	399	2019	2	3	4	21.0708	77.9375	1.22917	16.9083	Sunday	0	0.413043	75.3913	25.4348	2
2019-02-04	13	400	2019	2	4	4	22.2917	67.8125	1.52083	16.55	Monday	1	0.521739	65.5217	31.5217	1
2019-02-04	13	400	2019	2	4	4	22.2917	67.8125	1.52083	16.55	Monday	1	0.521739	65.5217	31.5217	2
2019-02-05	9	401	2019	2	5	4	22.1208	67.3542	2.79167	17.5292	Tuesday	1	0.570833	76.6667	32.2083	1
2019-02-05	9	401	2019	2	5	4	22.1208	67.3542	2.79167	17.5292	Tuesday	1	0.570833	76.6667	32.2083	2
2019-02-06	10	402	2019	2	6	4	23.4833	58.8125	3.91667	17.8958	Wednesday	1	0.452174	67.1304	28.8696	1
2019-02-06	10	402	2019	2	6	4	23.4833	58.8125	3.91667	17.8958	Wednesday	1	0.452174	67.1304	28.8696	2
2019-02-07	15	403	2019	2	7	4	23.1167	60.8958	2.79167	18.4542	Thursday	1	0.345833	55.5	18.6667	1
2019-02-07	15	403	2019	2	7	4	23.1167	60.8958	2.79167	18.4542	Thursday	1	0.345833	55.5	18.6667	2
2019-02-08	8	404	2019	2	8	4	23.0125	71.2128	3.3125	17.8208	Friday	1	0.352174	59	17.6957	1
2019-02-08	8	404	2019	2	8	4	23.0125	71.2128	3.3125	17.8208	Friday	1	0.352174	59	17.6957	2
2019-02-09	16	405	2019	2	9	4	16.4875	69.3958	2.85417	14.0125	Saturday	1	0.404167	48.8333	21.5	1
2019-02-09	16	405	2019	2	9	4	16.4875	69.3958	2.85417	14.0125	Saturday	1	0.404167	48.8333	21.5	2
2019-02-10	18	406	2019	2	10	4	12.6125	88.6667	2.72917	10.8125	Sunday	1	0.704167	6.58333	17.75	1
2019-02-10	18	406	2019	2	10	4	12.6125	88.6667	2.72917	10.8125	Sunday	1	0.704167	6.58333	17.75	2
2019-02-11	7	407	2019	2	11	4	12.1625	64.9792	3.66667	8.17917	Monday	0	0.475	13.625	7.29167	1
2019-02-11	7	407	2019	2	11	4	12.1625	64.9792	3.66667	8.17917	Monday	0	0.475	13.625	7.29167	2
2019-02-12	20	408	2019	2	12	4	19.2292	71.0833	1.72917	13.6958	Tuesday	0	0.491304	32.5652	20.2609	1
2019-02-12	20	408	2019	2	12	4	19.2292	71.0833	1.72917	13.6958	Tuesday	0	0.491304	32.5652	20.2609	2
2019-02-13	13	409	2019	2	13	4	20.3083	55.8125	1.1875	16.0042	Wednesday	0	0.575	41.75	28.8333	1
2019-02-13	13	409	2019	2	13	4	20.3083	55.8125	1.1875	16.0042	Wednesday	0	0.575	41.75	28.8333	2
2019-02-14	12	410	2019	2	14	4	21.0917	62.1458	1.625	16.4292	Thursday	0	0.390909	45.6364	16.1739	1
2019-02-14	12	410	2019	2	14	4	21.0917	62.1458	1.625	16.4292	Thursday	0	0.390909	45.6364	16.1739	2
2019-02-15	11	411	2019	2	15	4	20.4167	78.8958	1.97917	17.3333	Friday	0	0.391667	49.2083	13.625	1
2019-02-15	11	411	2019	2	15	4	20.4167	78.8958	1.97917	17.3333	Friday	0	0.391667	49.2083	13.625	2
2019-02-16	22	412	2019	2	16	4	19.9583	65.2292	2.3125	14.8917	Saturday	0	0.430435	48.2609	15.6087	1
2019-02-16	22	412	2019	2	16	4	19.9583	65.2292	2.3125	14.8917	Saturday	0	0.430435	48.2609	15.6087	2
2019-02-17	17	413	2019	2	17	4	15.1333	81.9792	2.79167	11.4292	Sunday	0	0.945833	13.2917	35.25	1
2019-02-17	17	413	2019	2	17	4	15.1333	81.9792	2.79167	11.4292	Sunday	0	0.945833	13.2917	35.25	2
2019-02-18	23	414	2019	2	18	4	15.4083	64.2708	2.875	14.2708	Monday	0	0.695833	15.4583	16.6667	1
2019-02-18	23	414	2019	2	18	4	15.4083	64.2708	2.875	14.2708	Monday	0	0.695833	15.4583	16.6667	2
2019-02-19	14	415	2019	2	19	4	19.4708	73.625	1.54167	16.5625	Tuesday	0	0.825	21.4167	23.3333	1
2019-02-19	14	415	2019	2	19	4	19.4708	73.625	1.54167	16.5625	Tuesday	0	0.825	21.4167	23.3333	2
2019-02-20	31	416	2019	2	20	4	24.0625	52.8958	2.93617	20.3917	Wednesday	0	1.44286	4	34.5714	1
2019-02-20	31	416	2019	2	20	4	24.0625	52.8958	2.93617	20.3917	Wednesday	0	1.44286	4	34.5714	2
2019-02-21	13	417	2019	2	21	4	16.8042	68.9762	3.85417	14.2625	Thursday	0	0.3625	25.7692	16.3077	1
2019-02-21	13	417	2019	2	21	4	16.8042	68.9762	3.85417	14.2625	Thursday	0	0.3625	25.7692	16.3077	2
2019-02-22	28	418	2019	2	22	4	14.9042	63.7917	5.10417	9.30833	Friday	0	0.986364	28.2609	15.5217	1
2019-02-22	28	418	2019	2	22	4	14.9042	63.7917	5.10417	9.30833	Friday	0	0.986364	28.2609	15.5217	2
2019-02-23	28	419	2019	2	23	4	10.4458	58.5417	3.5	8.675	Saturday	0	0.916667	14.4167	12	1
2019-02-23	28	419	2019	2	23	4	10.4458	58.5417	3.5	8.675	Saturday	0	0.916667	14.4167	12	2
2019-02-24	17	420	2019	2	24	4	13.3	78.3125	3.04167	8.975	Sunday	0	0.891667	29.2083	7.125	1
2019-02-24	17	420	2019	2	24	4	13.3	78.3125	3.04167	8.975	Sunday	0	0.891667	29.2083	7.125	2
2019-02-25	23	421	2019	2	25	4	12.275	72.625	2.58333	9.75	Monday	0	0.9375	11.7917	18.75	1
2019-02-25	23	421	2019	2	25	4	12.275	72.625	2.58333	9.75	Monday	0	0.9375	11.7917	18.75	2
2019-02-26	20	422	2019	2	26	4	15.7083	74.1667	1.64583	13.175	Tuesday	0	1.12083	7.16667	28.375	1
2019-02-26	20	422	2019	2	26	4	15.7083	74.1667	1.64583	13.175	Tuesday	0	1.12083	7.16667	28.375	2
2019-02-27	30	423	2019	2	27	4	19.9625	52.5745	1.20833	16.9458	Wednesday	0	1.22174	30.087	46.087	1
2019-02-27	30	423	2019	2	27	4	19.9625	52.5745	1.20833	16.9458	Wednesday	0	1.22174	30.087	46.087	2
2019-02-28	22	424	2019	2	28	4	17.8083	67.4894	2.41667	14.075	Thursday	0	1.44167	16	54.9583	1
2019-02-28	22	424	2019	2	28	4	17.8083	67.4894	2.41667	14.075	Thursday	0	1.44167	16	54.9583	2
2019-03-01	16	425	2019	3	1	1	21.2958	65.2083	1.66667	17.2208	Friday	0	1.03333	27.4167	34.125	1
2019-03-01	16	425	2019	3	1	1	21.2958	65.2083	1.66667	17.2208	Friday	0	1.03333	27.4167	34.125	2
2019-03-02	22	426	2019	3	2	1	21.1042	51	1.77083	18.8	Saturday	0	0.6	29.15	23.75	1
2019-03-02	22	426	2019	3	2	1	21.1042	51	1.77083	18.8	Saturday	0	0.6	29.15	23.75	2
2019-03-03	23	427	2019	3	3	1	18.5875	81.9574	2.625	13.9792	Sunday	0	0.7375	45.6667	19.7917	1
2019-03-03	23	427	2019	3	3	1	18.5875	81.9574	2.625	13.9792	Sunday	0	0.7375	45.6667	19.7917	2
2019-03-04	17	428	2019	3	4	1	20.2375	79.5208	2.25	16.0125	Monday	0	0.784211	49.4737	24.7368	1
2019-03-04	17	428	2019	3	4	1	20.2375	79.5208	2.25	16.0125	Monday	0	0.784211	49.4737	24.7368	2
2019-03-05	24	429	2019	3	5	1	20.2875	79.1042	2.5625	18.5542	Tuesday	0	0.629167	39	10.9583	1
2019-03-05	24	429	2019	3	5	1	20.2875	79.1042	2.5625	18.5542	Tuesday	0	0.629167	39	10.9583	2
2019-03-06	22	430	2019	3	6	1	16.6625	51.2128	3.14583	14.4208	Wednesday	0	0.704545	15.3182	12.4545	1
2019-03-06	22	430	2019	3	6	1	16.6625	51.2128	3.14583	14.4208	Wednesday	0	0.704545	15.3182	12.4545	2
2019-03-07	19	431	2019	3	7	1	13.7333	63.2708	3.5625	12.1	Thursday	0	0.763636	10.2727	13.0833	1
2019-03-07	19	431	2019	3	7	1	13.7333	63.2708	3.5625	12.1	Thursday	0	0.763636	10.2727	13.0833	2
2019-03-08	34	432	2019	3	8	1	14.0917	63.125	1.89583	12.5542	Friday	0	0.881818	7.54545	20.5455	1
2019-03-08	34	432	2019	3	8	1	14.0917	63.125	1.89583	12.5542	Friday	0	0.881818	7.54545	20.5455	2
2019-03-09	26	433	2019	3	9	1	14.4417	48.375	2.4375	12.8125	Saturday	0	1.01	4.7	13.3	1
2019-03-09	26	433	2019	3	9	1	14.4417	48.375	2.4375	12.8125	Saturday	0	1.01	4.7	13.3	2
2019-03-10	26	434	2019	3	10	1	15.1304	68.0417	3.875	12.1565	Sunday	0	0.95	15.625	17.375	1
2019-03-10	26	434	2019	3	10	1	15.1304	68.0417	3.875	12.1565	Sunday	0	0.95	15.625	17.375	2
2019-03-11	23	435	2019	3	11	1	18.1292	74.8958	2.25	11.5667	Monday	0	0.895833	53.3333	34.8333	1
2019-03-11	23	435	2019	3	11	1	18.1292	74.8958	2.25	11.5667	Monday	0	0.895833	53.3333	34.8333	2
2019-03-12	27	436	2019	3	12	1	20.0042	80.0208	1.5	11.75	Tuesday	0	1.02917	79.9583	56.5833	1
2019-03-12	27	436	2019	3	12	1	20.0042	80.0208	1.5	11.75	Tuesday	0	1.02917	79.9583	56.5833	2
2019-03-13	22	437	2019	3	13	1	21.4421	54.9792	1.6875	13.8105	Wednesday	0	0.808333	61.0417	46.9167	1
2019-03-13	22	437	2019	3	13	1	21.4421	54.9792	1.6875	13.8105	Wednesday	0	0.808333	61.0417	46.9167	2
2019-03-14	24	438	2019	3	14	1	18.3667	61.1875	2.72917	15.3417	Thursday	0	0.709091	28.4545	27.2083	1
2019-03-14	24	438	2019	3	14	1	18.3667	61.1875	2.72917	15.3417	Thursday	0	0.709091	28.4545	27.2083	2
2019-03-15	21	439	2019	3	15	1	17.5167	63.383	3.35417	12.0375	Friday	0	0.582609	50.0435	31.087	1
2019-03-15	21	439	2019	3	15	1	17.5167	63.383	3.35417	12.0375	Friday	0	0.582609	50.0435	31.087	2
2019-03-16	17	440	2019	3	16	1	20.1238	41.3542	1.47917	12.8619	Saturday	0	0.758333	58.0417	46.7917	1
2019-03-16	17	440	2019	3	16	1	20.1238	41.3542	1.47917	12.8619	Saturday	0	0.758333	58.0417	46.7917	2
2019-03-17	33	441	2019	3	17	1	20.9542	78.1042	1.85417	14.45	Sunday	0	0.558333	70.8333	29.75	1
2019-03-17	33	441	2019	3	17	1	20.9542	78.1042	1.85417	14.45	Sunday	0	0.558333	70.8333	29.75	2
2019-03-18	21	442	2019	3	18	1	19.975	71.4792	1.54167	16.25	Monday	0	0.8125	53.0417	46.8333	1
2019-03-18	21	442	2019	3	18	1	19.975	71.4792	1.54167	16.25	Monday	0	0.8125	53.0417	46.8333	2
2019-03-19	22	443	2019	3	19	1	23.7458	77.3125	2.14583	18.8	Tuesday	0	0.966667	29.0417	44.75	1
2019-03-19	22	443	2019	3	19	1	23.7458	77.3125	2.14583	18.8	Tuesday	0	0.966667	29.0417	44.75	2
2019-03-20	27	444	2019	3	20	1	23.7333	56.3913	3.0625	20.5375	Wednesday	0	0.5375	37.25	24.2917	1
2019-03-20	27	444	2019	3	20	1	23.7333	56.3913	3.0625	20.5375	Wednesday	0	0.5375	37.25	24.2917	2
2019-03-21	27	445	2019	3	21	1	25.4875	61.1667	3.16667	20.8958	Thursday	0	0.482353	27.2353	19.4706	1
2019-03-21	27	445	2019	3	21	1	25.4875	61.1667	3.16667	20.8958	Thursday	0	0.482353	27.2353	19.4706	2
2019-03-22	24	446	2019	3	22	1	22.2083	59.25	2.75	18.4292	Friday	0	0.561905	18.8182	25.3043	1
2019-03-22	24	446	2019	3	22	1	22.2083	59.25	2.75	18.4292	Friday	0	0.561905	18.8182	25.3043	2
2019-03-23	8	447	2019	3	23	1	14.0125	43.3958	4.85106	11.5292	Saturday	0	0.679167	18.125	23.9583	1
2019-03-23	8	447	2019	3	23	1	14.0125	43.3958	4.85106	11.5292	Saturday	0	0.679167	18.125	23.9583	2
2019-03-24	28	448	2019	3	24	1	14.0333	70.7292	2.41667	12.2167	Sunday	0	0.641667	13.8333	14.1667	1
2019-03-24	28	448	2019	3	24	1	14.0333	70.7292	2.41667	12.2167	Sunday	0	0.641667	13.8333	14.1667	2
2019-03-25	21	449	2019	3	25	1	19.9125	74	2.23913	15.9792	Monday	0	0.908333	9.04167	22.625	1
2019-03-25	21	449	2019	3	25	1	19.9125	74	2.23913	15.9792	Monday	0	0.908333	9.04167	22.625	2
2019-03-26	30	450	2019	3	26	1	22.0208	75.0625	1.29167	18.1958	Tuesday	0	1.24167	21.5417	46.625	1
2019-03-26	30	450	2019	3	26	1	22.0208	75.0625	1.29167	18.1958	Tuesday	0	1.24167	21.5417	46.625	2
2019-03-27	22	451	2019	3	27	1	23.3875	56.2917	2.5	19.2542	Wednesday	0	0.6625	40.2917	25.7917	1
2019-03-27	22	451	2019	3	27	1	23.3875	56.2917	2.5	19.2542	Wednesday	0	0.6625	40.2917	25.7917	2
2019-03-28	22	452	2019	3	28	1	24.8917	61.2292	2.125	20.625	Thursday	0	0.663636	42.3636	28.8636	1
2019-03-28	22	452	2019	3	28	1	24.8917	61.2292	2.125	20.625	Thursday	0	0.663636	42.3636	28.8636	2
2019-03-29	13	453	2019	3	29	1	21.8125	58.0208	2.10417	19.575	Friday	0	0.7375	15.6667	27.9167	1
2019-03-29	13	453	2019	3	29	1	21.8125	58.0208	2.10417	19.575	Friday	0	0.7375	15.6667	27.9167	2
2019-03-30	19	454	2019	3	30	1	24.5875	40.0208	1.9375	19.2583	Saturday	0	0.666667	54.9167	31.0417	1
2019-03-30	19	454	2019	3	30	1	24.5875	40.0208	1.9375	19.2583	Saturday	0	0.666667	54.9167	31.0417	2
2019-03-31	23	455	2019	3	31	1	21.7	82.4255	2.04167	18.1625	Sunday	0	0.479167	62.625	23.8333	1
2019-03-31	23	455	2019	3	31	1	21.7	82.4255	2.04167	18.1625	Sunday	0	0.479167	62.625	23.8333	2
2019-04-01	31	456	2019	4	1	1	17.4125	79.1458	2.97917	14.95	Monday	0	0.666667	27.2083	24.9583	1
2019-04-01	31	456	2019	4	1	1	17.4125	79.1458	2.97917	14.95	Monday	0	0.666667	27.2083	24.9583	2
2019-04-02	23	457	2019	4	2	1	21.725	72.9583	1.79167	17.3542	Tuesday	0	0.575	50.4583	24	1
2019-04-02	23	457	2019	4	2	1	21.725	72.9583	1.79167	17.3542	Tuesday	0	0.575	50.4583	24	2
2019-04-03	16	458	2019	4	3	1	22.8958	42.6667	2	18.8833	Wednesday	0	0.583333	72.375	31.3333	1
2019-04-03	16	458	2019	4	3	1	22.8958	42.6667	2	18.8833	Wednesday	0	0.583333	72.375	31.3333	2
2019-04-04	21	459	2019	4	4	1	19.8	68.7292	2.5	17.8458	Thursday	0	0.4875	53.0417	22.3333	1
2019-04-04	21	459	2019	4	4	1	19.8	68.7292	2.5	17.8458	Thursday	0	0.4875	53.0417	22.3333	2
2019-04-05	25	460	2019	4	5	1	22.4917	43.5208	2	18.0667	Friday	1	0.854167	56.0417	35.7083	1
2019-04-05	25	460	2019	4	5	1	22.4917	43.5208	2	18.0667	Friday	1	0.854167	56.0417	35.7083	2
2019-04-06	24	461	2019	4	6	1	25.6	39.125	1.8125	20.2708	Saturday	1	0.745833	57.8333	34.375	1
2019-04-06	24	461	2019	4	6	1	25.6	39.125	1.8125	20.2708	Saturday	1	0.745833	57.8333	34.375	2
2019-04-07	23	462	2019	4	7	1	26.325	89.375	2.14583	21.7375	Sunday	1	0.529167	51.25	21.7083	1
2019-04-07	23	462	2019	4	7	1	26.325	89.375	2.14583	21.7375	Sunday	1	0.529167	51.25	21.7083	2
2019-04-08	13	463	2019	4	8	1	27.0375	73.625	3.10417	22.4958	Monday	0	0.5	28.25	19.5	1
2019-04-08	13	463	2019	4	8	1	27.0375	73.625	3.10417	22.4958	Monday	0	0.5	28.25	19.5	2
2019-04-09	19	464	2019	4	9	1	26.8375	78.625	3.39583	22.3833	Tuesday	0	0.408333	25.9091	15.0417	1
2019-04-09	19	464	2019	4	9	1	26.8375	78.625	3.39583	22.3833	Tuesday	0	0.408333	25.9091	15.0417	2
2019-04-10	26	465	2019	4	10	1	28.0125	25.8298	2.3617	22.6167	Wednesday	0	0.470833	48.375	22.875	1
2019-04-10	26	465	2019	4	10	1	28.0125	25.8298	2.3617	22.6167	Wednesday	0	0.470833	48.375	22.875	2
2019-04-11	21	466	2019	4	11	1	22.0833	78.1042	3.375	18.7917	Thursday	0	0.514286	24.9524	21.7273	1
2019-04-11	21	466	2019	4	11	1	22.0833	78.1042	3.375	18.7917	Thursday	0	0.514286	24.9524	21.7273	2
2019-04-12	30	467	2019	4	12	1	18.3667	58.4792	2.95833	16.9583	Friday	0	0.7	13.4583	17.125	1
2019-04-12	30	467	2019	4	12	1	18.3667	58.4792	2.95833	16.9583	Friday	0	0.7	13.4583	17.125	2
2019-04-13	16	468	2019	4	13	1	21.0625	37.2083	2.1875	19.4417	Saturday	0	0.818182	14.1364	28.3182	1
2019-04-13	16	468	2019	4	13	1	21.0625	37.2083	2.1875	19.4417	Saturday	0	0.818182	14.1364	28.3182	2
2019-04-14	25	469	2019	4	14	1	22.475	88.0208	1.8125	20.1042	Sunday	0	0.847826	16.3913	36.3043	1
2019-04-14	25	469	2019	4	14	1	22.475	88.0208	1.8125	20.1042	Sunday	0	0.847826	16.3913	36.3043	2
2019-04-15	17	470	2019	4	15	1	19.4875	76.9792	2.54167	18.275	Monday	0	0.847826	10.7391	18.6522	1
2019-04-15	17	470	2019	4	15	1	19.4875	76.9792	2.54167	18.275	Monday	0	0.847826	10.7391	18.6522	2
2019-04-16	18	471	2019	4	16	1	21.0417	46.6458	2.10417	18.6167	Tuesday	0	0.770833	53.2917	21.2917	1
2019-04-16	18	471	2019	4	16	1	21.0417	46.6458	2.10417	18.6167	Tuesday	0	0.770833	53.2917	21.2917	2
2019-04-17	22	472	2019	4	17	1	24.7208	22.5833	1.45833	19.6917	Wednesday	0	1.10833	72.2917	39.1667	1
2019-04-17	22	472	2019	4	17	1	24.7208	22.5833	1.45833	19.6917	Wednesday	0	1.10833	72.2917	39.1667	2
2019-04-18	29	473	2019	4	18	1	23.3292	79.5319	2.31915	21.1	Thursday	0	0.6	46.8696	16.5652	1
2019-04-18	29	473	2019	4	18	1	23.3292	79.5319	2.31915	21.1	Thursday	0	0.6	46.8696	16.5652	2
2019-04-19	25	474	2019	4	19	1	21.2292	57.2083	2.6875	20.0625	Friday	0	0.534783	48.8261	14.7391	1
2019-04-19	25	474	2019	4	19	1	21.2292	57.2083	2.6875	20.0625	Friday	0	0.534783	48.8261	14.7391	2
2019-04-20	15	475	2019	4	20	1	22.9792	48.7708	1.9375	21.4	Saturday	0	0.682609	21.6957	20.0435	1
2019-04-20	15	475	2019	4	20	1	22.9792	48.7708	1.9375	21.4	Saturday	0	0.682609	21.6957	20.0435	2
2019-04-21	25	476	2019	4	21	1	24.5417	80.875	1.39583	23.0583	Sunday	0	0.708333	27.8333	21.0833	1
2019-04-21	25	476	2019	4	21	1	24.5417	80.875	1.39583	23.0583	Sunday	0	0.708333	27.8333	21.0833	2
2019-04-22	15	477	2019	4	22	1	24.425	80.5208	2.72917	22.3333	Monday	0	0.4875	38.5417	15.5	1
2019-04-22	15	477	2019	4	22	1	24.425	80.5208	2.72917	22.3333	Monday	0	0.4875	38.5417	15.5	2
2019-04-23	24	478	2019	4	23	1	28.0833	52.1458	2.52083	23.4083	Tuesday	0	0.525	42.375	22.6667	1
2019-04-23	24	478	2019	4	23	1	28.0833	52.1458	2.52083	23.4083	Tuesday	0	0.525	42.375	22.6667	2
2019-04-24	29	479	2019	4	24	1	27.8917	17.8723	2.33333	22.9625	Wednesday	0	0.421739	50	18.75	1
2019-04-24	29	479	2019	4	24	1	27.8917	17.8723	2.33333	22.9625	Wednesday	0	0.421739	50	18.75	2
2019-04-25	16	480	2019	4	25	1	28.3417	81.9787	2.35417	23.0625	Thursday	0	0.43913	50.2609	24.9167	1
2019-04-25	16	480	2019	4	25	1	28.3417	81.9787	2.35417	23.0625	Thursday	0	0.43913	50.2609	24.9167	2
2019-04-26	19	481	2019	4	26	1	25.2292	61.8125	2.77083	21.8375	Friday	0	0.441667	41.8333	23.375	1
2019-04-26	19	481	2019	4	26	1	25.2292	61.8125	2.77083	21.8375	Friday	0	0.441667	41.8333	23.375	2
2019-04-27	18	482	2019	4	27	1	21.675	61.5417	2.79167	20.1917	Saturday	0	0.5125	49.0833	13.375	1
2019-04-27	18	482	2019	4	27	1	21.675	61.5417	2.79167	20.1917	Saturday	0	0.5125	49.0833	13.375	2
2019-04-28	19	483	2019	4	28	1	25.0625	88.9792	1.9375	21.625	Sunday	0	0.5625	51.6667	20.75	1
2019-04-28	19	483	2019	4	28	1	25.0625	88.9792	1.9375	21.625	Sunday	0	0.5625	51.6667	20.75	2
2019-04-29	25	484	2019	4	29	1	26.7625	77.0625	2.125	22.9333	Monday	1	0.454545	43.0909	21.0455	1
2019-04-29	25	484	2019	4	29	1	26.7625	77.0625	2.125	22.9333	Monday	1	0.454545	43.0909	21.0455	2
2019-04-30	20	485	2019	4	30	1	23	57.4792	2.85106	19.625	Tuesday	1	0.65	91.125	23.25	1
2019-04-30	20	485	2019	4	30	1	23	57.4792	2.85106	19.625	Tuesday	1	0.65	91.125	23.25	2
2019-05-01	17	486	2019	5	1	1	22.475	18.5	4.1875	16.2792	Wednesday	1	0.708333	54.2917	14.25	1
2019-05-01	17	486	2019	5	1	1	22.475	18.5	4.1875	16.2792	Wednesday	1	0.708333	54.2917	14.25	2
2019-05-02	26	487	2019	5	2	1	19.9958	74.7872	2.3125	17.4292	Thursday	0	0.669565	44.6087	20.7917	1
2019-05-02	26	487	2019	5	2	1	19.9958	74.7872	2.3125	17.4292	Thursday	0	0.669565	44.6087	20.7917	2
2019-05-03	20	488	2019	5	3	1	22.55	60.8542	1.875	17.425	Friday	0	0.595833	67.4583	24.4167	1
2019-05-03	20	488	2019	5	3	1	22.55	60.8542	1.875	17.425	Friday	0	0.595833	67.4583	24.4167	2
2019-05-04	21	489	2019	5	4	1	20.0833	66.25	1.51064	17.7333	Saturday	0	0.570833	68.1667	26.7917	1
2019-05-04	21	489	2019	5	4	1	20.0833	66.25	1.51064	17.7333	Saturday	0	0.570833	68.1667	26.7917	2
2019-05-05	16	490	2019	5	5	1	19.625	74.9792	1.75	18.1542	Sunday	0	0.530435	31.3913	14.2174	1
2019-05-05	16	490	2019	5	5	1	19.625	74.9792	1.75	18.1542	Sunday	0	0.530435	31.3913	14.2174	2
2019-05-06	26	491	2019	5	6	1	20.275	69.3542	1.83333	18.3375	Monday	0	0.5125	25.7917	8.625	1
2019-05-06	26	491	2019	5	6	1	20.275	69.3542	1.83333	18.3375	Monday	0	0.5125	25.7917	8.625	2
2019-05-07	28	492	2019	5	7	1	20.5292	59.4375	2.0625	17.8833	Tuesday	0	0.504348	34.2174	13.4783	1
2019-05-07	28	492	2019	5	7	1	20.5292	59.4375	2.0625	17.8833	Tuesday	0	0.504348	34.2174	13.4783	2
2019-05-08	17	493	2019	5	8	1	19.9917	21.4375	1.72917	18.3458	Wednesday	0	0.566667	13.3333	15.75	1
2019-05-08	17	493	2019	5	8	1	19.9917	21.4375	1.72917	18.3458	Wednesday	0	0.566667	13.3333	15.75	2
2019-05-09	18	494	2019	5	9	1	24.1667	65.5	1.9375	19.5	Thursday	0	0.581818	28.2609	12	1
2019-05-09	18	494	2019	5	9	1	24.1667	65.5	1.9375	19.5	Thursday	0	0.581818	28.2609	12	2
2019-05-10	21	495	2019	5	10	1	25.5417	57.9167	1.66667	20.3625	Friday	0	0.66087	45.6522	22.6522	1
2019-05-10	21	495	2019	5	10	1	25.5417	57.9167	1.66667	20.3625	Friday	0	0.66087	45.6522	22.6522	2
2019-05-11	21	496	2019	5	11	1	27.0583	77.6042	1.58333	21.2875	Saturday	0	0.678261	101.043	32.5652	1
2019-05-11	21	496	2019	5	11	1	27.0583	77.6042	1.58333	21.2875	Saturday	0	0.678261	101.043	32.5652	2
2019-05-12	21	497	2019	5	12	1	27.7958	67.5833	2.0625	20.175	Sunday	0	0.491667	96.5417	21.3333	1
2019-05-12	21	497	2019	5	12	1	27.7958	67.5833	2.0625	20.175	Sunday	0	0.491667	96.5417	21.3333	2
2019-05-13	24	498	2019	5	13	1	28.4	65.3958	2.0625	22.1958	Monday	0	0.486957	60.6087	22.9565	1
2019-05-13	24	498	2019	5	13	1	28.4	65.3958	2.0625	22.1958	Monday	0	0.486957	60.6087	22.9565	2
2019-05-14	15	499	2019	5	14	1	28.5043	64.6042	2.41667	23.2696	Tuesday	0	0.369565	61.7917	18.5417	1
2019-05-14	15	499	2019	5	14	1	28.5043	64.6042	2.41667	23.2696	Tuesday	0	0.369565	61.7917	18.5417	2
2019-05-15	23	500	2019	5	15	1	29.0087	32.1042	2.95833	24.7609	Wednesday	0	0.37619	47.8571	19.4783	1
2019-05-15	23	500	2019	5	15	1	29.0087	32.1042	2.95833	24.7609	Wednesday	0	0.37619	47.8571	19.4783	2
2019-05-16	24	501	2019	5	16	1	30.5208	64.8333	2.89583	24.8	Thursday	0	0.578261	60.4737	20.4167	1
2019-05-16	24	501	2019	5	16	1	30.5208	64.8333	2.89583	24.8	Thursday	0	0.578261	60.4737	20.4167	2
2019-05-17	25	502	2019	5	17	1	29.6875	60.8542	2.60417	25.1	Friday	0	0.565217	53.6957	21.3478	1
2019-05-17	25	502	2019	5	17	1	29.6875	60.8542	2.60417	25.1	Friday	0	0.565217	53.6957	21.3478	2
2019-05-18	24	503	2019	5	18	1	30.875	66.8333	2.72917	26	Saturday	0	0.554167	77.2917	20.0833	1
2019-05-18	24	503	2019	5	18	1	30.875	66.8333	2.72917	26	Saturday	0	0.554167	77.2917	20.0833	2
2019-05-19	19	504	2019	5	19	1	24	69.625	3.125	21.5	Sunday	0	0.570833	72.8261	18.7083	1
2019-05-19	19	504	2019	5	19	1	24	69.625	3.125	21.5	Sunday	0	0.570833	72.8261	18.7083	2
2019-05-20	21	505	2019	5	20	1	26.9458	67.5625	3.875	21.5958	Monday	0	0.645833	68.2917	15.5417	1
2019-05-20	21	505	2019	5	20	1	26.9458	67.5625	3.875	21.5958	Monday	0	0.645833	68.2917	15.5417	2
2019-05-21	15	506	2019	5	21	1	25.7375	72.9792	2.04167	21.7167	Tuesday	0	0.7625	67.5217	29.75	1
2019-05-21	15	506	2019	5	21	1	25.7375	72.9792	2.04167	21.7167	Tuesday	0	0.7625	67.5217	29.75	2
2019-05-22	27	507	2019	5	22	1	26.3318	41.8958	2.02083	22.4682	Wednesday	0	0.679167	103.25	24.4167	1
2019-05-22	27	507	2019	5	22	1	26.3318	41.8958	2.02083	22.4682	Wednesday	0	0.679167	103.25	24.4167	2
2019-05-23	23	508	2019	5	23	1	25.2087	63.875	2.0625	23.2	Thursday	0	0.804167	43.0435	24	1
2019-05-23	23	508	2019	5	23	1	25.2087	63.875	2.0625	23.2	Thursday	0	0.804167	43.0435	24	2
2019-05-24	20	509	2019	5	24	1	26.5208	58.9792	2.4375	22.8292	Friday	0	0.675	72.3333	22.3333	1
2019-05-24	20	509	2019	5	24	1	26.5208	58.9792	2.4375	22.8292	Friday	0	0.675	72.3333	22.3333	2
2019-05-25	26	510	2019	5	25	1	26.8625	60.6042	2.66667	23.5958	Saturday	0	0.566667	49.1667	16.2917	1
2019-05-25	26	510	2019	5	25	1	26.8625	60.6042	2.66667	23.5958	Saturday	0	0.566667	49.1667	16.2917	2
2019-05-26	31	511	2019	5	26	1	27.6792	62.75	2.66667	24.0083	Sunday	0	0.495833	48.375	8.41667	1
2019-05-26	31	511	2019	5	26	1	27.6792	62.75	2.66667	24.0083	Sunday	0	0.495833	48.375	8.41667	2
2019-05-27	21	512	2019	5	27	1	26.9167	74.6042	2.08333	24.1417	Monday	0	0.516667	51.125	9.5	1
2019-05-27	21	512	2019	5	27	1	26.9167	74.6042	2.08333	24.1417	Monday	0	0.516667	51.125	9.5	2
2019-05-28	25	513	2019	5	28	1	26.7208	83.0625	2	23.925	Tuesday	0	0.575	54	13.4583	1
2019-05-28	25	513	2019	5	28	1	26.7208	83.0625	2	23.925	Tuesday	0	0.575	54	13.4583	2
2019-05-29	20	514	2019	5	29	1	24.6833	43.5957	2.70833	22.5333	Wednesday	0	0.708333	29.0417	18.3333	1
2019-05-29	20	514	2019	5	29	1	24.6833	43.5957	2.70833	22.5333	Wednesday	0	0.708333	29.0417	18.3333	2
2019-05-30	19	515	2019	5	30	1	25.1458	62.4043	2.28261	22.9042	Thursday	0	0.595652	56.875	17.2174	1
2019-05-30	19	515	2019	5	30	1	25.1458	62.4043	2.28261	22.9042	Thursday	0	0.595652	56.875	17.2174	2
2019-05-31	30	516	2019	5	31	1	26.4125	59.766	1.58696	24.0583	Friday	0	0.64	41.5	22	1
2019-05-31	30	516	2019	5	31	1	26.4125	59.766	1.58696	24.0583	Friday	0	0.64	41.5	22	2
2019-06-01	25	517	2019	6	1	2	26.2833	69.4375	1.85417	24.1917	Saturday	0	0.689474	41.4211	15.1579	1
2019-06-01	25	517	2019	6	1	2	26.2833	69.4375	1.85417	24.1917	Saturday	0	0.689474	41.4211	15.1579	2
2019-06-02	21	518	2019	6	2	2	26.9917	65.1667	2.25	24.4292	Sunday	0	0.689474	28.6842	10.4737	1
2019-06-02	21	518	2019	6	2	2	26.9917	65.1667	2.25	24.4292	Sunday	0	0.689474	28.6842	10.4737	2
2019-06-03	23	519	2019	6	3	2	28.0625	69.4583	2.04167	24.3417	Monday	0	0.721053	44.2105	16.4737	1
2019-06-03	23	519	2019	6	3	2	28.0625	69.4583	2.04167	24.3417	Monday	0	0.721053	44.2105	16.4737	2
2019-06-04	26	520	2019	6	4	2	26.4208	76.4167	2.39583	23.7167	Tuesday	0	0.722222	44.3333	16.6667	1
2019-06-04	26	520	2019	6	4	2	26.4208	76.4167	2.39583	23.7167	Tuesday	0	0.722222	44.3333	16.6667	2
2019-06-05	15	521	2019	6	5	2	26.9458	47.0833	2.25	25.1	Wednesday	0	0.747059	13.3529	13.1111	1
2019-06-05	15	521	2019	6	5	2	26.9458	47.0833	2.25	25.1	Wednesday	0	0.747059	13.3529	13.1111	2
2019-06-06	29	522	2019	6	6	2	28.1125	63.1957	2.5	25.175	Thursday	0	0.568421	21.7895	9.73684	1
2019-06-06	29	522	2019	6	6	2	28.1125	63.1957	2.5	25.175	Thursday	0	0.568421	21.7895	9.73684	2
2019-06-07	23	523	2019	6	7	2	29.975	53.1458	2.77083	24.7125	Friday	1	0.554167	39	9.54167	1
2019-06-07	23	523	2019	6	7	2	29.975	53.1458	2.77083	24.7125	Friday	1	0.554167	39	9.54167	2
2019-06-08	23	524	2019	6	8	2	29.8417	73.5625	2.85417	24.3333	Saturday	1	0.5375	39.375	8.375	1
2019-06-08	23	524	2019	6	8	2	29.8417	73.5625	2.85417	24.3333	Saturday	1	0.5375	39.375	8.375	2
2019-06-09	35	525	2019	6	9	2	30.9333	69.9792	4.02083	24.4583	Sunday	1	0.520833	40.6667	9.70833	1
2019-06-09	35	525	2019	6	9	2	30.9333	69.9792	4.02083	24.4583	Sunday	1	0.520833	40.6667	9.70833	2
2019-06-10	22	526	2019	6	10	2	26.5542	73.2292	3.25	24.4625	Monday	0	0.570833	34.875	10.9583	1
2019-06-10	22	526	2019	6	10	2	26.5542	73.2292	3.25	24.4625	Monday	0	0.570833	34.875	10.9583	2
2019-06-11	25	527	2019	6	11	2	25.9042	74.8333	1.89583	24.0375	Tuesday	0	0.808696	26.913	14.9565	1
2019-06-11	25	527	2019	6	11	2	25.9042	74.8333	1.89583	24.0375	Tuesday	0	0.808696	26.913	14.9565	2
2019-06-12	15	528	2019	6	12	2	26.8708	48.125	1.85417	24.6917	Wednesday	0	0.808696	41.087	19.7083	1
2019-06-12	15	528	2019	6	12	2	26.8708	48.125	1.85417	24.6917	Wednesday	0	0.808696	41.087	19.7083	2
2019-06-13	21	529	2019	6	13	2	27.775	62.6875	2.375	24.1625	Thursday	0	0.679167	36.5833	14.4583	1
2019-06-13	21	529	2019	6	13	2	27.775	62.6875	2.375	24.1625	Thursday	0	0.679167	36.5833	14.4583	2
2019-06-14	23	530	2019	6	14	2	27.6458	54.125	3.04167	20.2083	Friday	0	0.683333	87.2917	15.5833	1
2019-06-14	23	530	2019	6	14	2	27.6458	54.125	3.04167	20.2083	Friday	0	0.683333	87.2917	15.5833	2
2019-06-15	22	531	2019	6	15	2	28.7833	86.8125	2.16667	20.6125	Saturday	0	0.633333	105.542	20.8333	1
2019-06-15	22	531	2019	6	15	2	28.7833	86.8125	2.16667	20.6125	Saturday	0	0.633333	105.542	20.8333	2
2019-06-16	17	532	2019	6	16	2	28.7708	74.625	2.72917	21.4458	Sunday	0	0.645833	112.333	20.4583	1
2019-06-16	17	532	2019	6	16	2	28.7708	74.625	2.72917	21.4458	Sunday	0	0.645833	112.333	20.4583	2
2019-06-17	24	533	2019	6	17	2	29.2958	68.7292	3.02128	24.25	Monday	0	0.641667	87.4583	19.875	1
2019-06-17	24	533	2019	6	17	2	29.2958	68.7292	3.02128	24.25	Monday	0	0.641667	87.4583	19.875	2
2019-06-18	19	534	2019	6	18	2	27.7292	77.2708	2.16667	25.375	Tuesday	0	0.5625	19.5833	8.5	1
2019-06-18	19	534	2019	6	18	2	27.7292	77.2708	2.16667	25.375	Tuesday	0	0.5625	19.5833	8.5	2
2019-06-19	31	535	2019	6	19	2	29.4375	55.0208	2.5	25.6208	Wednesday	0	0.53913	28.8261	13.0455	1
2019-06-19	31	535	2019	6	19	2	29.4375	55.0208	2.5	25.6208	Wednesday	0	0.53913	28.8261	13.0455	2
2019-06-20	15	536	2019	6	20	2	30.7	60.4255	3.4375	24.9292	Thursday	0	0.521739	31.2609	8.6087	1
2019-06-20	15	536	2019	6	20	2	30.7	60.4255	3.4375	24.9292	Thursday	0	0.521739	31.2609	8.6087	2
2019-06-21	21	537	2019	6	21	2	31.8667	74.7021	3.83333	25.0833	Friday	0	0.570833	45.4583	9.79167	1
2019-06-21	21	537	2019	6	21	2	31.8667	74.7021	3.83333	25.0833	Friday	0	0.570833	45.4583	9.79167	2
2019-06-22	26	538	2019	6	22	2	31.9792	77.6458	4.45833	25.1833	Saturday	0	0.520833	44.5417	9.66667	1
2019-06-22	26	538	2019	6	22	2	31.9792	77.6458	4.45833	25.1833	Saturday	0	0.520833	44.5417	9.66667	2
2019-06-23	19	539	2019	6	23	2	28.6917	71.5417	3.54167	24.525	Sunday	0	0.529167	34.4583	10.9167	1
2019-06-23	19	539	2019	6	23	2	28.6917	71.5417	3.54167	24.525	Sunday	0	0.529167	34.4583	10.9167	2
2019-06-24	19	540	2019	6	24	2	24.8083	71.7292	2.125	23.5625	Monday	0	0.708333	10.125	11.7083	1
2019-06-24	19	540	2019	6	24	2	24.8083	71.7292	2.125	23.5625	Monday	0	0.708333	10.125	11.7083	2
2019-06-25	18	541	2019	6	25	2	28.2833	88.7083	1.5	24.6958	Tuesday	0	0.708696	81.2609	18.2174	1
2019-06-25	18	541	2019	6	25	2	28.2833	88.7083	1.5	24.6958	Tuesday	0	0.708696	81.2609	18.2174	2
2019-06-26	18	542	2019	6	26	2	28.0167	62.617	1.66667	25.3583	Wednesday	0	0.652174	26.2174	12.6957	1
2019-06-26	18	542	2019	6	26	2	28.0167	62.617	1.66667	25.3583	Wednesday	0	0.652174	26.2174	12.6957	2
2019-06-27	22	543	2019	6	27	2	30.7542	57.8958	2.1875	26.05	Thursday	0	0.6125	41.9583	11.4583	1
2019-06-27	22	543	2019	6	27	2	30.7542	57.8958	2.1875	26.05	Thursday	0	0.6125	41.9583	11.4583	2
2019-06-28	26	544	2019	6	28	2	31.6458	90.5532	2.60417	26.0125	Friday	0	0.5625	52.25	12.2917	1
2019-06-28	26	544	2019	6	28	2	31.6458	90.5532	2.60417	26.0125	Friday	0	0.5625	52.25	12.2917	2
2019-06-29	15	545	2019	6	29	2	31.5292	82.913	2.06522	26.3042	Saturday	0	0.508333	54.2917	11.4167	1
2019-06-29	15	545	2019	6	29	2	31.5292	82.913	2.06522	26.3042	Saturday	0	0.508333	54.2917	11.4167	2
2019-06-30	24	546	2019	6	30	2	29.9625	76.1042	2.20833	25.7542	Sunday	0	0.666667	59.5	18.625	1
2019-06-30	24	546	2019	6	30	2	29.9625	76.1042	2.20833	25.7542	Sunday	0	0.666667	59.5	18.625	2
2019-07-01	16	547	2019	7	1	2	31.5917	66	2.47917	24.9042	Monday	0	0.7125	54.5833	18.6667	1
2019-07-01	16	547	2019	7	1	2	31.5917	66	2.47917	24.9042	Monday	0	0.7125	54.5833	18.6667	2
2019-07-02	22	548	2019	7	2	2	28.45	69.25	2.60417	25.2583	Tuesday	0	0.5625	46.4583	10.5	1
2019-07-02	22	548	2019	7	2	2	28.45	69.25	2.60417	25.2583	Tuesday	0	0.5625	46.4583	10.5	2
2019-07-03	19	549	2019	7	3	2	27.875	68.4167	3.58333	25.0958	Wednesday	0	0.575	31.9167	4.59091	1
2019-07-03	19	549	2019	7	3	2	27.875	68.4167	3.58333	25.0958	Wednesday	0	0.575	31.9167	4.59091	2
2019-07-04	16	550	2019	7	4	2	29.2375	53.8261	3.375	25.2125	Thursday	0	0.625	27.7917	5.54167	1
2019-07-04	16	550	2019	7	4	2	29.2375	53.8261	3.375	25.2125	Thursday	0	0.625	27.7917	5.54167	2
2019-07-05	16	551	2019	7	5	2	30.3375	73.5	2.95833	24.5292	Friday	0	0.6	47.2917	10.875	1
2019-07-05	16	551	2019	7	5	2	30.3375	73.5	2.95833	24.5292	Friday	0	0.6	47.2917	10.875	2
2019-07-06	16	552	2019	7	6	2	31.175	76.6458	3.75	25.1208	Saturday	0	0.570833	46.9167	13.6667	1
2019-07-06	16	552	2019	7	6	2	31.175	76.6458	3.75	25.1208	Saturday	0	0.570833	46.9167	13.6667	2
2019-07-07	24	553	2019	7	7	2	29.8542	74.5417	3.64583	25.175	Sunday	0	0.556522	48.087	14.7391	1
2019-07-07	24	553	2019	7	7	2	29.8542	74.5417	3.64583	25.175	Sunday	0	0.556522	48.087	14.7391	2
2019-07-08	21	554	2019	7	8	2	30.8167	59.6667	3.75	24.725	Monday	0	0.545833	49.0833	14.9167	1
2019-07-08	21	554	2019	7	8	2	30.8167	59.6667	3.75	24.725	Monday	0	0.545833	49.0833	14.9167	2
2019-07-09	24	555	2019	7	9	2	28.9875	52.1042	3.52083	24.9958	Tuesday	0	0.53913	47.0909	17.6087	1
2019-07-09	24	555	2019	7	9	2	28.9875	52.1042	3.52083	24.9958	Tuesday	0	0.53913	47.0909	17.6087	2
2019-07-10	20	556	2019	7	10	2	25.8667	64.1739	1.75	24.2292	Wednesday	0	0.658333	11.0833	15.3333	1
2019-07-10	20	556	2019	7	10	2	25.8667	64.1739	1.75	24.2292	Wednesday	0	0.658333	11.0833	15.3333	2
2019-07-11	17	557	2019	7	11	2	26.95	52.5745	1.72917	24.6625	Thursday	0	0.808333	41.5417	19.7083	1
2019-07-11	17	557	2019	7	11	2	26.95	52.5745	1.72917	24.6625	Thursday	0	0.808333	41.5417	19.7083	2
2019-07-12	19	558	2019	7	12	2	29.7542	64.1458	3.3125	25.3917	Friday	0	0.641667	33.75	17.4167	1
2019-07-12	19	558	2019	7	12	2	29.7542	64.1458	3.3125	25.3917	Friday	0	0.641667	33.75	17.4167	2
2019-07-13	15	559	2019	7	13	2	30.8667	75.2708	3.89583	25.075	Saturday	0	0.55	47.0833	20.625	1
2019-07-13	15	559	2019	7	13	2	30.8667	75.2708	3.89583	25.075	Saturday	0	0.55	47.0833	20.625	2
2019-07-14	14	560	2019	7	14	2	28.7917	71.0625	3.45833	25.1167	Sunday	0	0.541667	50.2083	20.9583	1
2019-07-14	14	560	2019	7	14	2	28.7917	71.0625	3.45833	25.1167	Sunday	0	0.541667	50.2083	20.9583	2
2019-07-15	10	561	2019	7	15	2	30.4375	62.7917	2.60417	25.4417	Monday	0	0.5625	46.1667	24.9565	1
2019-07-15	10	561	2019	7	15	2	30.4375	62.7917	2.60417	25.4417	Monday	0	0.5625	46.1667	24.9565	2
2019-07-16	14	562	2019	7	16	2	31.3625	43.1489	1.66667	24.7958	Tuesday	0	0.558333	91.6667	26.75	1
2019-07-16	14	562	2019	7	16	2	31.3625	43.1489	1.66667	24.7958	Tuesday	0	0.558333	91.6667	26.75	2
2019-07-17	23	563	2019	7	17	2	32.4333	68.1458	1.97917	24.7917	Wednesday	0	0.7	99	43	1
2019-07-17	23	563	2019	7	17	2	32.4333	68.1458	1.97917	24.7917	Wednesday	0	0.7	99	43	2
2019-07-18	22	564	2019	7	18	2	31.5833	54.9583	2.77083	24.8292	Thursday	0	0.731818	54.2273	36.4545	1
2019-07-18	22	564	2019	7	18	2	31.5833	54.9583	2.77083	24.8292	Thursday	0	0.731818	54.2273	36.4545	2
2019-07-19	24	565	2019	7	19	2	28.6875	59.2708	2.25	25.1833	Friday	0	0.791667	25.1667	30.625	1
2019-07-19	24	565	2019	7	19	2	28.6875	59.2708	2.25	25.1833	Friday	0	0.791667	25.1667	30.625	2
2019-07-20	18	566	2019	7	20	2	29.1583	81.6667	2.26087	25.1125	Saturday	0	0.829167	46.75	25.1667	1
2019-07-20	18	566	2019	7	20	2	29.1583	81.6667	2.26087	25.1125	Saturday	0	0.829167	46.75	25.1667	2
2019-07-21	22	567	2019	7	21	2	27.6458	75.0208	2.02083	25.325	Sunday	0	0.6375	26.2083	17.8333	1
2019-07-21	22	567	2019	7	21	2	27.6458	75.0208	2.02083	25.325	Sunday	0	0.6375	26.2083	17.8333	2
2019-07-22	9	568	2019	7	22	2	26.6083	80.2708	1.875	24.3083	Monday	0	0.733333	30.2083	23.625	1
2019-07-22	9	568	2019	7	22	2	26.6083	80.2708	1.875	24.3083	Monday	0	0.733333	30.2083	23.625	2
2019-07-23	22	569	2019	7	23	2	27.3167	53.7708	2	24.9208	Tuesday	0	0.708333	28.6667	19.875	1
2019-07-23	22	569	2019	7	23	2	27.3167	53.7708	2	24.9208	Tuesday	0	0.708333	28.6667	19.875	2
2019-07-24	29	570	2019	7	24	2	27.9583	65.6383	2.14583	25.1875	Wednesday	0	0.670833	19.2917	18.75	1
2019-07-24	29	570	2019	7	24	2	27.9583	65.6383	2.14583	25.1875	Wednesday	0	0.670833	19.2917	18.75	2
2019-07-25	20	571	2019	7	25	2	30.4875	54.8333	2.16667	25.1542	Thursday	0	0.633333	48.8333	18.5417	1
2019-07-25	20	571	2019	7	25	2	30.4875	54.8333	2.16667	25.1542	Thursday	0	0.633333	48.8333	18.5417	2
2019-07-26	18	572	2019	7	26	2	31.3792	66.3958	2.25	24.4542	Friday	0	0.558333	52.0833	18.0417	1
2019-07-26	18	572	2019	7	26	2	31.3792	66.3958	2.25	24.4542	Friday	0	0.558333	52.0833	18.0417	2
2019-07-27	24	573	2019	7	27	2	31.5625	71.5833	2.70833	24.7167	Saturday	0	0.475	63.4167	15.4167	1
2019-07-27	24	573	2019	7	27	2	31.5625	71.5833	2.70833	24.7167	Saturday	0	0.475	63.4167	15.4167	2
2019-07-28	21	574	2019	7	28	2	29.3583	71.1458	2.47917	24.3792	Sunday	0	0.595833	28	18.625	1
2019-07-28	21	574	2019	7	28	2	29.3583	71.1458	2.47917	24.3792	Sunday	0	0.595833	28	18.625	2
2019-07-29	14	575	2019	7	29	2	28.8542	75.1875	2.29167	23.7292	Monday	0	0.558333	48.25	17.4167	1
2019-07-29	14	575	2019	7	29	2	28.8542	75.1875	2.29167	23.7292	Monday	0	0.558333	48.25	17.4167	2
2019-07-30	13	576	2019	7	30	2	28.8458	64.0625	2.41667	24.375	Tuesday	0	0.445833	29.5417	9.70833	1
2019-07-30	13	576	2019	7	30	2	28.8458	64.0625	2.41667	24.375	Tuesday	0	0.445833	29.5417	9.70833	2
2019-07-31	10	577	2019	7	31	2	27.1042	64.8542	2.47917	23.5667	Wednesday	0	0.470833	14.5652	9.95833	1
2019-07-31	10	577	2019	7	31	2	27.1042	64.8542	2.47917	23.5667	Wednesday	0	0.470833	14.5652	9.95833	2
2019-08-01	16	578	2019	8	1	2	25.9833	56.8333	4.3125	23.9792	Thursday	0	0.470833	29	6.66667	1
2019-08-01	16	578	2019	8	1	2	25.9833	56.8333	4.3125	23.9792	Thursday	0	0.470833	29	6.66667	2
2019-08-02	13	579	2019	8	2	2	27.2	56.7273	4.47917	24.0208	Friday	0	0.533333	42.7917	11.125	1
2019-08-02	13	579	2019	8	2	2	27.2	56.7273	4.47917	24.0208	Friday	0	0.533333	42.7917	11.125	2
2019-08-03	18	580	2019	8	3	2	26.15	76.6667	2.14583	24.0125	Saturday	0	0.5875	10.375	12.5	1
2019-08-03	18	580	2019	8	3	2	26.15	76.6667	2.14583	24.0125	Saturday	0	0.5875	10.375	12.5	2
2019-08-04	19	581	2019	8	4	2	29.575	80.2292	1.35417	23.8333	Sunday	0	0.575	123.75	27.375	1
2019-08-04	19	581	2019	8	4	2	29.575	80.2292	1.35417	23.8333	Sunday	0	0.575	123.75	27.375	2
2019-08-05	23	582	2019	8	5	2	31.2833	80.25	0.9375	24.6083	Monday	0	0.604545	91.4091	27.3182	1
2019-08-05	23	582	2019	8	5	2	31.2833	80.25	0.9375	24.6083	Monday	0	0.604545	91.4091	27.3182	2
2019-08-06	14	583	2019	8	6	2	28.8625	76.0208	1.8125	24.575	Tuesday	0	0.518182	50.8636	21.7727	1
2019-08-06	14	583	2019	8	6	2	28.8625	76.0208	1.8125	24.575	Tuesday	0	0.518182	50.8636	21.7727	2
2019-08-07	22	584	2019	8	7	2	29.8583	61.1042	1.35417	24.7125	Wednesday	0	0.577273	95.4091	26	1
2019-08-07	22	584	2019	8	7	2	29.8583	61.1042	1.35417	24.7125	Wednesday	0	0.577273	95.4091	26	2
2019-08-08	14	585	2019	8	8	2	32.3583	58.1702	1.60417	24.125	Thursday	0	0.658333	69.5	26.5417	1
2019-08-08	14	585	2019	8	8	2	32.3583	58.1702	1.60417	24.125	Thursday	0	0.658333	69.5	26.5417	2
2019-08-09	17	586	2019	8	9	2	33.3125	60.6304	2.53191	25.0208	Friday	0	0.540909	69	30.9091	1
2019-08-09	17	586	2019	8	9	2	33.3125	60.6304	2.53191	25.0208	Friday	0	0.540909	69	30.9091	2
2019-08-10	13	587	2019	8	10	2	32.2083	70.9375	2.6875	24.9208	Saturday	0	0.586957	64.087	33.2174	1
2019-08-10	13	587	2019	8	10	2	32.2083	70.9375	2.6875	24.9208	Saturday	0	0.586957	64.087	33.2174	2
2019-08-11	14	588	2019	8	11	2	30.8792	86.1042	2.85417	25.7583	Sunday	0	0.5875	75.0417	28.7083	1
2019-08-11	14	588	2019	8	11	2	30.8792	86.1042	2.85417	25.7583	Sunday	0	0.5875	75.0417	28.7083	2
2019-08-12	21	589	2019	8	12	2	30.6417	77.375	2.14583	24.5375	Monday	0	0.573913	83.2609	23.9565	1
2019-08-12	21	589	2019	8	12	2	30.6417	77.375	2.14583	24.5375	Monday	0	0.573913	83.2609	23.9565	2
2019-08-13	17	590	2019	8	13	2	30.7417	75.6875	2.22917	25.0458	Tuesday	0	0.59375	38.125	16.25	1
2019-08-13	17	590	2019	8	13	2	30.7417	75.6875	2.22917	25.0458	Tuesday	0	0.59375	38.125	16.25	2
2019-08-14	12	591	2019	8	14	2	30.9583	62.7447	1.72917	24.3042	Wednesday	0	0.561905	96.5238	23.381	1
2019-08-14	12	591	2019	8	14	2	30.9583	62.7447	1.72917	24.3042	Wednesday	0	0.561905	96.5238	23.381	2
2019-08-15	15	592	2019	8	15	2	29.3542	58.383	2.16667	24.5208	Thursday	0	0.591304	89.8261	21.5833	1
2019-08-15	15	592	2019	8	15	2	29.3542	58.383	2.16667	24.5208	Thursday	0	0.591304	89.8261	21.5833	2
2019-08-16	12	593	2019	8	16	2	28.5458	48.8958	1.97872	24.3125	Friday	0	0.625	73.5	22.75	1
2019-08-16	12	593	2019	8	16	2	28.5458	48.8958	1.97872	24.3125	Friday	0	0.625	73.5	22.75	2
2019-08-17	15	594	2019	8	17	2	27.4458	72.7872	1.89583	25.1333	Saturday	0	0.616667	33.9583	20.8333	1
2019-08-17	15	594	2019	8	17	2	27.4458	72.7872	1.89583	25.1333	Saturday	0	0.616667	33.9583	20.8333	2
2019-08-18	13	595	2019	8	18	2	27.775	80.8125	2.0625	24.9917	Sunday	0	0.554167	25.25	11.5417	1
2019-08-18	13	595	2019	8	18	2	27.775	80.8125	2.0625	24.9917	Sunday	0	0.554167	25.25	11.5417	2
2019-08-19	11	596	2019	8	19	2	29.3625	80.0833	1.39583	25.2833	Monday	0	0.65	63.9167	28.0417	1
2019-08-19	11	596	2019	8	19	2	29.3625	80.0833	1.39583	25.2833	Monday	0	0.65	63.9167	28.0417	2
2019-08-20	15	597	2019	8	20	2	30.1542	65.0625	2.10417	24.4958	Tuesday	0	0.625	57.2083	22.25	1
2019-08-20	15	597	2019	8	20	2	30.1542	65.0625	2.10417	24.4958	Tuesday	0	0.625	57.2083	22.25	2
2019-08-21	19	598	2019	8	21	2	30.1167	63.2917	1.625	24.6708	Wednesday	0	0.635	93.55	34.95	1
2019-08-21	19	598	2019	8	21	2	30.1167	63.2917	1.625	24.6708	Wednesday	0	0.635	93.55	34.95	2
2019-08-22	14	599	2019	8	22	2	30.7292	59.1364	1.72917	24.0708	Thursday	0	0.833333	175.667	34.3333	1
2019-08-22	14	599	2019	8	22	2	30.7292	59.1364	1.72917	24.0708	Thursday	0	0.833333	175.667	34.3333	2
2019-08-23	14	600	2019	8	23	2	29.2875	31.4167	1.58333	24.4917	Friday	0	0.9	12	29	1
2019-08-23	14	600	2019	8	23	2	29.2875	31.4167	1.58333	24.4917	Friday	0	0.9	12	29	2
2019-08-24	19	601	2019	8	24	2	32.825	75.2917	3.20833	24.8	Saturday	0	1	68	97	1
2019-08-24	19	601	2019	8	24	2	32.825	75.2917	3.20833	24.8	Saturday	0	1	68	97	2
2019-08-25	13	602	2019	8	25	2	27.1417	78.75	3.79167	24.2417	Sunday	0	0.9	62.0667	31.0667	1
2019-08-25	13	602	2019	8	25	2	27.1417	78.75	3.79167	24.2417	Sunday	0	0.9	62.0667	31.0667	2
2019-08-26	9	603	2019	8	26	2	26.7917	74.7083	2.83333	24.6292	Monday	0	0.7375	42	14.6667	1
2019-08-26	9	603	2019	8	26	2	26.7917	74.7083	2.83333	24.6292	Monday	0	0.7375	42	14.6667	2
2019-08-27	13	604	2019	8	27	2	28.9958	66.7083	2.02083	25.1125	Tuesday	0	0.75	27.625	16.5833	1
2019-08-27	13	604	2019	8	27	2	28.9958	66.7083	2.02083	25.1125	Tuesday	0	0.75	27.625	16.5833	2
2019-08-28	10	605	2019	8	28	2	31.6208	66.125	2.25	25.4792	Wednesday	0	0.695833	51.5833	21.9167	1
2019-08-28	10	605	2019	8	28	2	31.6208	66.125	2.25	25.4792	Wednesday	0	0.695833	51.5833	21.9167	2
2019-08-29	14	606	2019	8	29	2	29.5583	62.4348	2.875	24.925	Thursday	0	0.795238	37.9524	22.619	1
2019-08-29	14	606	2019	8	29	2	29.5583	62.4348	2.875	24.925	Thursday	0	0.795238	37.9524	22.619	2
2019-08-30	12	607	2019	8	30	2	27.6182	46.3617	2.40909	24.4591	Friday	0	0.8	18	15	1
2019-08-30	12	607	2019	8	30	2	27.6182	46.3617	2.40909	24.4591	Friday	0	0.8	18	15	2
2019-08-31	12	608	2019	8	31	2	27.0292	79.1458	2.1875	24.3333	Saturday	0	0.765217	26.087	14.3913	1
2019-08-31	12	608	2019	8	31	2	27.0292	79.1458	2.1875	24.3333	Saturday	0	0.765217	26.087	14.3913	2
2019-09-01	16	609	2019	9	1	3	27.025	80.0625	2.66667	23.5875	Sunday	0	0.673333	30	10.4667	1
2019-09-01	16	609	2019	9	1	3	27.025	80.0625	2.66667	23.5875	Sunday	0	0.673333	30	10.4667	2
2019-09-02	15	610	2019	9	2	3	26.1917	78.3125	2.9375	23.2833	Monday	0	0.641667	16.1667	7.75	1
2019-09-02	15	610	2019	9	2	3	26.1917	78.3125	2.9375	23.2833	Monday	0	0.641667	16.1667	7.75	2
2019-09-03	14	611	2019	9	3	3	28.1208	68.3958	3.4375	23.0958	Tuesday	0	0.7	43.5455	12	1
2019-09-03	14	611	2019	9	3	3	28.1208	68.3958	3.4375	23.0958	Tuesday	0	0.7	43.5455	12	2
2019-09-04	14	612	2019	9	4	3	28.0042	76.6809	3.08511	23.8875	Wednesday	0	0.735	25.4	14.2381	1
2019-09-04	14	612	2019	9	4	3	28.0042	76.6809	3.08511	23.8875	Wednesday	0	0.735	25.4	14.2381	2
2019-09-05	18	613	2019	9	5	3	27.6917	58.8085	2.35417	24.2375	Thursday	0	0.691667	29.9167	11.7083	1
2019-09-05	18	613	2019	9	5	3	27.6917	58.8085	2.35417	24.2375	Thursday	0	0.691667	29.9167	11.7083	2
2019-09-06	5	614	2019	9	6	3	29.5375	57.6667	1.6875	23.8542	Friday	0	0.716667	52.6667	16.625	1
2019-09-06	5	614	2019	9	6	3	29.5375	57.6667	1.6875	23.8542	Friday	0	0.716667	52.6667	16.625	2
2019-09-07	16	615	2019	9	7	3	31.1292	47	1.58333	24.9833	Saturday	0	0.833333	79.25	30.1667	1
2019-09-07	16	615	2019	9	7	3	31.1292	47	1.58333	24.9833	Saturday	0	0.833333	79.25	30.1667	2
2019-09-08	13	616	2019	9	8	3	29.7208	82.6042	1.70833	24.5083	Sunday	0	0.991667	95.75	33.5	1
2019-09-08	13	616	2019	9	8	3	29.7208	82.6042	1.70833	24.5083	Sunday	0	0.991667	95.75	33.5	2
2019-09-09	12	617	2019	9	9	3	29.7875	73.875	1.93333	24.5833	Monday	0	1.02174	51.3913	36.1364	1
2019-09-09	12	617	2019	9	9	3	29.7875	73.875	1.93333	24.5833	Monday	0	1.02174	51.3913	36.1364	2
2019-09-10	9	618	2019	9	10	3	30.375	76.3958	2.27083	23.9083	Tuesday	0	0.741667	70.9167	18.375	1
2019-09-10	9	618	2019	9	10	3	30.375	76.3958	2.27083	23.9083	Tuesday	0	0.741667	70.9167	18.375	2
2019-09-11	16	619	2019	9	11	3	30.7833	74.0227	2.08333	23.8	Wednesday	0	0.804762	89.8571	30.4348	1
2019-09-11	16	619	2019	9	11	3	30.7833	74.0227	2.08333	23.8	Wednesday	0	0.804762	89.8571	30.4348	2
2019-09-12	9	620	2019	9	12	3	31.3917	56.4583	1.85417	24.4292	Thursday	0	0.745833	96.125	25.4167	1
2019-09-12	9	620	2019	9	12	3	31.3917	56.4583	1.85417	24.4292	Thursday	0	0.745833	96.125	25.4167	2
2019-09-13	9	621	2019	9	13	3	31.5478	62.25	2.08333	25.2652	Friday	1	0.629167	83	20.2917	1
2019-09-13	9	621	2019	9	13	3	31.5478	62.25	2.08333	25.2652	Friday	1	0.629167	83	20.2917	2
2019-09-14	7	622	2019	9	14	3	28.0542	38.8333	2.08333	24.5958	Saturday	1	0.643478	48.5217	11.4783	1
2019-09-14	7	622	2019	9	14	3	28.0542	38.8333	2.08333	24.5958	Saturday	1	0.643478	48.5217	11.4783	2
2019-09-15	22	623	2019	9	15	3	28.8958	83.5833	2.04167	24.05	Sunday	1	0.7375	71.7917	21.4167	1
2019-09-15	22	623	2019	9	15	3	28.8958	83.5833	2.04167	24.05	Sunday	1	0.7375	71.7917	21.4167	2
2019-09-16	11	624	2019	9	16	3	28.5217	68.0208	2.1875	24.1391	Monday	0	0.782609	63.3478	20.4783	1
2019-09-16	11	624	2019	9	16	3	28.5217	68.0208	2.1875	24.1391	Monday	0	0.782609	63.3478	20.4783	2
2019-09-17	14	625	2019	9	17	3	28.625	73.0426	1.85417	24.6708	Tuesday	0	0.790909	66.9091	19.9545	1
2019-09-17	14	625	2019	9	17	3	28.625	73.0426	1.85417	24.6708	Tuesday	0	0.790909	66.9091	19.9545	2
2019-09-18	11	626	2019	9	18	3	29.4909	69.3333	3.70833	20.9136	Wednesday	0	0.905	63.55	30.9	1
2019-09-18	11	626	2019	9	18	3	29.4909	69.3333	3.70833	20.9136	Wednesday	0	0.905	63.55	30.9	2
2019-09-19	8	627	2019	9	19	3	28.2542	55.2766	4.39583	17.9458	Thursday	0	0.795455	122.682	20.3182	1
2019-09-19	8	627	2019	9	19	3	28.2542	55.2766	4.39583	17.9458	Thursday	0	0.795455	122.682	20.3182	2
2019-09-20	14	628	2019	9	20	3	28.025	57.8478	4.60417	13.4667	Friday	0	0.784211	87.6316	24.5263	1
2019-09-20	14	628	2019	9	20	3	28.025	57.8478	4.60417	13.4667	Friday	0	0.784211	87.6316	24.5263	2
2019-09-21	11	629	2019	9	21	3	26.22	39.9583	5.08333	14.815	Saturday	0	0.8	72.4	30.2	1
2019-09-21	11	629	2019	9	21	3	26.22	39.9583	5.08333	14.815	Saturday	0	0.8	72.4	30.2	2
2019-09-22	12	630	2019	9	22	3	26.0458	84.2292	4.625	12.5417	Sunday	0	0.642857	113	23.4286	1
2019-09-22	12	630	2019	9	22	3	26.0458	84.2292	4.625	12.5417	Sunday	0	0.642857	113	23.4286	2
2019-09-23	22	631	2019	9	23	3	25.875	75.9792	3.29167	15.1458	Monday	0	0.595833	87.7917	23.4167	1
2019-09-23	22	631	2019	9	23	3	25.875	75.9792	3.29167	15.1458	Monday	0	0.595833	87.7917	23.4167	2
2019-09-24	24	632	2019	9	24	3	26.0375	65.25	2.33333	12.7167	Tuesday	0	0.723077	97.5385	29.5385	1
2019-09-24	24	632	2019	9	24	3	26.0375	65.25	2.33333	12.7167	Tuesday	0	0.723077	97.5385	29.5385	2
2019-09-25	9	633	2019	9	25	3	26.1542	49.7708	2.15556	14.7667	Wednesday	0	0.881818	88.9545	42.7143	1
2019-09-25	9	633	2019	9	25	3	26.1542	49.7708	2.15556	14.7667	Wednesday	0	0.881818	88.9545	42.7143	2
2019-09-26	10	634	2019	9	26	3	26.4958	58.2917	1.85417	16.7458	Thursday	0	1.05	98.6818	54.3182	1
2019-09-26	10	634	2019	9	26	3	26.4958	58.2917	1.85417	16.7458	Thursday	0	1.05	98.6818	54.3182	2
2019-09-27	14	635	2019	9	27	3	26.2818	58.619	2.35417	16.6409	Friday	0	1.02609	97.3478	50.913	1
2019-09-27	14	635	2019	9	27	3	26.2818	58.619	2.35417	16.6409	Friday	0	1.02609	97.3478	50.913	2
2019-09-28	21	636	2019	9	28	3	27.45	35.7391	1.79167	16.5583	Saturday	0	1.08	78.1	51.75	1
2019-09-28	21	636	2019	9	28	3	27.45	35.7391	1.79167	16.5583	Saturday	0	1.08	78.1	51.75	2
2019-09-29	16	637	2019	9	29	3	27.9708	84.8478	1.91667	16.7042	Sunday	0	1.13182	96.9545	61.3636	1
2019-09-29	16	637	2019	9	29	3	27.9708	84.8478	1.91667	16.7042	Sunday	0	1.13182	96.9545	61.3636	2
2019-09-30	16	638	2019	9	30	3	28.8333	75.625	2.33333	17.6708	Monday	0	1.06087	96.4783	44.5652	1
2019-09-30	16	638	2019	9	30	3	28.8333	75.625	2.33333	17.6708	Monday	0	1.06087	96.4783	44.5652	2
2019-10-01	27	639	2019	10	1	3	29.2917	67.7083	1.39583	19.5708	Tuesday	1	1.23333	122.375	58.4583	1
2019-10-01	27	639	2019	10	1	3	29.2917	67.7083	1.39583	19.5708	Tuesday	1	1.23333	122.375	58.4583	2
2019-10-02	21	640	2019	10	2	3	29.7	46.1064	1.52083	21.1857	Wednesday	1	1.16667	95.0833	57.1667	1
2019-10-02	21	640	2019	10	2	3	29.7	46.1064	1.52083	21.1857	Wednesday	1	1.16667	95.0833	57.1667	2
2019-10-03	12	641	2019	10	3	3	28.6292	54.6739	1.91111	20.1042	Thursday	1	0.771429	124.143	30.5714	1
2019-10-03	12	641	2019	10	3	3	28.6292	54.6739	1.91111	20.1042	Thursday	1	0.771429	124.143	30.5714	2
2019-10-04	13	642	2019	10	4	3	28.6783	64.2826	1.83333	19.5217	Friday	1	0.780952	83.2857	25.6667	1
2019-10-04	13	642	2019	10	4	3	28.6783	64.2826	1.83333	19.5217	Friday	1	0.780952	83.2857	25.6667	2
2019-10-05	19	643	2019	10	5	3	29.1125	24.75	1.8125	20.5125	Saturday	1	0.8375	84.7083	31.7083	1
2019-10-05	19	643	2019	10	5	3	29.1125	24.75	1.8125	20.5125	Saturday	1	0.8375	84.7083	31.7083	2
2019-10-06	17	644	2019	10	6	3	28.1875	85.2174	2.64583	20.4083	Sunday	1	0.795833	68.5	27.0833	1
2019-10-06	17	644	2019	10	6	3	28.1875	85.2174	2.64583	20.4083	Sunday	1	0.795833	68.5	27.0833	2
2019-10-07	17	645	2019	10	7	3	26.5708	72.8958	2	22.9125	Monday	1	0.825	49.0833	26.375	1
2019-10-07	17	645	2019	10	7	3	26.5708	72.8958	2	22.9125	Monday	1	0.825	49.0833	26.375	2
2019-10-08	11	646	2019	10	8	3	27.8125	68.4583	2.44681	22.3375	Tuesday	0	1.0125	63.25	47.4167	1
2019-10-08	11	646	2019	10	8	3	27.8125	68.4583	2.44681	22.3375	Tuesday	0	1.0125	63.25	47.4167	2
2019-10-09	15	647	2019	10	9	3	26.8042	52.75	1.91667	22.3708	Wednesday	0	1.02857	90.5455	45.2273	1
2019-10-09	15	647	2019	10	9	3	26.8042	52.75	1.91667	22.3708	Wednesday	0	1.02857	90.5455	45.2273	2
2019-10-10	13	648	2019	10	10	3	28.0125	56.3478	1.4375	21.8167	Thursday	0	1.02	106.9	36.1	1
2019-10-10	13	648	2019	10	10	3	28.0125	56.3478	1.4375	21.8167	Thursday	0	1.02	106.9	36.1	2
2019-10-11	10	649	2019	10	11	3	28.4625	78.7955	1.5	22.1208	Friday	0	1.04211	118.211	43.2632	1
2019-10-11	10	649	2019	10	11	3	28.4625	78.7955	1.5	22.1208	Friday	0	1.04211	118.211	43.2632	2
2019-10-12	15	650	2019	10	12	3	29.0625	31.7708	1.33333	22.3792	Saturday	0	1.0875	116.208	47.125	1
2019-10-12	15	650	2019	10	12	3	29.0625	31.7708	1.33333	22.3792	Saturday	0	1.0875	116.208	47.125	2
2019-10-13	13	651	2019	10	13	3	26.2542	87.5833	2.25	21.7292	Sunday	0	1.025	69.7917	35.7083	1
2019-10-13	13	651	2019	10	13	3	26.2542	87.5833	2.25	21.7292	Sunday	0	1.025	69.7917	35.7083	2
2019-10-14	12	652	2019	10	14	3	26.3292	68.5625	4.33333	18.7958	Monday	0	1.1375	61	38.3333	1
2019-10-14	12	652	2019	10	14	3	26.3292	68.5625	4.33333	18.7958	Monday	0	1.1375	61	38.3333	2
2019-10-15	13	653	2019	10	15	3	25.6625	63.5208	4.02083	18.4417	Tuesday	0	0.982609	57.7273	32.25	1
2019-10-15	13	653	2019	10	15	3	25.6625	63.5208	4.02083	18.4417	Tuesday	0	0.982609	57.7273	32.25	2
2019-10-16	8	654	2019	10	16	3	25.0583	55.0213	2.77083	17.8708	Wednesday	0	0.6875	65.5	30.5417	1
2019-10-16	8	654	2019	10	16	3	25.0583	55.0213	2.77083	17.8708	Wednesday	0	0.6875	65.5	30.5417	2
2019-10-17	9	655	2019	10	17	3	25.275	56.617	3.91667	15.8708	Thursday	0	0.645833	73.5417	29.0417	1
2019-10-17	9	655	2019	10	17	3	25.275	56.617	3.91667	15.8708	Thursday	0	0.645833	73.5417	29.0417	2
2019-10-18	10	656	2019	10	18	3	24.85	84.0213	3.4375	14.6583	Friday	0	0.666667	90.4583	29.875	1
2019-10-18	10	656	2019	10	18	3	24.85	84.0213	3.4375	14.6583	Friday	0	0.666667	90.4583	29.875	2
2019-10-19	8	657	2019	10	19	3	24.9292	69.1458	2.72917	15.7292	Saturday	0	0.742857	84.7619	36.9524	1
2019-10-19	8	657	2019	10	19	3	24.9292	69.1458	2.72917	15.7292	Saturday	0	0.742857	84.7619	36.9524	2
2019-10-20	14	658	2019	10	20	3	24.3708	85.125	1.875	13.6542	Sunday	0	0.775	70.4583	44.0833	1
2019-10-20	14	658	2019	10	20	3	24.3708	85.125	1.875	13.6542	Sunday	0	0.775	70.4583	44.0833	2
2019-10-21	19	659	2019	10	21	3	24.2958	68.0208	1.79167	14.7833	Monday	0	0.8125	88.25	46.4167	1
2019-10-21	19	659	2019	10	21	3	24.2958	68.0208	1.79167	14.7833	Monday	0	0.8125	88.25	46.4167	2
2019-10-22	12	660	2019	10	22	3	24.9083	67.0417	2.35417	16.9333	Tuesday	0	0.7125	121.667	38.4583	1
2019-10-22	12	660	2019	10	22	3	24.9083	67.0417	2.35417	16.9333	Tuesday	0	0.7125	121.667	38.4583	2
2019-10-23	16	661	2019	10	23	3	25.2708	49.7083	2.64583	17.2708	Wednesday	0	0.747826	113.042	39.875	1
2019-10-23	16	661	2019	10	23	3	25.2708	49.7083	2.64583	17.2708	Wednesday	0	0.747826	113.042	39.875	2
2019-10-24	11	662	2019	10	24	3	24.2292	59.3958	3.125	17.375	Thursday	0	0.775	75.375	45.9583	1
2019-10-24	11	662	2019	10	24	3	24.2292	59.3958	3.125	17.375	Thursday	0	0.775	75.375	45.9583	2
2019-10-25	12	663	2019	10	25	3	26.4125	71.0909	1.75	19.0958	Friday	0	0.8125	94.875	49.5	1
2019-10-25	12	663	2019	10	25	3	26.4125	71.0909	1.75	19.0958	Friday	0	0.8125	94.875	49.5	2
2019-10-26	9	664	2019	10	26	3	23.3208	73.4375	3.29167	16.8042	Saturday	0	0.85	56.25	44.4167	1
2019-10-26	9	664	2019	10	26	3	23.3208	73.4375	3.29167	16.8042	Saturday	0	0.85	56.25	44.4167	2
2019-10-27	12	665	2019	10	27	3	23.6042	80.125	2.70213	16.6333	Sunday	0	0.858333	73.75	37.75	1
2019-10-27	12	665	2019	10	27	3	23.6042	80.125	2.70213	16.6333	Sunday	0	0.858333	73.75	37.75	2
2019-10-28	18	666	2019	10	28	3	19.0417	72.4792	4.38298	14.675	Monday	0	0.965217	31.4091	25.8333	1
2019-10-28	18	666	2019	10	28	3	19.0417	72.4792	4.38298	14.675	Monday	0	0.965217	31.4091	25.8333	2
2019-10-29	6	667	2019	10	29	3	21.7208	64.9149	4.59574	9.38333	Tuesday	0	0.733333	68.5417	16.0417	1
2019-10-29	6	667	2019	10	29	3	21.7208	64.9149	4.59574	9.38333	Tuesday	0	0.733333	68.5417	16.0417	2
2019-10-30	13	668	2019	10	30	3	21.8667	61.8478	3.125	10.05	Wednesday	0	0.704348	56.913	31.25	1
2019-10-30	13	668	2019	10	30	3	21.8667	61.8478	3.125	10.05	Wednesday	0	0.704348	56.913	31.25	2
2019-10-31	15	669	2019	10	31	3	22.5083	66.5208	1.8125	13.125	Thursday	0	0.716667	53.9583	40.25	1
2019-10-31	15	669	2019	10	31	3	22.5083	66.5208	1.8125	13.125	Thursday	0	0.716667	53.9583	40.25	2
2019-11-01	18	670	2019	11	1	3	25.1	72.907	1.41667	15.7875	Friday	0	0.975	64.4583	49.875	1
2019-11-01	18	670	2019	11	1	3	25.1	72.907	1.41667	15.7875	Friday	0	0.975	64.4583	49.875	2
2019-11-02	12	671	2019	11	2	3	26.0583	76.9583	1.52174	16.3208	Saturday	0	1	84.4167	50.4583	1
2019-11-02	12	671	2019	11	2	3	26.0583	76.9583	1.52174	16.3208	Saturday	0	1	84.4167	50.4583	2
2019-11-03	13	672	2019	11	3	3	25.6667	82.375	4	13	Sunday	0	0.870833	93.0417	46.9167	1
2019-11-03	13	672	2019	11	3	3	25.6667	82.375	4	13	Sunday	0	0.870833	93.0417	46.9167	2
2019-11-04	15	673	2019	11	4	3	23.7667	67.25	6.22917	8.875	Monday	0	0.795833	141.75	46.25	1
2019-11-04	15	673	2019	11	4	3	23.7667	67.25	6.22917	8.875	Monday	0	0.795833	141.75	46.25	2
2019-11-05	13	674	2019	11	5	3	21.65	50.5625	4.16667	11.0292	Tuesday	0	0.786957	127.609	50.087	1
2019-11-05	13	674	2019	11	5	3	21.65	50.5625	4.16667	11.0292	Tuesday	0	0.786957	127.609	50.087	2
2019-11-06	12	675	2019	11	6	3	22.35	70.625	1.85417	11.1583	Wednesday	0	0.813043	71.8261	44.2917	1
2019-11-06	12	675	2019	11	6	3	22.35	70.625	1.85417	11.1583	Wednesday	0	0.813043	71.8261	44.2917	2
2019-11-07	21	676	2019	11	7	3	23.0368	70.4894	4.16667	9.18947	Thursday	0	0.745833	89.1667	40.7083	1
2019-11-07	21	676	2019	11	7	3	23.0368	70.4894	4.16667	9.18947	Thursday	0	0.745833	89.1667	40.7083	2
2019-11-08	13	677	2019	11	8	3	21.1917	75.25	4.64583	8.1125	Friday	0	0.716667	97.7083	34.375	1
2019-11-08	13	677	2019	11	8	3	21.1917	75.25	4.64583	8.1125	Friday	0	0.716667	97.7083	34.375	2
2019-11-09	12	678	2019	11	9	3	20.725	71.8958	2.1875	11.0083	Saturday	0	0.821739	73.6957	40.913	1
2019-11-09	12	678	2019	11	9	3	20.725	71.8958	2.1875	11.0083	Saturday	0	0.821739	73.6957	40.913	2
2019-11-10	25	679	2019	11	10	3	21.0583	88.8542	1.89362	10.9667	Sunday	0	0.878261	66	54.2727	1
2019-11-10	25	679	2019	11	10	3	21.0583	88.8542	1.89362	10.9667	Sunday	0	0.878261	66	54.2727	2
2019-11-11	19	680	2019	11	11	3	21.9167	68.5417	1.69565	11.325	Monday	0	0.791667	82.4583	59.75	1
2019-11-11	19	680	2019	11	11	3	21.9167	68.5417	1.69565	11.325	Monday	0	0.791667	82.4583	59.75	2
2019-11-12	13	681	2019	11	12	3	22.6167	46.1667	2.02083	16.4417	Tuesday	0	0.575	68.4583	35.1667	1
2019-11-12	13	681	2019	11	12	3	22.6167	46.1667	2.02083	16.4417	Tuesday	0	0.575	68.4583	35.1667	2
2019-11-13	20	682	2019	11	13	3	23.7458	69.2083	3.34043	14.4833	Wednesday	0	0.717391	84.4583	47.2174	1
2019-11-13	20	682	2019	11	13	3	23.7458	69.2083	3.34043	14.4833	Wednesday	0	0.717391	84.4583	47.2174	2
2019-11-14	12	683	2019	11	14	3	20.6958	76.9375	4.08696	11.7958	Thursday	0	0.6375	92	42.5833	1
2019-11-14	12	683	2019	11	14	3	20.6958	76.9375	4.08696	11.7958	Thursday	0	0.6375	92	42.5833	2
2019-11-15	12	684	2019	11	15	3	21.7167	54.2973	1.53333	14.9292	Friday	0	0.9125	90	66.0833	1
2019-11-15	12	684	2019	11	15	3	21.7167	54.2973	1.53333	14.9292	Friday	0	0.9125	90	66.0833	2
2019-11-16	14	685	2019	11	16	3	21.35	70.9167	1.45455	16.1125	Saturday	0	0.691667	72.0833	44.125	1
2019-11-16	14	685	2019	11	16	3	21.35	70.9167	1.45455	16.1125	Saturday	0	0.691667	72.0833	44.125	2
2019-11-17	9	686	2019	11	17	3	23.2583	82.1522	1.875	16.55	Sunday	0	0.676471	63.2941	35.2941	1
2019-11-17	9	686	2019	11	17	3	23.2583	82.1522	1.875	16.55	Sunday	0	0.676471	63.2941	35.2941	2
2019-11-18	20	687	2019	11	18	3	19.675	78.1333	5.55319	11.0625	Monday	0	0.93913	56.5	45.8636	1
2019-11-18	20	687	2019	11	18	3	19.675	78.1333	5.55319	11.0625	Monday	0	0.93913	56.5	45.8636	2
2019-11-19	9	688	2019	11	19	3	18.2417	60.4792	4.82609	8.28333	Tuesday	0	0.7	69.25	21.2917	1
2019-11-19	9	688	2019	11	19	3	18.2417	60.4792	4.82609	8.28333	Tuesday	0	0.7	69.25	21.2917	2
2019-11-20	14	689	2019	11	20	3	18.7083	65.4167	2.6087	9.41667	Wednesday	0	0.666667	67.25	31.2917	1
2019-11-20	14	689	2019	11	20	3	18.7083	65.4167	2.6087	9.41667	Wednesday	0	0.666667	67.25	31.2917	2
2019-11-21	12	690	2019	11	21	3	19.8167	75.2708	1.78261	8.9375	Thursday	0	0.75	55.6087	41.7083	1
2019-11-21	12	690	2019	11	21	3	19.8167	75.2708	1.78261	8.9375	Thursday	0	0.75	55.6087	41.7083	2
2019-11-22	13	691	2019	11	22	3	21.1696	62.913	0.854167	10.9043	Friday	0	0.7625	44.625	45.0417	1
2019-11-22	13	691	2019	11	22	3	21.1696	62.913	0.854167	10.9043	Friday	0	0.7625	44.625	45.0417	2
2019-11-23	16	692	2019	11	23	3	21.4364	70.9792	1.14583	14.2773	Saturday	0	1.07826	67.5217	69.4783	1
2019-11-23	16	692	2019	11	23	3	21.4364	70.9792	1.14583	14.2773	Saturday	0	1.07826	67.5217	69.4783	2
2019-11-24	14	693	2019	11	24	3	22.8292	73.7917	1.39583	14.5167	Sunday	0	0.979167	68.3333	47.5833	1
2019-11-24	14	693	2019	11	24	3	22.8292	73.7917	1.39583	14.5167	Sunday	0	0.979167	68.3333	47.5833	2
2019-11-25	12	694	2019	11	25	3	22.1292	73.75	3.95833	11.775	Monday	0	0.934783	62.8636	57.8261	1
2019-11-25	12	694	2019	11	25	3	22.1292	73.75	3.95833	11.775	Monday	0	0.934783	62.8636	57.8261	2
2019-11-26	8	695	2019	11	26	3	20.445	66.6458	2.9375	12.755	Tuesday	0	0.895652	63.4348	43.2917	1
2019-11-26	8	695	2019	11	26	3	20.445	66.6458	2.9375	12.755	Tuesday	0	0.895652	63.4348	43.2917	2
2019-11-27	15	696	2019	11	27	3	20.475	70.1458	3.48936	11.1	Wednesday	0	0.879167	64.7083	41.0833	1
2019-11-27	15	696	2019	11	27	3	20.475	70.1458	3.48936	11.1	Wednesday	0	0.879167	64.7083	41.0833	2
2019-11-28	9	697	2019	11	28	3	15.6125	77.8333	6.82979	5.9125	Thursday	0	0.708333	34.9583	15.1667	1
2019-11-28	9	697	2019	11	28	3	15.6125	77.8333	6.82979	5.9125	Thursday	0	0.708333	34.9583	15.1667	2
2019-11-29	13	698	2019	11	29	3	15.5417	88.85	3.39583	8.04167	Friday	0	0.666667	42.9583	22.0833	1
2019-11-29	13	698	2019	11	29	3	15.5417	88.85	3.39583	8.04167	Friday	0	0.666667	42.9583	22.0833	2
2019-11-30	7	699	2019	11	30	3	18.5375	62.9375	2	11.0917	Saturday	0	0.854167	41.125	35.5417	1
2019-11-30	7	699	2019	11	30	3	18.5375	62.9375	2	11.0917	Saturday	0	0.854167	41.125	35.5417	2
2019-12-01	7	700	2019	12	1	4	17.6667	71.8958	4.27083	8.35417	Sunday	0	0.85	51.9167	40.2917	1
2019-12-01	7	700	2019	12	1	4	17.6667	71.8958	4.27083	8.35417	Sunday	0	0.85	51.9167	40.2917	2
2019-12-02	13	701	2019	12	2	4	14.275	74.875	6.60417	-0.45	Monday	0	0.5875	55.0833	21.0417	1
2019-12-02	13	701	2019	12	2	4	14.275	74.875	6.60417	-0.45	Monday	0	0.5875	55.0833	21.0417	2
2019-12-03	13	702	2019	12	3	4	14.1167	72.1875	6.08511	-3.1	Tuesday	0	0.468182	79.5909	30.1304	1
2019-12-03	13	702	2019	12	3	4	14.1167	72.1875	6.08511	-3.1	Tuesday	0	0.468182	79.5909	30.1304	2
2019-12-04	17	703	2019	12	4	4	16.1208	65.5833	5.75	-6.28333	Wednesday	0	0.579167	73.8333	34.2083	1
2019-12-04	17	703	2019	12	4	4	16.1208	65.5833	5.75	-6.28333	Wednesday	0	0.579167	73.8333	34.2083	2
2019-12-05	8	704	2019	12	5	4	16.2792	86.6042	6.06383	-7.81667	Thursday	0	0.525	63.125	29.4167	1
2019-12-05	8	704	2019	12	5	4	16.2792	86.6042	6.06383	-7.81667	Thursday	0	0.525	63.125	29.4167	2
2019-12-06	14	705	2019	12	6	4	14.7833	93.8864	5.97727	-6.19583	Friday	0	0.5125	79.0833	29.4583	1
2019-12-06	14	705	2019	12	6	4	14.7833	93.8864	5.97727	-6.19583	Friday	0	0.5125	79.0833	29.4583	2
2019-12-07	13	706	2019	12	7	4	14.2208	60.5833	5.54167	-4.39167	Saturday	0	0.5375	87.0417	29.3333	1
2019-12-07	13	706	2019	12	7	4	14.2208	60.5833	5.54167	-4.39167	Saturday	0	0.5375	87.0417	29.3333	2
2019-12-08	17	707	2019	12	8	4	13.95	67.2292	2.66667	-0.266667	Sunday	0	0.633333	56.0417	34.0417	1
2019-12-08	17	707	2019	12	8	4	13.95	67.2292	2.66667	-0.266667	Sunday	0	0.633333	56.0417	34.0417	2
2019-12-09	14	708	2019	12	9	4	14.5167	70.25	1.4375	2.57083	Monday	0	0.73913	30.6957	44.6957	1
2019-12-09	14	708	2019	12	9	4	14.5167	70.25	1.4375	2.57083	Monday	0	0.73913	30.6957	44.6957	2
2019-12-10	9	709	2019	12	10	4	15.5917	76.1064	1.29787	4.39167	Tuesday	0	0.95	27.8636	55.8636	1
2019-12-10	9	709	2019	12	10	4	15.5917	76.1064	1.29787	4.39167	Tuesday	0	0.95	27.8636	55.8636	2
2019-12-11	14	710	2019	12	11	4	17.1125	67.617	1.5	4.875	Wednesday	0	0.995238	41.9545	62.7727	1
2019-12-11	14	710	2019	12	11	4	17.1125	67.617	1.5	4.875	Wednesday	0	0.995238	41.9545	62.7727	2
2019-12-12	18	711	2019	12	12	4	17.4708	72.0417	1.47917	6.74583	Thursday	0	1.02083	46.9583	69.2083	1
2019-12-12	18	711	2019	12	12	4	17.4708	72.0417	1.47917	6.74583	Thursday	0	1.02083	46.9583	69.2083	2
2019-12-13	11	712	2019	12	13	4	18.7583	92.8462	1.125	11.325	Friday	0	1.15	51.1667	68.2917	1
2019-12-13	11	712	2019	12	13	4	18.7583	92.8462	1.125	11.325	Friday	0	1.15	51.1667	68.2917	2
2019-12-14	13	713	2019	12	14	4	19.0458	71.375	1.14894	12.6333	Saturday	0	1.1875	50.2083	80.2083	1
2019-12-14	13	713	2019	12	14	4	19.0458	71.375	1.14894	12.6333	Saturday	0	1.1875	50.2083	80.2083	2
2019-12-15	16	714	2019	12	15	4	20.6667	81.5208	1.52083	14.525	Sunday	0	0.904348	33.7391	58.6667	1
2019-12-15	16	714	2019	12	15	4	20.6667	81.5208	1.52083	14.525	Sunday	0	0.904348	33.7391	58.6667	2
2019-12-16	28	715	2019	12	16	4	22.4875	65.5833	1.65217	16.4667	Monday	0	0.758333	32.9167	32.5	1
2019-12-16	28	715	2019	12	16	4	22.4875	65.5833	1.65217	16.4667	Monday	0	0.758333	32.9167	32.5	2
2019-12-17	13	716	2019	12	17	4	22.8833	78.8958	1.25	17.8	Tuesday	0	0.904348	21.3478	37.4583	1
2019-12-17	13	716	2019	12	17	4	22.8833	78.8958	1.25	17.8	Tuesday	0	0.904348	21.3478	37.4583	2
2019-12-18	13	717	2019	12	18	4	22.2083	54.75	2.23404	15.625	Wednesday	0	0.883333	45.8333	36.5833	1
2019-12-18	13	717	2019	12	18	4	22.2083	54.75	2.23404	15.625	Wednesday	0	0.883333	45.8333	36.5833	2
2019-12-19	12	718	2019	12	19	4	14.3708	67.5208	4.66667	8.87083	Thursday	0	1.2125	8.66667	50.875	1
2019-12-19	12	718	2019	12	19	4	14.3708	67.5208	4.66667	8.87083	Thursday	0	1.2125	8.66667	50.875	2
2019-12-20	12	719	2019	12	20	4	14.7042	72.8958	3.6875	8.10833	Friday	0	1.23333	30.5	23.5417	1
2019-12-20	12	719	2019	12	20	4	14.7042	72.8958	3.6875	8.10833	Friday	0	1.23333	30.5	23.5417	2
2019-12-21	24	720	2019	12	21	4	17.2625	72.4792	1.85106	10.875	Saturday	0	1.10417	12.9167	28	1
2019-12-21	24	720	2019	12	21	4	17.2625	72.4792	1.85106	10.875	Saturday	0	1.10417	12.9167	28	2
2019-12-22	19	721	2019	12	22	4	16.9875	89	2.91667	11.0292	Sunday	0	1.18182	17.0435	41.5833	1
2019-12-22	19	721	2019	12	22	4	16.9875	89	2.91667	11.0292	Sunday	0	1.18182	17.0435	41.5833	2
2019-12-23	18	722	2019	12	23	4	20.5958	61.0417	1.8125	15.1208	Monday	0	1.1	29.3571	43.8571	1
2019-12-23	18	722	2019	12	23	4	20.5958	61.0417	1.8125	15.1208	Monday	0	1.1	29.3571	43.8571	2
2019-12-24	16	723	2019	12	24	4	17.525	81.8125	2.38298	14.3417	Tuesday	0	1.05652	14.087	33.3333	1
2019-12-24	16	723	2019	12	24	4	17.525	81.8125	2.38298	14.3417	Tuesday	0	1.05652	14.087	33.3333	2
2019-12-25	14	724	2019	12	25	4	18.9542	60.0833	1.61364	14.6125	Wednesday	0	1.04583	37.4167	45.625	1
2019-12-25	14	724	2019	12	25	4	18.9542	60.0833	1.61364	14.6125	Wednesday	0	1.04583	37.4167	45.625	2
2019-12-26	19	725	2019	12	26	4	16.2125	61.3542	4.5625	9.49583	Thursday	0	1.09167	27.2917	42.75	1
2019-12-26	19	725	2019	12	26	4	16.2125	61.3542	4.5625	9.49583	Thursday	0	1.09167	27.2917	42.75	2
2019-12-27	26	726	2019	12	27	4	14.5208	71.9583	4.58333	4.775	Friday	0	0.883333	43.375	19.0417	1
2019-12-27	26	726	2019	12	27	4	14.5208	71.9583	4.58333	4.775	Friday	0	0.883333	43.375	19.0417	2
2019-12-28	33	727	2019	12	28	4	16.4042	71.8125	1.74468	6.59167	Saturday	0	0.916667	47.0417	45.1667	1
2019-12-28	33	727	2019	12	28	4	16.4042	71.8125	1.74468	6.59167	Saturday	0	0.916667	47.0417	45.1667	2
2019-12-29	21	728	2019	12	29	4	20.1833	86.5833	1.375	11.2083	Sunday	0	1.11667	28.9167	69.8333	1
2019-12-29	21	728	2019	12	29	4	20.1833	86.5833	1.375	11.2083	Sunday	0	1.11667	28.9167	69.8333	2
2019-12-30	30	729	2019	12	30	4	23	55.625	1.91489	13.6708	Monday	0	1.18333	42.6667	71.3333	1
2019-12-30	30	729	2019	12	30	4	23	55.625	1.91489	13.6708	Monday	0	1.18333	42.6667	71.3333	2
2019-12-31	19	730	2019	12	31	4	19.3091	76.625	4.79167	9.95909	Tuesday	0	0.895833	46.7917	37.9583	1
2019-12-31	19	730	2019	12	31	4	19.3091	76.625	4.79167	9.95909	Tuesday	0	0.895833	46.7917	37.9583	2
2020-01-01	21	731	2020	1	1	4	16.7417	65.8542	2.34783	11.3	Wednesday	1	0.9	26.6522	43.1667	1
2020-01-01	21	731	2020	1	1	4	16.7417	65.8542	2.34783	11.3	Wednesday	1	0.9	26.6522	43.1667	2
2020-01-02	24	732	2020	1	2	4	17.025	57.7021	1.66667	12.8167	Thursday	0	0.958333	17.5417	41.625	1
2020-01-02	24	732	2020	1	2	4	17.025	57.7021	1.66667	12.8167	Thursday	0	0.958333	17.5417	41.625	2
2020-01-03	9	733	2020	1	3	4	19.0792	76.1778	1.27083	13.4333	Friday	0	1.04167	31.2917	47.4167	1
2020-01-03	9	733	2020	1	3	4	19.0792	76.1778	1.27083	13.4333	Friday	0	1.04167	31.2917	47.4167	2
2020-01-04	11	734	2020	1	4	4	19.9333	62.5208	1.25	13.6875	Saturday	0	1.05833	56.6818	75.6667	1
2020-01-04	11	734	2020	1	4	4	19.9333	62.5208	1.25	13.6875	Saturday	0	1.05833	56.6818	75.6667	2
2020-01-05	24	735	2020	1	5	4	20.9	82.8542	1.16667	15.5125	Sunday	0	0.783333	54.7083	40.875	1
2020-01-05	24	735	2020	1	5	4	20.9	82.8542	1.16667	15.5125	Sunday	0	0.783333	54.7083	40.875	2
2020-01-06	16	736	2020	1	6	4	22.2542	85.9167	1.60417	16.5167	Monday	0	0.6875	45.8333	20.0417	1
2020-01-06	16	736	2020	1	6	4	22.2542	85.9167	1.60417	16.5167	Monday	0	0.6875	45.8333	20.0417	2
2020-01-07	26	737	2020	1	7	4	21.6958	75.25	1.65957	15.7542	Tuesday	0	0.795833	34.4583	32.2609	1
2020-01-07	26	737	2020	1	7	4	21.6958	75.25	1.65957	15.7542	Tuesday	0	0.795833	34.4583	32.2609	2
2020-01-08	19	738	2020	1	8	4	20.0042	71.7917	2.41667	10.7958	Wednesday	0	0.729167	45.5417	27.75	1
2020-01-08	19	738	2020	1	8	4	20.0042	71.7917	2.41667	10.7958	Wednesday	0	0.729167	45.5417	27.75	2
2020-01-09	12	739	2020	1	9	4	20.1417	60.2292	2.04167	13.4	Thursday	0	0.916667	43.125	35.25	1
2020-01-09	12	739	2020	1	9	4	20.1417	60.2292	2.04167	13.4	Thursday	0	0.916667	43.125	35.25	2
2020-01-10	19	740	2020	1	10	4	21.0292	72.9773	1.91667	15.4917	Friday	0	0.9	41.25	29.375	1
2020-01-10	19	740	2020	1	10	4	21.0292	72.9773	1.91667	15.4917	Friday	0	0.9	41.25	29.375	2
2020-01-11	21	741	2020	1	11	4	14.8524	66.5	4.10417	9.37143	Saturday	0	0.928571	25.7619	35.2381	1
2020-01-11	21	741	2020	1	11	4	14.8524	66.5	4.10417	9.37143	Saturday	0	0.928571	25.7619	35.2381	2
2020-01-12	11	742	2020	1	12	4	13.9875	60.2708	4.41667	4.75417	Sunday	0	0.991667	40.75	11.5417	1
2020-01-12	11	742	2020	1	12	4	13.9875	60.2708	4.41667	4.75417	Sunday	0	0.991667	40.75	11.5417	2
2020-01-13	13	743	2020	1	13	4	15.6091	93.1458	2.02128	8.33636	Monday	0	1.0125	23.875	28.8333	1
2020-01-13	13	743	2020	1	13	4	15.6091	93.1458	2.02128	8.33636	Monday	0	1.0125	23.875	28.8333	2
2020-01-14	11	744	2020	1	14	4	16.4125	64.3958	2.5625	9.375	Tuesday	0	1.04167	39.3333	38.7083	1
2020-01-14	11	744	2020	1	14	4	16.4125	64.3958	2.5625	9.375	Tuesday	0	1.04167	39.3333	38.7083	2
2020-01-15	14	745	2020	1	15	4	19.9458	55.3333	2.72917	13.6917	Wednesday	0	0.8375	47.125	31.2917	1
2020-01-15	14	745	2020	1	15	4	19.9458	55.3333	2.72917	13.6917	Wednesday	0	0.8375	47.125	31.2917	2
2020-01-16	19	746	2020	1	16	4	16.2083	64.8333	3.35417	10.5375	Thursday	0	0.904167	46.4583	32.4583	1
2020-01-16	19	746	2020	1	16	4	16.2083	64.8333	3.35417	10.5375	Thursday	0	0.904167	46.4583	32.4583	2
2020-01-17	14	747	2020	1	17	4	12.8958	71.1136	4.95652	5.20417	Friday	0	1.2	30.9167	10.625	1
2020-01-17	14	747	2020	1	17	4	12.8958	71.1136	4.95652	5.20417	Friday	0	1.2	30.9167	10.625	2
2020-01-18	12	748	2020	1	18	4	14.0583	72.5	2.64583	6.10833	Saturday	0	1.15833	33.875	24.1667	1
2020-01-18	12	748	2020	1	18	4	14.0583	72.5	2.64583	6.10833	Saturday	0	1.15833	33.875	24.1667	2
2020-01-19	14	749	2020	1	19	4	11.9417	59.9583	3.54167	6.53333	Sunday	0	1.04583	25.3333	28.4583	1
2020-01-19	14	749	2020	1	19	4	11.9417	59.9583	3.54167	6.53333	Sunday	0	1.04583	25.3333	28.4583	2
2020-01-20	10	750	2020	1	20	4	15.4542	88.1667	1.5	9.1125	Monday	0	0.93	34.8	23.05	1
2020-01-20	10	750	2020	1	20	4	15.4542	88.1667	1.5	9.1125	Monday	0	0.93	34.8	23.05	2
2020-01-21	8	751	2020	1	21	4	18.2458	70.125	1.91489	12.9542	Tuesday	0	0.991667	51.9167	34.0833	1
2020-01-21	8	751	2020	1	21	4	18.2458	70.125	1.91489	12.9542	Tuesday	0	0.991667	51.9167	34.0833	2
2020-01-22	11	752	2020	1	22	4	20.8792	55.8085	1.47917	15.8042	Wednesday	0	0.831579	84.4737	26.2105	1
2020-01-22	11	752	2020	1	22	4	20.8792	55.8085	1.47917	15.8042	Wednesday	0	0.831579	84.4737	26.2105	2
2020-01-23	7	753	2020	1	23	4	22.4833	79.913	1.8125	16.5958	Thursday	0	0.720833	56.9167	20.0417	1
2020-01-23	7	753	2020	1	23	4	22.4833	79.913	1.8125	16.5958	Thursday	0	0.720833	56.9167	20.0417	2
2020-01-24	7	754	2020	1	24	4	21.2125	67.1795	1.5	16.8625	Friday	1	0.65	59.0833	16.6667	1
2020-01-24	7	754	2020	1	24	4	21.2125	67.1795	1.5	16.8625	Friday	1	0.65	59.0833	16.6667	2
2020-01-25	3	755	2020	1	25	4	13.8875	86.1042	4.22917	11.2208	Saturday	1	0.925	35.5417	28.5833	1
2020-01-25	3	755	2020	1	25	4	13.8875	86.1042	4.22917	11.2208	Saturday	1	0.925	35.5417	28.5833	2
2020-01-26	9	756	2020	1	26	4	10.2292	65.4375	5.39583	6.15	Sunday	1	0.970833	30.9167	7.33333	1
2020-01-26	9	756	2020	1	26	4	10.2292	65.4375	5.39583	6.15	Sunday	1	0.970833	30.9167	7.33333	2
2020-01-27	5	757	2020	1	27	4	9.85	68.25	5.85417	2.48333	Monday	1	0.783333	48.8333	8.75	1
2020-01-27	5	757	2020	1	27	4	9.85	68.25	5.85417	2.48333	Monday	1	0.783333	48.8333	8.75	2
2020-01-28	7	758	2020	1	28	4	10.725	78	5.23913	1.6625	Tuesday	1	0.678261	59.5652	12.875	1
2020-01-28	7	758	2020	1	28	4	10.725	78	5.23913	1.6625	Tuesday	1	0.678261	59.5652	12.875	2
2020-01-29	4	759	2020	1	29	4	11.6208	60.9792	4.58333	0.525	Wednesday	1	0.7875	69.25	22.2917	1
2020-01-29	4	759	2020	1	29	4	11.6208	60.9792	4.58333	0.525	Wednesday	1	0.7875	69.25	22.2917	2
2020-01-30	6	760	2020	1	30	4	11.8	77.5625	4.60417	-1.42917	Thursday	1	0.620833	83.6667	27.4167	1
2020-01-30	6	760	2020	1	30	4	11.8	77.5625	4.60417	-1.42917	Thursday	1	0.620833	83.6667	27.4167	2
2020-01-31	3	761	2020	1	31	4	12.6458	72.3404	1.39583	-0.829167	Friday	0	0.620833	79	32.8333	1
2020-01-31	3	761	2020	1	31	4	12.6458	72.3404	1.39583	-0.829167	Friday	0	0.620833	79	32.8333	2
2020-02-01	4	762	2020	2	1	4	15.075	84.5417	1.5625	5.34167	Saturday	0	0.675	69.5833	39.75	1
2020-02-01	4	762	2020	2	1	4	15.075	84.5417	1.5625	5.34167	Saturday	0	0.675	69.5833	39.75	2
2020-02-02	3	763	2020	2	2	4	16.1333	68.766	1.79167	9.1875	Sunday	0	0.666667	81.0833	37.4167	1
2020-02-02	3	763	2020	2	2	4	16.1333	68.766	1.79167	9.1875	Sunday	0	0.666667	81.0833	37.4167	2
2020-02-03	7	764	2020	2	3	4	13.5333	63.375	2.54167	11.3583	Monday	0	0.733333	45.2083	41.7917	1
2020-02-03	7	764	2020	2	3	4	13.5333	63.375	2.54167	11.3583	Monday	0	0.733333	45.2083	41.7917	2
2020-02-04	6	765	2020	2	4	4	13.8826	78.5745	2.29167	11.3739	Tuesday	0	0.704167	33.4167	5.08696	1
2020-02-04	6	765	2020	2	4	4	13.8826	78.5745	2.29167	11.3739	Tuesday	0	0.704167	33.4167	5.08696	2
2020-02-05	5	766	2020	2	5	4	15.7542	63.1458	1.375	12.3375	Wednesday	0	0.726087	21.9167	12.75	1
2020-02-05	5	766	2020	2	5	4	15.7542	63.1458	1.375	12.3375	Wednesday	0	0.726087	21.9167	12.75	2
2020-02-06	3	767	2020	2	6	4	16.7125	75.6458	1.78261	13.2583	Thursday	0	0.629167	61.4167	17.5	1
2020-02-06	3	767	2020	2	6	4	16.7125	75.6458	1.78261	13.2583	Thursday	0	0.629167	61.4167	17.5	2
2020-02-07	2	768	2020	2	7	4	16.0167	77.3095	2.66667	11.8958	Friday	0	0.708333	28.9583	16.9583	1
2020-02-07	2	768	2020	2	7	4	16.0167	77.3095	2.66667	11.8958	Friday	0	0.708333	28.9583	16.9583	2
2020-02-08	1	769	2020	2	8	4	15.1792	83.875	4.23404	8.3	Saturday	0	0.704167	41.625	9.875	1
2020-02-08	1	769	2020	2	8	4	15.1792	83.875	4.23404	8.3	Saturday	0	0.704167	41.625	9.875	2
2020-02-09	4	770	2020	2	9	4	14.2875	83.5208	3.80435	7.30833	Sunday	0	0.670833	53.9583	17	1
2020-02-09	4	770	2020	2	9	4	14.2875	83.5208	3.80435	7.30833	Sunday	0	0.670833	53.9583	17	2
2020-02-10	4	771	2020	2	10	4	14.9208	79.7083	1.41667	9.36667	Monday	0	0.716667	36.4167	24.5417	1
2020-02-10	4	771	2020	2	10	4	14.9208	79.7083	1.41667	9.36667	Monday	0	0.716667	36.4167	24.5417	2
2020-02-11	7	772	2020	2	11	4	16.2667	74.3333	1.16667	13.5958	Tuesday	0	0.8375	18.0833	37.5833	1
2020-02-11	7	772	2020	2	11	4	16.2667	74.3333	1.16667	13.5958	Tuesday	0	0.8375	18.0833	37.5833	2
2020-02-12	3	773	2020	2	12	4	18.1792	71.6042	0.659574	16.4542	Wednesday	0	0.913043	25.5	37.875	1
2020-02-12	3	773	2020	2	12	4	18.1792	71.6042	0.659574	16.4542	Wednesday	0	0.913043	25.5	37.875	2
2020-02-13	0	774	2020	2	13	4	19.8	76.6222	2.02083	17.1083	Thursday	0	0.854167	21.25	24.6667	1
2020-02-13	0	774	2020	2	13	4	19.8	76.6222	2.02083	17.1083	Thursday	0	0.854167	21.25	24.6667	2
2020-02-14	3	775	2020	2	14	4	20.6458	62.9756	1.82222	19.1542	Friday	0	0.7375	14.875	12.625	1
2020-02-14	3	775	2020	2	14	4	20.6458	62.9756	1.82222	19.1542	Friday	0	0.7375	14.875	12.625	2
2020-02-15	2	776	2020	2	15	4	15.3	68.625	3.91667	13.225	Saturday	0	0.8	42.8235	15.1176	1
2020-02-15	2	776	2020	2	15	4	15.3	68.625	3.91667	13.225	Saturday	0	0.8	42.8235	15.1176	2
2020-02-16	3	777	2020	2	16	4	9.275	76.625	7.02083	2.97083	Sunday	0	0.8125	44.75	3.70833	1
2020-02-16	3	777	2020	2	16	4	9.275	76.625	7.02083	2.97083	Sunday	0	0.8125	44.75	3.70833	2
2020-02-17	1	778	2020	2	17	4	11.45	73.9167	5.5625	-0.270833	Monday	0	0.6625	67.9167	13.3333	1
2020-02-17	1	778	2020	2	17	4	11.45	73.9167	5.5625	-0.270833	Monday	0	0.6625	67.9167	13.3333	2
2020-02-18	3	779	2020	2	18	4	12.425	76.0208	2.125	0.829167	Tuesday	0	0.608333	62.625	16.6667	1
2020-02-18	3	779	2020	2	18	4	12.425	76.0208	2.125	0.829167	Tuesday	0	0.608333	62.625	16.6667	2
2020-02-19	4	780	2020	2	19	4	16.2417	57.9348	1.39583	8.4375	Wednesday	0	0.743478	44.087	35.4583	1
2020-02-19	4	780	2020	2	19	4	16.2417	57.9348	1.39583	8.4375	Wednesday	0	0.743478	44.087	35.4583	2
2020-02-20	4	781	2020	2	20	4	17.6625	66.3913	1.375	11.0667	Thursday	0	0.704167	46.6667	39.125	1
2020-02-20	4	781	2020	2	20	4	17.6625	66.3913	1.375	11.0667	Thursday	0	0.704167	46.6667	39.125	2
2020-02-21	2	782	2020	2	21	4	18.8083	70.5263	1.20833	11.7083	Friday	0	0.6875	59.7083	29.7083	1
2020-02-21	2	782	2020	2	21	4	18.8083	70.5263	1.20833	11.7083	Friday	0	0.6875	59.7083	29.7083	2
2020-02-22	5	783	2020	2	22	4	20.5083	77.75	1.43182	13.1917	Saturday	0	0.804167	65.8333	42.7917	1
2020-02-22	5	783	2020	2	22	4	20.5083	77.75	1.43182	13.1917	Saturday	0	0.804167	65.8333	42.7917	2
2020-02-23	2	784	2020	2	23	4	20.5042	71.5417	1.20833	14.1458	Sunday	0	0.7	75.5833	37.375	1
2020-02-23	2	784	2020	2	23	4	20.5042	71.5417	1.20833	14.1458	Sunday	0	0.7	75.5833	37.375	2
2020-02-24	4	785	2020	2	24	4	21.8292	80.75	2.41667	15.0833	Monday	0	0.6625	70.9167	25.2917	1
2020-02-24	4	785	2020	2	24	4	21.8292	80.75	2.41667	15.0833	Monday	0	0.6625	70.9167	25.2917	2
2020-02-25	2	786	2020	2	25	4	22.1792	79.6667	1.44681	16.8292	Tuesday	0	0.666667	47.0833	22.0833	1
2020-02-25	2	786	2020	2	25	4	22.1792	79.6667	1.44681	16.8292	Tuesday	0	0.666667	47.0833	22.0833	2
2020-02-26	3	787	2020	2	26	4	23.2875	56.3542	1.29787	17.1292	Wednesday	0	0.791667	41.6957	24.4167	1
2020-02-26	3	787	2020	2	26	4	23.2875	56.3542	1.29787	17.1292	Wednesday	0	0.791667	41.6957	24.4167	2
2020-02-27	4	788	2020	2	27	4	22.1333	70.4524	2	16.7542	Thursday	0	0.720833	42.5217	18.375	1
2020-02-27	4	788	2020	2	27	4	22.1333	70.4524	2	16.7542	Thursday	0	0.720833	42.5217	18.375	2
2020-02-28	2	789	2020	2	28	4	19.8583	67.25	1.85417	15.875	Friday	0	0.738889	55.1667	23.3333	1
2020-02-28	2	789	2020	2	28	4	19.8583	67.25	1.85417	15.875	Friday	0	0.738889	55.1667	23.3333	2
2020-02-29	3	790	2020	2	29	4	22.8042	80.7083	1.95833	17.1708	Saturday	0	0.816667	41.0833	30.7083	1
2020-02-29	3	790	2020	2	29	4	22.8042	80.7083	1.95833	17.1708	Saturday	0	0.816667	41.0833	30.7083	2
2020-03-01	6	791	2020	3	1	1	22.3792	65.875	2.04167	16.65	Sunday	0	0.7625	42.1667	16.75	1
2020-03-01	6	791	2020	3	1	1	22.3792	65.875	2.04167	16.65	Sunday	0	0.7625	42.1667	16.75	2
2020-03-02	5	792	2020	3	2	1	20.75	72.5	2.66667	15.1083	Monday	0	0.816667	53.1667	19.2083	1
2020-03-02	5	792	2020	3	2	1	20.75	72.5	2.66667	15.1083	Monday	0	0.816667	53.1667	19.2083	2
2020-03-03	2	793	2020	3	3	1	19.7083	81.5745	2.13333	16.3542	Tuesday	0	0.820833	55.875	21.9167	1
2020-03-03	2	793	2020	3	3	1	19.7083	81.5745	2.13333	16.3542	Tuesday	0	0.820833	55.875	21.9167	2
2020-03-04	2	794	2020	3	4	1	14.9375	65.375	3.38298	13.0208	Wednesday	0	0.813043	27.6522	10.2917	1
2020-03-04	2	794	2020	3	4	1	14.9375	65.375	3.38298	13.0208	Wednesday	0	0.813043	27.6522	10.2917	2
2020-03-05	2	795	2020	3	5	1	17.4458	71.5745	1.91667	12.8375	Thursday	0	0.8	30.2917	10.0833	1
2020-03-05	2	795	2020	3	5	1	17.4458	71.5745	1.91667	12.8375	Thursday	0	0.8	30.2917	10.0833	2
2020-03-06	4	796	2020	3	6	1	19.4875	68.3429	1.95745	15.3667	Friday	0	0.705556	46.3889	22.2222	1
2020-03-06	4	796	2020	3	6	1	19.4875	68.3429	1.95745	15.3667	Friday	0	0.705556	46.3889	22.2222	2
2020-03-07	2	797	2020	3	7	1	21.1917	58.5625	1	18.6708	Saturday	0	0.658333	23.2917	21.0417	1
2020-03-07	2	797	2020	3	7	1	21.1917	58.5625	1	18.6708	Saturday	0	0.658333	23.2917	21.0417	2
2020-03-08	2	798	2020	3	8	1	23.4125	65.5	4.02083	19.4292	Sunday	0	0.629167	27.125	12.9583	1
2020-03-08	2	798	2020	3	8	1	23.4125	65.5	4.02083	19.4292	Sunday	0	0.629167	27.125	12.9583	2
2020-03-09	3	799	2020	3	9	1	22.1542	62.7708	4.08696	18.3833	Monday	0	0.625	15.0833	11.3333	1
2020-03-09	3	799	2020	3	9	1	22.1542	62.7708	4.08696	18.3833	Monday	0	0.625	15.0833	11.3333	2
2020-03-10	0	800	2020	3	10	1	18.9792	67.4583	6.46809	9.6375	Tuesday	0	0.816667	71.1667	13.3333	1
2020-03-10	0	800	2020	3	10	1	18.9792	67.4583	6.46809	9.6375	Tuesday	0	0.816667	71.1667	13.3333	2
2020-03-11	2	801	2020	3	11	1	17.38	60.7292	2.25532	11.135	Wednesday	0	0.845455	53.1304	37.2174	1
2020-03-11	2	801	2020	3	11	1	17.38	60.7292	2.25532	11.135	Wednesday	0	0.845455	53.1304	37.2174	2
2020-03-12	6	802	2020	3	12	1	20.3542	82.0851	0.978723	17.4792	Thursday	0	0.870833	20.3333	30.125	1
2020-03-12	6	802	2020	3	12	1	20.3542	82.0851	0.978723	17.4792	Thursday	0	0.870833	20.3333	30.125	2
2020-03-13	5	803	2020	3	13	1	20.0905	68.9583	2.84091	17.1095	Friday	0	0.904167	9.75	26.2083	1
2020-03-13	5	803	2020	3	13	1	20.0905	68.9583	2.84091	17.1095	Friday	0	0.904167	9.75	26.2083	2
2020-03-14	0	804	2020	3	14	1	19.23	54.8333	5.54167	10.63	Saturday	0	0.829167	77.5417	22.625	1
2020-03-14	0	804	2020	3	14	1	19.23	54.8333	5.54167	10.63	Saturday	0	0.829167	77.5417	22.625	2
2020-03-15	1	805	2020	3	15	1	20.0667	72.6458	1.97917	10.3333	Sunday	0	0.8	81.5	39.9167	1
2020-03-15	1	805	2020	3	15	1	20.0667	72.6458	1.97917	10.3333	Sunday	0	0.8	81.5	39.9167	2
2020-03-16	2	806	2020	3	16	1	21.1083	62.6875	2.33333	12.6292	Monday	0	0.758333	85.6667	30.75	1
2020-03-16	2	806	2020	3	16	1	21.1083	62.6875	2.33333	12.6292	Monday	0	0.758333	85.6667	30.75	2
2020-03-17	3	807	2020	3	17	1	20.0417	86.1042	2.06667	17.3333	Tuesday	0	0.730435	52.125	26.2083	1
2020-03-17	3	807	2020	3	17	1	20.0417	86.1042	2.06667	17.3333	Tuesday	0	0.730435	52.125	26.2083	2
2020-03-18	1	808	2020	3	18	1	20.2458	67.1277	1.85417	18.1583	Wednesday	0	0.913636	20.7273	39.6818	1
2020-03-18	1	808	2020	3	18	1	20.2458	67.1277	1.85417	18.1583	Wednesday	0	0.913636	20.7273	39.6818	2
2020-03-19	3	809	2020	3	19	1	19.0583	74.0625	1.6875	17.6625	Thursday	0	0.966667	20.2083	26.0833	1
2020-03-19	3	809	2020	3	19	1	19.0583	74.0625	1.6875	17.6625	Thursday	0	0.966667	20.2083	26.0833	2
2020-03-20	4	810	2020	3	20	1	20.3042	70.375	1.16667	18.775	Friday	0	1.0087	10.5909	34.1667	1
2020-03-20	4	810	2020	3	20	1	20.3042	70.375	1.16667	18.775	Friday	0	1.0087	10.5909	34.1667	2
2020-03-21	1	811	2020	3	21	1	22.8375	67.1667	2.70833	20.5542	Saturday	0	0.904167	12.9583	25.9583	1
2020-03-21	1	811	2020	3	21	1	22.8375	67.1667	2.70833	20.5542	Saturday	0	0.904167	12.9583	25.9583	2
2020-03-22	2	812	2020	3	22	1	24.8333	90.9792	1.72917	19.9667	Sunday	0	0.825	38.3333	21.4167	1
2020-03-22	2	812	2020	3	22	1	24.8333	90.9792	1.72917	19.9667	Sunday	0	0.825	38.3333	21.4167	2
2020-03-23	5	813	2020	3	23	1	25.1083	65.6042	1.85417	20.0625	Monday	0	0.833333	48.9167	22.625	1
2020-03-23	5	813	2020	3	23	1	25.1083	65.6042	1.85417	20.0625	Monday	0	0.833333	48.9167	22.625	2
2020-03-24	4	814	2020	3	24	1	24.2583	86.3333	2.29167	18.0833	Tuesday	0	0.795652	57.3043	27.6087	1
2020-03-24	4	814	2020	3	24	1	24.2583	86.3333	2.29167	18.0833	Tuesday	0	0.795652	57.3043	27.6087	2
2020-03-25	3	815	2020	3	25	1	23.8417	69.8958	2.9375	18.3708	Wednesday	0	0.658333	69.0417	19.0417	1
2020-03-25	3	815	2020	3	25	1	23.8417	69.8958	2.9375	18.3708	Wednesday	0	0.658333	69.0417	19.0417	2
2020-03-26	2	816	2020	3	26	1	23.6625	67.1064	2.57447	19.9542	Thursday	0	0.583333	23.0417	17.875	1
2020-03-26	2	816	2020	3	26	1	23.6625	67.1064	2.57447	19.9542	Thursday	0	0.583333	23.0417	17.875	2
2020-03-27	1	817	2020	3	27	1	21.7792	71.8085	3.02083	19.3125	Friday	0	0.683333	19.125	18.2083	1
2020-03-27	1	817	2020	3	27	1	21.7792	71.8085	3.02083	19.3125	Friday	0	0.683333	19.125	18.2083	2
2020-03-28	3	818	2020	3	28	1	18.225	75.9583	4.75	13.075	Saturday	0	0.7	32.7083	11.875	1
2020-03-28	3	818	2020	3	28	1	18.225	75.9583	4.75	13.075	Saturday	0	0.7	32.7083	11.875	2
2020-03-29	0	819	2020	3	29	1	16.8	80.0625	2.08333	14.375	Sunday	0	0.7875	20.0833	24	1
2020-03-29	0	819	2020	3	29	1	16.8	80.0625	2.08333	14.375	Sunday	0	0.7875	20.0833	24	2
2020-03-30	4	820	2020	3	30	1	13.7542	70.9167	2.64583	12.4	Monday	0	0.729167	8.54167	6.91667	1
2020-03-30	4	820	2020	3	30	1	13.7542	70.9167	2.64583	12.4	Monday	0	0.729167	8.54167	6.91667	2
2020-03-31	1	821	2020	3	31	1	14.5478	88.75	2.375	12.7913	Tuesday	0	0.708333	5.375	9.125	1
2020-03-31	1	821	2020	3	31	1	14.5478	88.75	2.375	12.7913	Tuesday	0	0.708333	5.375	9.125	2
2020-04-01	3	822	2020	4	1	1	15.3292	66.4375	2.125	12.825	Wednesday	0	0.720833	7.13636	12.3333	1
2020-04-01	3	822	2020	4	1	1	15.3292	66.4375	2.125	12.825	Wednesday	0	0.720833	7.13636	12.3333	2
2020-04-02	2	823	2020	4	2	1	16.9917	67.625	1.66667	15.0333	Thursday	0	0.883333	6.04167	23.2917	1
2020-04-02	2	823	2020	4	2	1	16.9917	67.625	1.66667	15.0333	Thursday	0	0.883333	6.04167	23.2917	2
2020-04-03	2	824	2020	4	3	1	16.7792	48.4167	2.64583	15.4917	Friday	0	0.958333	5.20833	18.3333	1
2020-04-03	2	824	2020	4	3	1	16.7792	48.4167	2.64583	15.4917	Friday	0	0.958333	5.20833	18.3333	2
2020-04-04	2	825	2020	4	4	1	17.0625	71.6458	3.14583	14	Saturday	1	0.866667	19.9167	8.58333	1
2020-04-04	2	825	2020	4	4	1	17.0625	71.6458	3.14583	14	Saturday	1	0.866667	19.9167	8.58333	2
2020-04-05	4	826	2020	4	5	1	15.6042	82.875	2.46809	13.6875	Sunday	1	0.783333	28.0833	10.2083	1
2020-04-05	4	826	2020	4	5	1	15.6042	82.875	2.46809	13.6875	Sunday	1	0.783333	28.0833	10.2083	2
2020-04-06	2	827	2020	4	6	1	15.0773	82.1458	1.75	14	Monday	1	0.846154	9.53846	8.15385	1
2020-04-06	2	827	2020	4	6	1	15.0773	82.1458	1.75	14	Monday	1	0.846154	9.53846	8.15385	2
2020-04-07	0	828	2020	4	7	1	18.7478	85.3333	1.06383	13.9783	Tuesday	0	0.795833	22.9167	17.0833	1
2020-04-07	0	828	2020	4	7	1	18.7478	85.3333	1.06383	13.9783	Tuesday	0	0.795833	22.9167	17.0833	2
2020-04-08	2	829	2020	4	8	1	21.0391	74.25	0.979167	14.7957	Wednesday	0	1.0087	43.4348	47.4583	1
2020-04-08	2	829	2020	4	8	1	21.0391	74.25	0.979167	14.7957	Wednesday	0	1.0087	43.4348	47.4583	2
2020-04-09	4	830	2020	4	9	1	22.75	65.8333	1.39583	15.2167	Thursday	0	0.943478	92.3043	43.3478	1
2020-04-09	4	830	2020	4	9	1	22.75	65.8333	1.39583	15.2167	Thursday	0	0.943478	92.3043	43.3478	2
2020-04-10	3	831	2020	4	10	1	22.9333	53.3125	2.3125	13.0375	Friday	0	0.720833	70.9583	27.625	1
2020-04-10	3	831	2020	4	10	1	22.9333	53.3125	2.3125	13.0375	Friday	0	0.720833	70.9583	27.625	2
2020-04-11	2	832	2020	4	11	1	18.7625	65.4167	2.75	15.15	Saturday	0	0.854167	17.0417	30.375	1
2020-04-11	2	832	2020	4	11	1	18.7625	65.4167	2.75	15.15	Saturday	0	0.854167	17.0417	30.375	2
2020-04-12	2	833	2020	4	12	1	17.625	76.0833	5.79167	3.82917	Sunday	0	0.704167	71.375	10.2083	1
2020-04-12	2	833	2020	4	12	1	17.625	76.0833	5.79167	3.82917	Sunday	0	0.704167	71.375	10.2083	2
2020-04-13	2	834	2020	4	13	1	19.2292	67.6458	2.4375	5.03333	Monday	0	0.554167	78.2917	24.7083	1
2020-04-13	2	834	2020	4	13	1	19.2292	67.6458	2.4375	5.03333	Monday	0	0.554167	78.2917	24.7083	2
2020-04-14	5	835	2020	4	14	1	17.7625	83.6087	1.25	10.3042	Tuesday	0	0.879167	51.875	65.1667	1
2020-04-14	5	835	2020	4	14	1	17.7625	83.6087	1.25	10.3042	Tuesday	0	0.879167	51.875	65.1667	2
2020-04-15	4	836	2020	4	15	1	21.4125	80.8333	1.5	12.3208	Wednesday	0	0.929167	111.565	74.0417	1
2020-04-15	4	836	2020	4	15	1	21.4125	80.8333	1.5	12.3208	Wednesday	0	0.929167	111.565	74.0417	2
2020-04-16	4	837	2020	4	16	1	23.2417	60.7083	2.47917	16.4208	Thursday	0	0.795833	85.375	33.25	1
2020-04-16	4	837	2020	4	16	1	23.2417	60.7083	2.47917	16.4208	Thursday	0	0.795833	85.375	33.25	2
2020-04-17	1	838	2020	4	17	1	24.0583	71.2292	1.85417	17.9417	Friday	0	0.7625	54.5	24.125	1
2020-04-17	1	838	2020	4	17	1	24.0583	71.2292	1.85417	17.9417	Friday	0	0.7625	54.5	24.125	2
2020-04-18	4	839	2020	4	18	1	24.5458	69.125	2.22917	19.2042	Saturday	0	0.716667	27.2083	23.1667	1
2020-04-18	4	839	2020	4	18	1	24.5458	69.125	2.22917	19.2042	Saturday	0	0.716667	27.2083	23.1667	2
2020-04-19	5	840	2020	4	19	1	26.7458	71.6875	1.875	21.5	Sunday	0	0.770833	29.7083	23.9167	1
2020-04-19	5	840	2020	4	19	1	26.7458	71.6875	1.875	21.5	Sunday	0	0.770833	29.7083	23.9167	2
2020-04-20	1	841	2020	4	20	1	27.2792	67.1458	2.66667	21.5958	Monday	0	0.791667	35.9583	20.9167	1
2020-04-20	1	841	2020	4	20	1	27.2792	67.1458	2.66667	21.5958	Monday	0	0.791667	35.9583	20.9167	2
2020-04-21	5	842	2020	4	21	1	25.4792	84	2.95833	21.1458	Tuesday	0	0.7	12.2917	13.8333	1
2020-04-21	5	842	2020	4	21	1	25.4792	84	2.95833	21.1458	Tuesday	0	0.7	12.2917	13.8333	2
2020-04-22	2	843	2020	4	22	1	17.6708	79.5625	4.02083	15.875	Wednesday	0	0.883333	21.4583	12.0833	1
2020-04-22	2	843	2020	4	22	1	17.6708	79.5625	4.02083	15.875	Wednesday	0	0.883333	21.4583	12.0833	2
2020-04-23	4	844	2020	4	23	1	18.0292	61.8542	3.20833	14.0542	Thursday	0	0.916667	31.5	10	1
2020-04-23	4	844	2020	4	23	1	18.0292	61.8542	3.20833	14.0542	Thursday	0	0.916667	31.5	10	2
2020-04-24	1	845	2020	4	24	1	16.5348	58.8936	3.6875	13.6087	Friday	0	0.716667	47.0417	16.6667	1
2020-04-24	1	845	2020	4	24	1	16.5348	58.8936	3.6875	13.6087	Friday	0	0.716667	47.0417	16.6667	2
2020-04-25	3	846	2020	4	25	1	21.1375	61.7708	1.2766	15.0042	Saturday	0	0.791304	51.7826	31.1739	1
2020-04-25	3	846	2020	4	25	1	21.1375	61.7708	1.2766	15.0042	Saturday	0	0.791304	51.7826	31.1739	2
2020-04-26	3	847	2020	4	26	1	22.9833	70.2391	2.0625	14.7958	Sunday	0	0.9125	75.2917	36.9583	1
2020-04-26	3	847	2020	4	26	1	22.9833	70.2391	2.0625	14.7958	Sunday	0	0.9125	75.2917	36.9583	2
2020-04-27	3	848	2020	4	27	1	24.7083	61.125	1.29167	14.3125	Monday	0	0.783333	92.375	37.2083	1
2020-04-27	3	848	2020	4	27	1	24.7083	61.125	1.29167	14.3125	Monday	0	0.783333	92.375	37.2083	2
2020-04-28	2	849	2020	4	28	1	25.8208	76.7083	1.875	15.2208	Tuesday	0	0.834783	115.478	38.6087	1
2020-04-28	2	849	2020	4	28	1	25.8208	76.7083	1.875	15.2208	Tuesday	0	0.834783	115.478	38.6087	2
2020-04-29	2	850	2020	4	29	1	25.2958	60.1667	2.16667	16.1625	Wednesday	0	0.729167	102.043	25.625	1
2020-04-29	2	850	2020	4	29	1	25.2958	60.1667	2.16667	16.1625	Wednesday	0	0.729167	102.043	25.625	2
2020-04-30	1	851	2020	4	30	1	26.3417	71.4792	2.41304	15.6917	Thursday	0	0.716667	70.125	22.625	1
2020-04-30	1	851	2020	4	30	1	26.3417	71.4792	2.41304	15.6917	Thursday	0	0.716667	70.125	22.625	2
2020-05-01	6	852	2020	5	1	1	27.2417	57.5208	2.29167	20.1125	Friday	1	0.704167	51.1667	18.125	1
2020-05-01	6	852	2020	5	1	1	27.2417	57.5208	2.29167	20.1125	Friday	1	0.704167	51.1667	18.125	2
2020-05-02	4	853	2020	5	2	1	27.2417	68.4167	2.625	21.2958	Saturday	1	0.754167	47.087	19.5417	1
2020-05-02	4	853	2020	5	2	1	27.2417	68.4167	2.625	21.2958	Saturday	1	0.754167	47.087	19.5417	2
2020-05-03	6	854	2020	5	3	1	29.7792	76.875	2.64583	21.8167	Sunday	1	0.741667	94.3529	18.875	1
2020-05-03	6	854	2020	5	3	1	29.7792	76.875	2.64583	21.8167	Sunday	1	0.741667	94.3529	18.875	2
2020-05-04	5	855	2020	5	4	1	29.7667	61.5833	3.4375	22.8417	Monday	1	0.717391	61.381	15.7917	1
2020-05-04	5	855	2020	5	4	1	29.7667	61.5833	3.4375	22.8417	Monday	1	0.717391	61.381	15.7917	2
2020-05-05	4	856	2020	5	5	1	29.6417	64.8333	3.78723	22.6875	Tuesday	1	0.678261	41.3913	12.125	1
2020-05-05	4	856	2020	5	5	1	29.6417	64.8333	3.78723	22.6875	Tuesday	1	0.678261	41.3913	12.125	2
2020-05-06	2	857	2020	5	6	1	29.9333	52.9348	3.84783	23.4042	Wednesday	0	0.683333	27	13.3333	1
2020-05-06	2	857	2020	5	6	1	29.9333	52.9348	3.84783	23.4042	Wednesday	0	0.683333	27	13.3333	2
2020-05-07	1	858	2020	5	7	1	29.4417	68.587	3.97917	23.9125	Thursday	0	0.6375	26.625	9.75	1
2020-05-07	1	858	2020	5	7	1	29.4417	68.587	3.97917	23.9125	Thursday	0	0.6375	26.625	9.75	2
2020-05-08	3	859	2020	5	8	1	30.1292	70.2083	4.0625	24.0708	Friday	0	0.666667	23	8.66667	1
2020-05-08	3	859	2020	5	8	1	30.1292	70.2083	4.0625	24.0708	Friday	0	0.666667	23	8.66667	2
2020-05-09	2	860	2020	5	9	1	30.3875	81.375	3.95833	24.1375	Saturday	0	0.695833	26.4167	11.9167	1
2020-05-09	2	860	2020	5	9	1	30.3875	81.375	3.95833	24.1375	Saturday	0	0.695833	26.4167	11.9167	2
2020-05-10	4	861	2020	5	10	1	25.9125	68.375	2.4375	22.9208	Sunday	0	0.770833	33.875	13.75	1
2020-05-10	4	861	2020	5	10	1	25.9125	68.375	2.4375	22.9208	Sunday	0	0.770833	33.875	13.75	2
2020-05-11	3	862	2020	5	11	1	26.5625	64.8125	1.93478	22.5167	Monday	0	0.9	50.9167	18.2083	1
2020-05-11	3	862	2020	5	11	1	26.5625	64.8125	1.93478	22.5167	Monday	0	0.9	50.9167	18.2083	2
2020-05-12	1	863	2020	5	12	1	27.0417	80.4348	3.02174	21.3833	Tuesday	0	0.9875	63.875	22.625	1
2020-05-12	1	863	2020	5	12	1	27.0417	80.4348	3.02174	21.3833	Tuesday	0	0.9875	63.875	22.625	2
2020-05-13	0	864	2020	5	13	1	27.4542	47.3125	2.6875	21.1917	Wednesday	0	1.14545	83.4545	40.8261	1
2020-05-13	0	864	2020	5	13	1	27.4542	47.3125	2.6875	21.1917	Wednesday	0	1.14545	83.4545	40.8261	2
2020-05-14	5	865	2020	5	14	1	27.1	60.7174	3.4375	22.6	Thursday	0	0.841667	83.0833	19.2917	1
2020-05-14	5	865	2020	5	14	1	27.1	60.7174	3.4375	22.6	Thursday	0	0.841667	83.0833	19.2917	2
2020-05-15	2	866	2020	5	15	1	28.575	73.2292	3.62222	23.0958	Friday	0	0.779167	45.2083	13.5833	1
2020-05-15	2	866	2020	5	15	1	28.575	73.2292	3.62222	23.0958	Friday	0	0.779167	45.2083	13.5833	2
2020-05-16	5	867	2020	5	16	1	27.0208	70.9583	2.20833	22.2042	Saturday	0	0.611111	73	14.1111	1
2020-05-16	5	867	2020	5	16	1	27.0208	70.9583	2.20833	22.2042	Saturday	0	0.611111	73	14.1111	2
2020-05-17	4	868	2020	5	17	1	26.7958	78.8542	1.79167	22.25	Sunday	0	0.595833	73.7083	18.5	1
2020-05-17	4	868	2020	5	17	1	26.7958	78.8542	1.79167	22.25	Sunday	0	0.595833	73.7083	18.5	2
2020-05-18	3	869	2020	5	18	1	26.775	59.2917	1.58333	22.475	Monday	0	0.670833	44.1364	17.75	1
2020-05-18	3	869	2020	5	18	1	26.775	59.2917	1.58333	22.475	Monday	0	0.670833	44.1364	17.75	2
2020-05-19	4	870	2020	5	19	1	28.0375	70.383	2.17021	22.5875	Tuesday	0	0.733333	106.417	21.5	1
2020-05-19	4	870	2020	5	19	1	28.0375	70.383	2.17021	22.5875	Tuesday	0	0.733333	106.417	21.5	2
2020-05-20	2	871	2020	5	20	1	27.3042	35	3.06383	24.375	Wednesday	0	0.782609	57.9167	16.9167	1
2020-05-20	2	871	2020	5	20	1	27.3042	35	3.06383	24.375	Wednesday	0	0.782609	57.9167	16.9167	2
2020-05-21	0	872	2020	5	21	1	27.2958	59.9787	2.1875	25.3583	Thursday	0	0.816667	36.0833	12.25	1
2020-05-21	0	872	2020	5	21	1	27.2958	59.9787	2.1875	25.3583	Thursday	0	0.816667	36.0833	12.25	2
2020-05-22	2	873	2020	5	22	1	26.9125	76.2292	3.27083	22.7125	Friday	0	0.8875	43.625	10.3333	1
2020-05-22	2	873	2020	5	22	1	26.9125	76.2292	3.27083	22.7125	Friday	0	0.8875	43.625	10.3333	2
2020-05-23	3	874	2020	5	23	1	27.1	72.5	1.77083	22.6375	Saturday	0	0.9375	53.625	20.8333	1
2020-05-23	3	874	2020	5	23	1	27.1	72.5	1.77083	22.6375	Saturday	0	0.9375	53.625	20.8333	2
2020-05-24	2	875	2020	5	24	1	27.6833	83.3958	1.70833	22.7958	Sunday	0	0.904167	76.0833	23.4167	1
2020-05-24	2	875	2020	5	24	1	27.6833	83.3958	1.70833	22.7958	Sunday	0	0.904167	76.0833	23.4167	2
2020-05-25	3	876	2020	5	25	1	27.6083	54.6875	2.625	24.6	Monday	0	0.8125	48.5417	12.7083	1
2020-05-25	3	876	2020	5	25	1	27.6083	54.6875	2.625	24.6	Monday	0	0.8125	48.5417	12.7083	2
2020-05-26	3	877	2020	5	26	1	28.9458	76.2292	2.56522	23.5667	Tuesday	0	0.841667	56.7083	15.7917	1
2020-05-26	3	877	2020	5	26	1	28.9458	76.2292	2.56522	23.5667	Tuesday	0	0.841667	56.7083	15.7917	2
2020-05-27	1	878	2020	5	27	1	25.7958	37.4583	3.0625	20.8625	Wednesday	0	0.973913	39.1739	18.4583	1
2020-05-27	1	878	2020	5	27	1	25.7958	37.4583	3.0625	20.8625	Wednesday	0	0.973913	39.1739	18.4583	2
2020-05-28	4	879	2020	5	28	1	27.3333	57.7083	1.4375	22.6667	Thursday	0	0.9375	38.5417	33.25	1
2020-05-28	4	879	2020	5	28	1	27.3333	57.7083	1.4375	22.6667	Thursday	0	0.9375	38.5417	33.25	2
2020-05-29	1	880	2020	5	29	1	27.5417	71.7292	2.60417	24.3792	Friday	0	0.766667	33.0417	22.1667	1
2020-05-29	1	880	2020	5	29	1	27.5417	71.7292	2.60417	24.3792	Friday	0	0.766667	33.0417	22.1667	2
2020-05-30	2	881	2020	5	30	1	27.1292	72.7708	2.54167	24.5167	Saturday	0	0.629167	25.9583	10.375	1
2020-05-30	2	881	2020	5	30	1	27.1292	72.7708	2.54167	24.5167	Saturday	0	0.629167	25.9583	10.375	2
2020-05-31	3	882	2020	5	31	1	25.7042	78.1042	2.39583	24.075	Sunday	0	0.783333	21.2083	15.5833	1
2020-05-31	3	882	2020	5	31	1	25.7042	78.1042	2.39583	24.075	Sunday	0	0.783333	21.2083	15.5833	2
2020-06-01	3	883	2020	6	1	2	25.6583	58.1458	2.25	23.8625	Monday	0	0.870833	13.75	17.5	1
2020-06-01	3	883	2020	6	1	2	25.6583	58.1458	2.25	23.8625	Monday	0	0.870833	13.75	17.5	2
2020-06-02	5	884	2020	6	2	2	26.3125	83	2.52083	23.5708	Tuesday	0	0.775	11.8333	14.2917	1
2020-06-02	5	884	2020	6	2	2	26.3125	83	2.52083	23.5708	Tuesday	0	0.775	11.8333	14.2917	2
2020-06-03	4	885	2020	6	3	2	26.575	48.875	2.54167	23.725	Wednesday	0	0.758333	24.7917	15.2083	1
2020-06-03	4	885	2020	6	3	2	26.575	48.875	2.54167	23.725	Wednesday	0	0.758333	24.7917	15.2083	2
2020-06-04	3	886	2020	6	4	2	29.8182	69.3542	3.53191	24.2682	Thursday	0	0.634783	25.2609	11.4583	1
2020-06-04	3	886	2020	6	4	2	29.8182	69.3542	3.53191	24.2682	Thursday	0	0.634783	25.2609	11.4583	2
2020-06-05	3	887	2020	6	5	2	26.6458	76.0625	3.25532	23.475	Friday	0	0.679167	30.9583	12.3333	1
2020-06-05	3	887	2020	6	5	2	26.6458	76.0625	3.25532	23.475	Friday	0	0.679167	30.9583	12.3333	2
2020-06-06	3	888	2020	6	6	2	25.575	71.6458	2.41667	24.0417	Saturday	0	0.790909	16.6522	17.6957	1
2020-06-06	3	888	2020	6	6	2	25.575	71.6458	2.41667	24.0417	Saturday	0	0.790909	16.6522	17.6957	2
2020-06-07	3	889	2020	6	7	2	26.2	71.0833	2.35417	24.4792	Sunday	0	0.994444	9.11111	23.5	1
2020-06-07	3	889	2020	6	7	2	26.2	71.0833	2.35417	24.4792	Sunday	0	0.994444	9.11111	23.5	2
2020-06-08	2	890	2020	6	8	2	25.975	88.375	2.85106	24.4333	Monday	0	0.966667	13.3333	15.625	1
2020-06-08	2	890	2020	6	8	2	25.975	88.375	2.85106	24.4333	Monday	0	0.966667	13.3333	15.625	2
2020-06-09	6	891	2020	6	9	2	25.7	79.875	2.17391	23.8458	Tuesday	0	0.847826	15.913	11.8261	1
2020-06-09	6	891	2020	6	9	2	25.7	79.875	2.17391	23.8458	Tuesday	0	0.847826	15.913	11.8261	2
2020-06-10	0	892	2020	6	10	2	27.8833	57.8333	1.875	24.5042	Wednesday	0	0.843478	36.9583	15.3333	1
2020-06-10	0	892	2020	6	10	2	27.8833	57.8333	1.875	24.5042	Wednesday	0	0.843478	36.9583	15.3333	2
2020-06-11	5	893	2020	6	11	2	29.9917	66.6957	2.64583	23.8792	Thursday	0	0.629167	44.8333	8.875	1
2020-06-11	5	893	2020	6	11	2	29.9917	66.6957	2.64583	23.8792	Thursday	0	0.629167	44.8333	8.875	2
2020-06-12	2	894	2020	6	12	2	30.5667	71.7292	2.35556	23.3083	Friday	0	0.6125	47.2083	10.0417	1
2020-06-12	2	894	2020	6	12	2	30.5667	71.7292	2.35556	23.3083	Friday	0	0.6125	47.2083	10.0417	2
2020-06-13	2	895	2020	6	13	2	29.675	71.9375	2.85417	24.125	Saturday	0	0.65	38	13.75	1
2020-06-13	2	895	2020	6	13	2	29.675	71.9375	2.85417	24.125	Saturday	0	0.65	38	13.75	2
2020-06-14	2	896	2020	6	14	2	27.0042	68.2083	3.38298	23.575	Sunday	0	0.591667	38.1667	6.41667	1
2020-06-14	2	896	2020	6	14	2	27.0042	68.2083	3.38298	23.575	Sunday	0	0.591667	38.1667	6.41667	2
2020-06-15	4	897	2020	6	15	2	28.4042	80.0417	3.08333	24.0625	Monday	0	0.65	30.9167	9.54167	1
2020-06-15	4	897	2020	6	15	2	28.4042	80.0417	3.08333	24.0625	Monday	0	0.65	30.9167	9.54167	2
2020-06-16	4	898	2020	6	16	2	28.2042	85.8542	3.39583	23.6125	Tuesday	0	0.641667	24.2917	7.95833	1
2020-06-16	4	898	2020	6	16	2	28.2042	85.8542	3.39583	23.6125	Tuesday	0	0.641667	24.2917	7.95833	2
2020-06-17	4	899	2020	6	17	2	26.9792	77.4375	2.48889	23.7708	Wednesday	0	0.63913	23.1364	7.58333	1
2020-06-17	4	899	2020	6	17	2	26.9792	77.4375	2.48889	23.7708	Wednesday	0	0.63913	23.1364	7.58333	2
2020-06-18	4	900	2020	6	18	2	29.3	61.75	2.83333	24.2458	Thursday	0	0.6	32.0833	9.79167	1
2020-06-18	4	900	2020	6	18	2	29.3	61.75	2.83333	24.2458	Thursday	0	0.6	32.0833	9.79167	2
2020-06-19	5	901	2020	6	19	2	29.9833	72.2917	2.34043	23.8833	Friday	0	0.625	40.5833	10.25	1
2020-06-19	5	901	2020	6	19	2	29.9833	72.2917	2.34043	23.8833	Friday	0	0.625	40.5833	10.25	2
2020-06-20	5	902	2020	6	20	2	30.6458	72.4375	2.39583	23.2042	Saturday	0	0.625	43.75	11.875	1
2020-06-20	5	902	2020	6	20	2	30.6458	72.4375	2.39583	23.2042	Saturday	0	0.625	43.75	11.875	2
2020-06-21	9	903	2020	6	21	2	31.1917	75.4375	3.70833	23.6958	Sunday	0	0.595833	39.7917	10.7917	1
2020-06-21	9	903	2020	6	21	2	31.1917	75.4375	3.70833	23.6958	Sunday	0	0.595833	39.7917	10.7917	2
2020-06-22	2	904	2020	6	22	2	31.375	78.75	3.97917	24.4167	Monday	0	0.616667	43.5417	10.2083	1
2020-06-22	2	904	2020	6	22	2	31.375	78.75	3.97917	24.4167	Monday	0	0.616667	43.5417	10.2083	2
2020-06-23	4	905	2020	6	23	2	31.7	83.4167	3.72917	23.9083	Tuesday	0	0.620833	46.875	12.5417	1
2020-06-23	4	905	2020	6	23	2	31.7	83.4167	3.72917	23.9083	Tuesday	0	0.620833	46.875	12.5417	2
2020-06-24	2	906	2020	6	24	2	31.525	84.5	3.97917	24.1667	Wednesday	0	0.691304	47	12.5417	1
2020-06-24	2	906	2020	6	24	2	31.525	84.5	3.97917	24.1667	Wednesday	0	0.691304	47	12.5417	2
2020-06-25	6	907	2020	6	25	2	27.6042	59.9583	4.44681	24.0042	Thursday	1	0.720833	32.7083	11.125	1
2020-06-25	6	907	2020	6	25	2	27.6042	59.9583	4.44681	24.0042	Thursday	1	0.720833	32.7083	11.125	2
2020-06-26	2	908	2020	6	26	2	31.0417	69.625	3.97872	23.925	Friday	1	0.733333	34.8333	8.58333	1
2020-06-26	2	908	2020	6	26	2	31.0417	69.625	3.97872	23.925	Friday	1	0.733333	34.8333	8.58333	2
2020-06-27	4	909	2020	6	27	2	30.9917	69.9375	3.5625	23.4208	Saturday	1	0.708333	32.0417	8.54167	1
2020-06-27	4	909	2020	6	27	2	30.9917	69.9375	3.5625	23.4208	Saturday	1	0.708333	32.0417	8.54167	2
2020-06-28	7	910	2020	6	28	2	30.9417	69.5208	3.41667	23.2458	Sunday	0	0.725	34.7917	8.58333	1
2020-06-28	7	910	2020	6	28	2	30.9417	69.5208	3.41667	23.2458	Sunday	0	0.725	34.7917	8.58333	2
2020-06-29	9	911	2020	6	29	2	31.1542	79.2917	2.625	23.7583	Monday	0	0.783333	56.4167	10.7083	1
2020-06-29	9	911	2020	6	29	2	31.1542	79.2917	2.625	23.7583	Monday	0	0.783333	56.4167	10.7083	2
2020-06-30	8	912	2020	6	30	2	31.6417	79.0208	2.5	23.5958	Tuesday	0	0.795833	54.0833	10.7083	1
2020-06-30	8	912	2020	6	30	2	31.6417	79.0208	2.5	23.5958	Tuesday	0	0.795833	54.0833	10.7083	2
2020-07-01	3	913	2020	7	1	2	29.4792	81.2708	2.70833	24.625	Wednesday	0	0.786957	49.8261	10	1
2020-07-01	3	913	2020	7	1	2	29.4792	81.2708	2.70833	24.625	Wednesday	0	0.786957	49.8261	10	2
2020-07-02	1	914	2020	7	2	2	29.0292	75.6667	2.85417	24.925	Thursday	0	0.658333	22.8333	8.75	1
2020-07-02	1	914	2020	7	2	2	29.0292	75.6667	2.85417	24.925	Thursday	0	0.658333	22.8333	8.75	2
2020-07-03	4	915	2020	7	3	2	27.3083	68	2.19149	24.4875	Friday	0	0.726087	20.3043	11.2174	1
2020-07-03	4	915	2020	7	3	2	27.3083	68	2.19149	24.4875	Friday	0	0.726087	20.3043	11.2174	2
2020-07-04	4	916	2020	7	4	2	27.3667	82.5625	2.17021	24.5542	Saturday	0	0.791667	16.8333	14	1
2020-07-04	4	916	2020	7	4	2	27.3667	82.5625	2.17021	24.5542	Saturday	0	0.791667	16.8333	14	2
2020-07-05	2	917	2020	7	5	2	29.2333	75	2.85106	24.3417	Sunday	0	0.754167	35.6667	11.7917	1
2020-07-05	2	917	2020	7	5	2	29.2333	75	2.85106	24.3417	Sunday	0	0.754167	35.6667	11.7917	2
2020-07-06	4	918	2020	7	6	2	30.3958	78.5	3.35417	23.925	Monday	0	0.733333	35.3333	9.91667	1
2020-07-06	4	918	2020	7	6	2	30.3958	78.5	3.35417	23.925	Monday	0	0.733333	35.3333	9.91667	2
2020-07-07	8	919	2020	7	7	2	30.9167	76.5106	3.27083	23.775	Tuesday	0	0.741667	34.9167	10.4583	1
2020-07-07	8	919	2020	7	7	2	30.9167	76.5106	3.27083	23.775	Tuesday	0	0.741667	34.9167	10.4583	2
2020-07-08	3	920	2020	7	8	2	30.8542	76.5	4.22917	24.15	Wednesday	0	0.743478	31.9565	14.913	1
2020-07-08	3	920	2020	7	8	2	30.8542	76.5	4.22917	24.15	Wednesday	0	0.743478	31.9565	14.913	2
2020-07-09	2	921	2020	7	9	2	31.35	79.375	4.91489	23.9167	Thursday	0	0.741667	36.9167	13.875	1
2020-07-09	2	921	2020	7	9	2	31.35	79.375	4.91489	23.9167	Thursday	0	0.741667	36.9167	13.875	2
2020-07-10	7	922	2020	7	10	2	30.7833	72.7083	4.41304	24.1625	Friday	0	0.7	27.8261	11.5	1
2020-07-10	7	922	2020	7	10	2	30.7833	72.7083	4.41304	24.1625	Friday	0	0.7	27.8261	11.5	2
2020-07-11	5	923	2020	7	11	2	31.0958	72.4167	4.70833	23.8833	Saturday	0	0.7	33.1364	10.3333	1
2020-07-11	5	923	2020	7	11	2	31.0958	72.4167	4.70833	23.8833	Saturday	0	0.7	33.1364	10.3333	2
2020-07-12	4	924	2020	7	12	2	31.55	88.375	3.91489	23.4917	Sunday	0	0.7	36.2174	8.29167	1
2020-07-12	4	924	2020	7	12	2	31.55	88.375	3.91489	23.4917	Sunday	0	0.7	36.2174	8.29167	2
2020-07-13	5	925	2020	7	13	2	32.075	76.5208	1.8125	23.2083	Monday	0	0.75	58.8333	10.4583	1
2020-07-13	5	925	2020	7	13	2	32.075	76.5208	1.8125	23.2083	Monday	0	0.75	58.8333	10.4583	2
2020-07-14	6	926	2020	7	14	2	33.2625	77.3542	2.34783	23.2292	Tuesday	0	0.89375	129.062	20.875	1
2020-07-14	6	926	2020	7	14	2	33.2625	77.3542	2.34783	23.2292	Tuesday	0	0.89375	129.062	20.875	2
2020-07-15	4	927	2020	7	15	2	32.3792	79.0208	3.51064	22.5292	Wednesday	0	0.695652	57.087	13.5714	1
2020-07-15	4	927	2020	7	15	2	32.3792	79.0208	3.51064	22.5292	Wednesday	0	0.695652	57.087	13.5714	2
2020-07-16	4	928	2020	7	16	2	32.1708	68.7447	3.97917	22.7292	Thursday	0	0.504167	42.2917	7.375	1
2020-07-16	4	928	2020	7	16	2	32.1708	68.7447	3.97917	22.7292	Thursday	0	0.504167	42.2917	7.375	2
2020-07-17	3	929	2020	7	17	2	31.8792	66.4375	5.08333	23.05	Friday	0	0.55	33.3333	7.375	1
2020-07-17	3	929	2020	7	17	2	31.8792	66.4375	5.08333	23.05	Friday	0	0.55	33.3333	7.375	2
2020-07-18	2	930	2020	7	18	2	31.6958	67.4583	4.6875	23.075	Saturday	0	0.554167	33.7917	10	1
2020-07-18	2	930	2020	7	18	2	31.6958	67.4583	4.6875	23.075	Saturday	0	0.554167	33.7917	10	2
2020-07-19	2	931	2020	7	19	2	31.5417	86.875	4.2766	23.2333	Sunday	0	0.525	38.5	8.95833	1
2020-07-19	2	931	2020	7	19	2	31.5417	86.875	4.2766	23.2333	Sunday	0	0.525	38.5	8.95833	2
2020-07-20	3	932	2020	7	20	2	31.2958	76.0625	3.61702	23.2292	Monday	0	0.525	38.2083	8.625	1
2020-07-20	3	932	2020	7	20	2	31.2958	76.0625	3.61702	23.2292	Monday	0	0.525	38.2083	8.625	2
2020-07-21	1	933	2020	7	21	2	30.8458	75.2553	2.86957	22.0208	Tuesday	0	0.5125	39.9167	9.45833	1
2020-07-21	1	933	2020	7	21	2	30.8458	75.2553	2.86957	22.0208	Tuesday	0	0.5125	39.9167	9.45833	2
2020-07-22	1	934	2020	7	22	2	30.8333	62.6596	2.2766	23.6917	Wednesday	0	0.53913	37.9565	9.95833	1
2020-07-22	1	934	2020	7	22	2	30.8333	62.6596	2.2766	23.6917	Wednesday	0	0.53913	37.9565	9.95833	2
2020-07-23	5	935	2020	7	23	2	31.7542	78.1702	2.53191	23.3458	Thursday	0	0.5375	54.6667	10	1
2020-07-23	5	935	2020	7	23	2	31.7542	78.1702	2.53191	23.3458	Thursday	0	0.5375	54.6667	10	2
2020-07-24	6	936	2020	7	24	2	32.8375	70.25	2.02083	23.25	Friday	0	0.5625	68.0417	12.1667	1
2020-07-24	6	936	2020	7	24	2	32.8375	70.25	2.02083	23.25	Friday	0	0.5625	68.0417	12.1667	2
2020-07-25	3	937	2020	7	25	2	33.0083	75.1042	2.85106	23.6083	Saturday	0	0.6125	73.75	14.6667	1
2020-07-25	3	937	2020	7	25	2	33.0083	75.1042	2.85106	23.6083	Saturday	0	0.6125	73.75	14.6667	2
2020-07-26	6	938	2020	7	26	2	32.2458	78.8333	2.95833	23.6042	Sunday	0	0.545833	52.625	12.8333	1
2020-07-26	6	938	2020	7	26	2	32.2458	78.8333	2.95833	23.6042	Sunday	0	0.545833	52.625	12.8333	2
2020-07-27	8	939	2020	7	27	2	32.1565	74.25	3.82609	23.0913	Monday	0	0.508333	38.4583	9.20833	1
2020-07-27	8	939	2020	7	27	2	32.1565	74.25	3.82609	23.0913	Monday	0	0.508333	38.4583	9.20833	2
2020-07-28	8	940	2020	7	28	2	32.2167	70.1915	3.15217	23.3	Tuesday	0	0.570833	45.4167	10.6667	1
2020-07-28	8	940	2020	7	28	2	32.2167	70.1915	3.15217	23.3	Tuesday	0	0.570833	45.4167	10.6667	2
2020-07-29	5	941	2020	7	29	2	30.9958	59.7826	2.53191	22.9542	Wednesday	0	0.578261	48.6957	11.75	1
2020-07-29	5	941	2020	7	29	2	30.9958	59.7826	2.53191	22.9542	Wednesday	0	0.578261	48.6957	11.75	2
2020-07-30	4	942	2020	7	30	2	30.9	85.1702	2.97917	22.5783	Thursday	0	0.65	51.0455	12.9167	1
2020-07-30	4	942	2020	7	30	2	30.9	85.1702	2.97917	22.5783	Thursday	0	0.65	51.0455	12.9167	2
2020-07-31	6	943	2020	7	31	2	28.6292	83.1702	4.20833	22.7875	Friday	0	0.625	31.1667	10.875	1
2020-07-31	6	943	2020	7	31	2	28.6292	83.1702	4.20833	22.7875	Friday	0	0.625	31.1667	10.875	2
2020-08-01	3	944	2020	8	1	2	27.525	65.7083	4.82979	23.2542	Saturday	0	0.583333	28.7917	6.58333	1
2020-08-01	3	944	2020	8	1	2	27.525	65.7083	4.82979	23.2542	Saturday	0	0.583333	28.7917	6.58333	2
2020-08-02	3	945	2020	8	2	2	27.95	70.4583	3.83333	23.7167	Sunday	0	0.679167	40.4167	7.33333	1
2020-08-02	3	945	2020	8	2	2	27.95	70.4583	3.83333	23.7167	Sunday	0	0.679167	40.4167	7.33333	2
2020-08-03	5	946	2020	8	3	2	27.5583	79.25	2.95833	24.1583	Monday	0	0.666667	37.5833	8.16667	1
2020-08-03	5	946	2020	8	3	2	27.5583	79.25	2.95833	24.1583	Monday	0	0.666667	37.5833	8.16667	2
2020-08-04	3	947	2020	8	4	2	27.9167	69.5	2.5625	24.1125	Tuesday	0	0.704167	40.1667	10.2917	1
2020-08-04	3	947	2020	8	4	2	27.9167	69.5	2.5625	24.1125	Tuesday	0	0.704167	40.1667	10.2917	2
2020-08-05	6	948	2020	8	5	2	25.8542	64.0208	2.72917	23.9125	Wednesday	0	0.708696	9.21739	10.1667	1
2020-08-05	6	948	2020	8	5	2	25.8542	64.0208	2.72917	23.9125	Wednesday	0	0.708696	9.21739	10.1667	2
2020-08-06	6	949	2020	8	6	2	29.2458	79.6047	2.375	24.1375	Thursday	0	0.720833	50.2083	12.9583	1
2020-08-06	6	949	2020	8	6	2	29.2458	79.6047	2.375	24.1375	Thursday	0	0.720833	50.2083	12.9583	2
2020-08-07	5	950	2020	8	7	2	30.2042	71.6458	2.25	23.7	Friday	0	0.682609	43.3478	12.7826	1
2020-08-07	5	950	2020	8	7	2	30.2042	71.6458	2.25	23.7	Friday	0	0.682609	43.3478	12.7826	2
2020-08-08	2	951	2020	8	8	2	31.1917	65.2917	2.04167	23.0208	Saturday	0	0.655	41.75	11.15	1
2020-08-08	2	951	2020	8	8	2	31.1917	65.2917	2.04167	23.0208	Saturday	0	0.655	41.75	11.15	2
2020-08-09	7	952	2020	8	9	2	31.5583	75.0208	2.51064	23.1958	Sunday	0	0.666667	70.3333	13.2083	1
2020-08-09	7	952	2020	8	9	2	31.5583	75.0208	2.51064	23.1958	Sunday	0	0.666667	70.3333	13.2083	2
2020-08-10	3	953	2020	8	10	2	31.5667	66.8958	2.72917	23.525	Monday	0	0.6625	67.25	11.4167	1
2020-08-10	3	953	2020	8	10	2	31.5667	66.8958	2.72917	23.525	Monday	0	0.6625	67.25	11.4167	2
2020-08-11	4	954	2020	8	11	2	30.0458	71.8222	3.4375	24.1542	Tuesday	0	0.670833	34.25	9.08333	1
2020-08-11	4	954	2020	8	11	2	30.0458	71.8222	3.4375	24.1542	Tuesday	0	0.670833	34.25	9.08333	2
2020-08-12	7	955	2020	8	12	2	27.1409	77.7083	3.13043	24.0909	Wednesday	0	0.7375	31.4167	11.2083	1
2020-08-12	7	955	2020	8	12	2	27.1409	77.7083	3.13043	24.0909	Wednesday	0	0.7375	31.4167	11.2083	2
2020-08-13	5	956	2020	8	13	2	27.7958	71.3696	2.70833	24.1542	Thursday	0	0.647826	22.8696	8.66667	1
2020-08-13	5	956	2020	8	13	2	27.7958	71.3696	2.70833	24.1542	Thursday	0	0.647826	22.8696	8.66667	2
2020-08-14	4	957	2020	8	14	2	28.4083	65.6667	2.125	24.1208	Friday	0	0.525	28.125	13	1
2020-08-14	4	957	2020	8	14	2	28.4083	65.6667	2.125	24.1208	Friday	0	0.525	28.125	13	2
2020-08-15	3	958	2020	8	15	2	27.975	64.375	1.73333	23.7875	Saturday	0	0.479167	35.0833	10.5417	1
2020-08-15	3	958	2020	8	15	2	27.975	64.375	1.73333	23.7875	Saturday	0	0.479167	35.0833	10.5417	2
2020-08-16	4	959	2020	8	16	2	28.9833	74.25	2.67391	22.7583	Sunday	0	0.525	69.8	15.3125	1
2020-08-16	4	959	2020	8	16	2	28.9833	74.25	2.67391	22.7583	Sunday	0	0.525	69.8	15.3125	2
2020-08-17	6	960	2020	8	17	2	27.7833	34.7292	2.21429	23.3167	Monday	0	0.666667	36.2083	20.0833	1
2020-08-17	6	960	2020	8	17	2	27.7833	34.7292	2.21429	23.3167	Monday	0	0.666667	36.2083	20.0833	2
2020-08-18	3	961	2020	8	18	2	27.925	70.375	2.29787	23.0583	Tuesday	0	0.616667	42.4583	18.125	1
2020-08-18	3	961	2020	8	18	2	27.925	70.375	2.29787	23.0583	Tuesday	0	0.616667	42.4583	18.125	2
2020-08-19	8	962	2020	8	19	2	26.3167	86.9149	4.34043	23.6625	Wednesday	0	0.504348	23.6087	6.375	1
2020-08-19	8	962	2020	8	19	2	26.3167	86.9149	4.34043	23.6625	Wednesday	0	0.504348	23.6087	6.375	2
2020-08-20	3	963	2020	8	20	2	28.425	70.8913	1.9375	24.2167	Thursday	0	0.641667	46.7917	15.5417	1
2020-08-20	3	963	2020	8	20	2	28.425	70.8913	1.9375	24.2167	Thursday	0	0.641667	46.7917	15.5417	2
2020-08-21	5	964	2020	8	21	2	30.4958	61.9167	1.55319	23.6	Friday	0	0.65	78.25	27.625	1
2020-08-21	5	964	2020	8	21	2	30.4958	61.9167	1.55319	23.6	Friday	0	0.65	78.25	27.625	2
2020-08-22	2	965	2020	8	22	2	29.4917	68.8333	1.6875	23.8083	Saturday	0	0.6875	101.042	32.4167	1
2020-08-22	2	965	2020	8	22	2	29.4917	68.8333	1.6875	23.8083	Saturday	0	0.6875	101.042	32.4167	2
2020-08-23	11	966	2020	8	23	2	30.7	66.25	1.39583	24.0417	Sunday	0	0.6375	80.7083	27.3333	1
2020-08-23	11	966	2020	8	23	2	30.7	66.25	1.39583	24.0417	Sunday	0	0.6375	80.7083	27.3333	2
2020-08-24	6	967	2020	8	24	2	31.4542	42.7083	2.125	23.8625	Monday	0	0.616667	86.5417	24.875	1
2020-08-24	6	967	2020	8	24	2	31.4542	42.7083	2.125	23.8625	Monday	0	0.616667	86.5417	24.875	2
2020-08-25	5	968	2020	8	25	2	31.7333	64.1875	2.91667	24.0542	Tuesday	0	0.629167	81.25	17.4583	1
2020-08-25	5	968	2020	8	25	2	31.7333	64.1875	2.91667	24.0542	Tuesday	0	0.629167	81.25	17.4583	2
2020-08-26	1	969	2020	8	26	2	28.15	84.4167	2.6875	23.8667	Wednesday	0	0.6	64.6522	13.875	1
2020-08-26	1	969	2020	8	26	2	28.15	84.4167	2.6875	23.8667	Wednesday	0	0.6	64.6522	13.875	2
2020-08-27	6	970	2020	8	27	2	29.2917	81.0213	1.69565	23.5708	Thursday	0	0.620833	90.625	18.9583	1
2020-08-27	6	970	2020	8	27	2	29.2917	81.0213	1.69565	23.5708	Thursday	0	0.620833	90.625	18.9583	2
2020-08-28	6	971	2020	8	28	2	30.8833	65.9167	1.97826	22.7625	Friday	0	0.791667	102.458	33.1667	1
2020-08-28	6	971	2020	8	28	2	30.8833	65.9167	1.97826	22.7625	Friday	0	0.791667	102.458	33.1667	2
2020-08-29	3	972	2020	8	29	2	30.7208	45.5833	1.78723	23.4833	Saturday	0	0.858333	116.5	43.75	1
2020-08-29	3	972	2020	8	29	2	30.7208	45.5833	1.78723	23.4833	Saturday	0	0.858333	116.5	43.75	2
2020-08-30	11	973	2020	8	30	2	31.1708	62.8958	2.14583	22.9792	Sunday	0	0.8	106.958	39.2083	1
2020-08-30	11	973	2020	8	30	2	31.1708	62.8958	2.14583	22.9792	Sunday	0	0.8	106.958	39.2083	2
2020-08-31	8	974	2020	8	31	2	29.7792	44.7083	2.35417	24.0417	Monday	0	0.720833	88.1667	24.4167	1
2020-08-31	8	974	2020	8	31	2	29.7792	44.7083	2.35417	24.0417	Monday	0	0.720833	88.1667	24.4167	2
2020-09-01	4	975	2020	9	1	3	29.875	62.7708	1.67391	23.7583	Tuesday	0	0.816667	77.9167	31.2083	1
2020-09-01	4	975	2020	9	1	3	29.875	62.7708	1.67391	23.7583	Tuesday	0	0.816667	77.9167	31.2083	2
2020-09-02	11	976	2020	9	2	3	30.9625	87.0222	1.75	23.1	Wednesday	0	0.9	87.4167	41.5417	1
2020-09-02	11	976	2020	9	2	3	30.9625	87.0222	1.75	23.1	Wednesday	0	0.9	87.4167	41.5417	2
2020-09-03	9	977	2020	9	3	3	31.3083	80.5208	1.41667	23.275	Thursday	0	1.0087	99.0909	54.4583	1
2020-09-03	9	977	2020	9	3	3	31.3083	80.5208	1.41667	23.275	Thursday	0	1.0087	99.0909	54.4583	2
2020-09-04	12	978	2020	9	4	3	27.5125	69.1667	2.64583	24.3458	Friday	0	0.95	82.913	44.7083	1
2020-09-04	12	978	2020	9	4	3	27.5125	69.1667	2.64583	24.3458	Friday	0	0.95	82.913	44.7083	2
2020-09-05	3	979	2020	9	5	3	26.9167	51.6875	1.91667	23.7542	Saturday	0	0.904167	59.0417	28.625	1
2020-09-05	3	979	2020	9	5	3	26.9167	51.6875	1.91667	23.7542	Saturday	0	0.904167	59.0417	28.625	2
2020-09-06	5	980	2020	9	6	3	30.0958	62.375	1.93617	23.8792	Sunday	0	0.858333	96.5833	31.2917	1
2020-09-06	5	980	2020	9	6	3	30.0958	62.375	1.93617	23.8792	Sunday	0	0.858333	96.5833	31.2917	2
2020-09-07	7	981	2020	9	7	3	27.6083	43.1042	2.23404	24.4	Monday	0	0.7125	53.25	15.4583	1
2020-09-07	7	981	2020	9	7	3	27.6083	43.1042	2.23404	24.4	Monday	0	0.7125	53.25	15.4583	2
2020-09-08	10	982	2020	9	8	3	26.5	60.6304	2.04255	24.3	Tuesday	0	0.7875	16.8333	15.4167	1
2020-09-08	10	982	2020	9	8	3	26.5	60.6304	2.04255	24.3	Tuesday	0	0.7875	16.8333	15.4167	2
2020-09-09	16	983	2020	9	9	3	26.8042	87.6458	1.69767	23.8375	Wednesday	0	0.8375	34.2609	18	1
2020-09-09	16	983	2020	9	9	3	26.8042	87.6458	1.69767	23.8375	Wednesday	0	0.8375	34.2609	18	2
2020-09-10	3	984	2020	9	10	3	28.625	79.0426	2.13043	23.6833	Thursday	0	0.816667	50.6667	21.4167	1
2020-09-10	3	984	2020	9	10	3	28.625	79.0426	2.13043	23.6833	Thursday	0	0.816667	50.6667	21.4167	2
2020-09-11	3	985	2020	9	11	3	28.2375	68.9375	2.58696	23.7083	Friday	0	0.908333	27.8333	20.4167	1
2020-09-11	3	985	2020	9	11	3	28.2375	68.9375	2.58696	23.7083	Friday	0	0.908333	27.8333	20.4167	2
2020-09-12	12	986	2020	9	12	3	27.0833	63.8542	2.2766	23.7125	Saturday	0	0.720833	64.625	13.2083	1
2020-09-12	12	986	2020	9	12	3	27.0833	63.8542	2.2766	23.7125	Saturday	0	0.720833	64.625	13.2083	2
2020-09-13	7	987	2020	9	13	3	27.0542	76.7292	1.72917	23.8792	Sunday	0	0.795652	56.4545	20.913	1
2020-09-13	7	987	2020	9	13	3	27.0542	76.7292	1.72917	23.8792	Sunday	0	0.795652	56.4545	20.913	2
2020-09-14	16	988	2020	9	14	3	27.1958	46.6458	1.93617	23.9208	Monday	0	0.883333	53.913	19.8333	1
2020-09-14	16	988	2020	9	14	3	27.1958	46.6458	1.93617	23.9208	Monday	0	0.883333	53.913	19.8333	2
2020-09-15	10	989	2020	9	15	3	25.7708	58.8333	2.14894	23.8333	Tuesday	0	0.920833	19.0833	16.25	1
2020-09-15	10	989	2020	9	15	3	25.7708	58.8333	2.14894	23.8333	Tuesday	0	0.920833	19.0833	16.25	2
2020-09-16	12	990	2020	9	16	3	27.3333	69.0417	2.02222	24.4542	Wednesday	0	0.856522	39.4167	12.875	1
2020-09-16	12	990	2020	9	16	3	27.3333	69.0417	2.02222	24.4542	Wednesday	0	0.856522	39.4167	12.875	2
2020-09-17	11	991	2020	9	17	3	29.3375	85.3617	2.25	24.3208	Thursday	0	0.8125	31.5833	13.375	1
2020-09-17	11	991	2020	9	17	3	29.3375	85.3617	2.25	24.3208	Thursday	0	0.8125	31.5833	13.375	2
2020-09-18	9	992	2020	9	18	3	26.3917	81.3125	3.08696	23.475	Friday	0	0.740909	22.5	8.79167	1
2020-09-18	9	992	2020	9	18	3	26.3917	81.3125	3.08696	23.475	Friday	0	0.740909	22.5	8.79167	2
2020-09-19	15	993	2020	9	19	3	26.3167	77.3333	3.14894	24.0167	Saturday	0	0.758333	24.875	9.91667	1
2020-09-19	15	993	2020	9	19	3	26.3167	77.3333	3.14894	24.0167	Saturday	0	0.758333	24.875	9.91667	2
2020-09-20	9	994	2020	9	20	3	28.4708	76.4783	1.60417	24.3042	Sunday	0	0.7625	41.9167	10.4583	1
2020-09-20	9	994	2020	9	20	3	28.4708	76.4783	1.60417	24.3042	Sunday	0	0.7625	41.9167	10.4583	2
2020-09-21	10	995	2020	9	21	3	27.7792	50.2083	2.22222	24.3792	Monday	0	0.782609	46.6957	15.4545	1
2020-09-21	10	995	2020	9	21	3	27.7792	50.2083	2.22222	24.3792	Monday	0	0.782609	46.6957	15.4545	2
2020-09-22	8	996	2020	9	22	3	28.4708	58.4889	1.63043	24.4667	Tuesday	0	0.775	65.5417	14.7917	1
2020-09-22	8	996	2020	9	22	3	28.4708	58.4889	1.63043	24.4667	Tuesday	0	0.775	65.5417	14.7917	2
2020-09-23	14	997	2020	9	23	3	26.775	46.4792	2.04167	22.6167	Wednesday	0	0.817391	62.9583	17.4167	1
2020-09-23	14	997	2020	9	23	3	26.775	46.4792	2.04167	22.6167	Wednesday	0	0.817391	62.9583	17.4167	2
2020-09-24	15	998	2020	9	24	3	25.4167	80.8222	3.1875	19.9708	Thursday	0	0.9375	43.5833	12.9583	1
2020-09-24	15	998	2020	9	24	3	25.4167	80.8222	3.1875	19.9708	Thursday	0	0.9375	43.5833	12.9583	2
2020-09-25	8	999	2020	9	25	3	26.575	94.625	1.85417	21.3167	Friday	0	0.970833	46.7083	18.625	1
2020-09-25	8	999	2020	9	25	3	26.575	94.625	1.85417	21.3167	Friday	0	0.970833	46.7083	18.625	2
2020-09-26	15	1000	2020	9	26	3	25	73.1875	2.375	21.9583	Saturday	0	1.04167	67.4167	29.5833	1
[truncated: 923 more rows]

## Sheet: code
variable	Code
RD	the number of children with RDs on day
time	control the long-term trend for the number of children newly diagnosed with RD each day
season	1, spring; 2, summer; 3, autum; 4, winter
sex	1, male; 2, female
