# Supplementary material for: Seasonally modulated nonlinear effects of PM2.5 on pediatric respiratory health: evidence from a time-series analysis in urban China
Source: PeerJ. 2025 Oct 10;13:e20187. doi: 10.7717/peerj.20187 (PMC12517280; doi:10.7717/peerj.20187)
Supplement: Supplemental Information 2 [file peerj-13-20187-s002.xlsx]

## Sheet: code
Variable	Code
Respiratory diseases	the number of children with RDs on day
time	control the long-term trend for the number of children newly diagnosed with RD each day
season	1, spring; 2, summer; 3, autum; 4, winter
sex	1, male; 2, female
Holiday	0, workday; 1, statutory holiday.
